# Supplementary material for: Multiple ethylene activation by heteroleptic L(Cl)Ga-substituted germylenes
Source: Royal Society of Chemistry journal article supplement (doi:10.1039/d3dt03944g), 2023-12-05
Supplement: d3dt03944g1.pdf [file d3dt03944g1.pdf]

## Supporting Information

### Multiple Ethylene Activation by Heteroleptic L(Cl)Ga-substituted Germylenes

*Anna Bücken,<sup>a</sup> Christoph Wölper,<sup>a</sup> Hannah Siera,<sup>b</sup> Gebhard Haberhauer,<sup>b</sup> and Stephan Schulz<sup>\*a,c</sup>*

<sup>a</sup> Institute of Inorganic Chemistry, University of Duisburg-Essen, 45117 Essen, Germany. E-mail: [stephan.schulz@uni-due.de](mailto:stephan.schulz@uni-due.de).

<sup>b</sup> Institute of Organic Chemistry, University of Duisburg-Essen, 45117 Essen, Germany.

<sup>c</sup> Center for Nanointegration Duisburg-Essen (CENIDE), University of Duisburg-Essen, 47057 Duisburg, Germany.

**E-mail Corresponding author:** [stephan.schulz@uni-due.de](mailto:stephan.schulz@uni-due.de).

## Content

### I. Spectroscopic Characterization

**Figure S1–S2.**  $^1\text{H}$  NMR and IR spectra of **3**.

**Figure S3–S5.**  $^1\text{H}$ ,  $^{13}\text{C}$  NMR and IR spectra of **4**.

**Figure S6–S8.**  $^1\text{H}$ ,  $^{13}\text{C}$  NMR and IR spectra of **5**.

**Figure S9:** Time-dependent  $^1\text{H}$  NMR spectra of **3** in toluene- $d_8$  and 1,2-difluorobenzene at 90 °C.

### II. Crystallographic Data

**Table S1.** Crystallographic details of compounds **3–5**.

### III. Computational Details

**Figure S10–S12.** Gibbs energies for the reaction of germylene **S1–S4** with ethylene calculated by means of PBE0-D3BJ.

**Figure S13.** Energy scan for the elimination of ethylene from 1,2-digermacyclobutanes **4**, **5** and **S5**.

### IV. Absolute Energies and Cartesian Coordinates for the Calculated Compounds

**Table S2.** Absolute energies [au] calculated by means of different methods.

## I. Spectroscopic Characterization

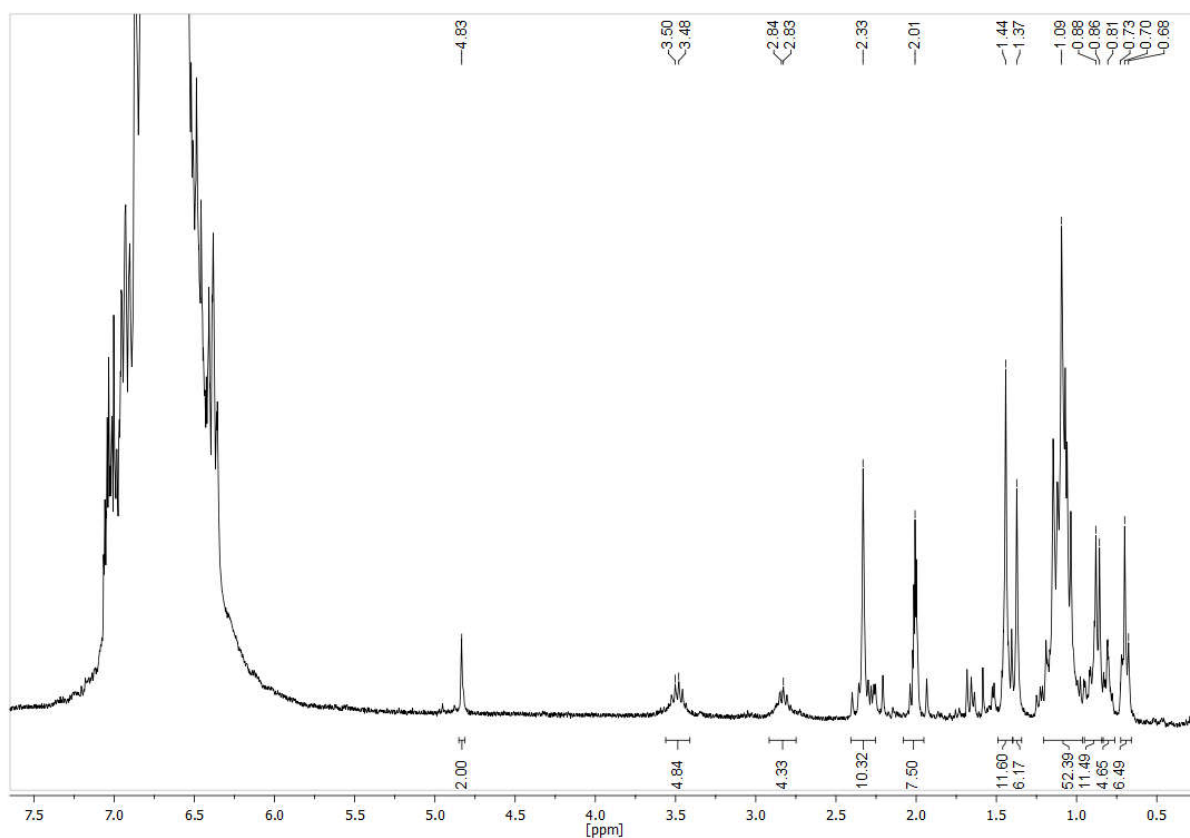

**Figure S1.** <sup>1</sup>H NMR spectrum of **3** in toluene-*d*<sub>8</sub> and 1,2-difluorobenzene at 90 °C. The low resolution is caused by the low solubility and thermal instability of compound **3**.

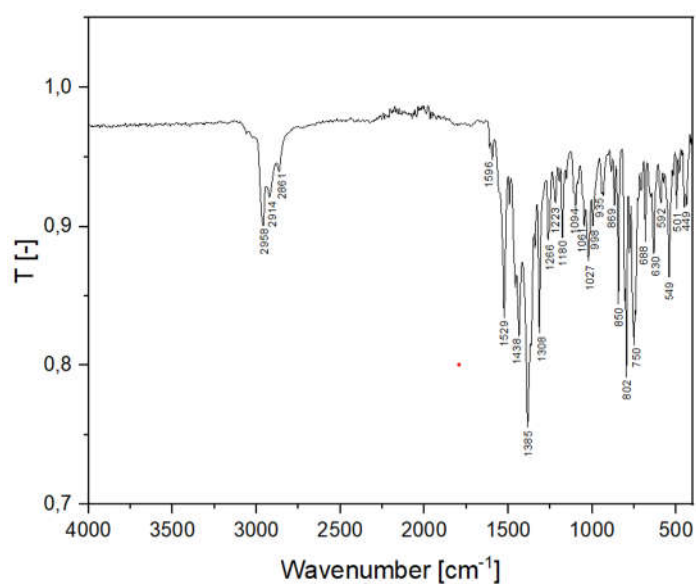

**Figure S2.** IR spectrum of **3**.

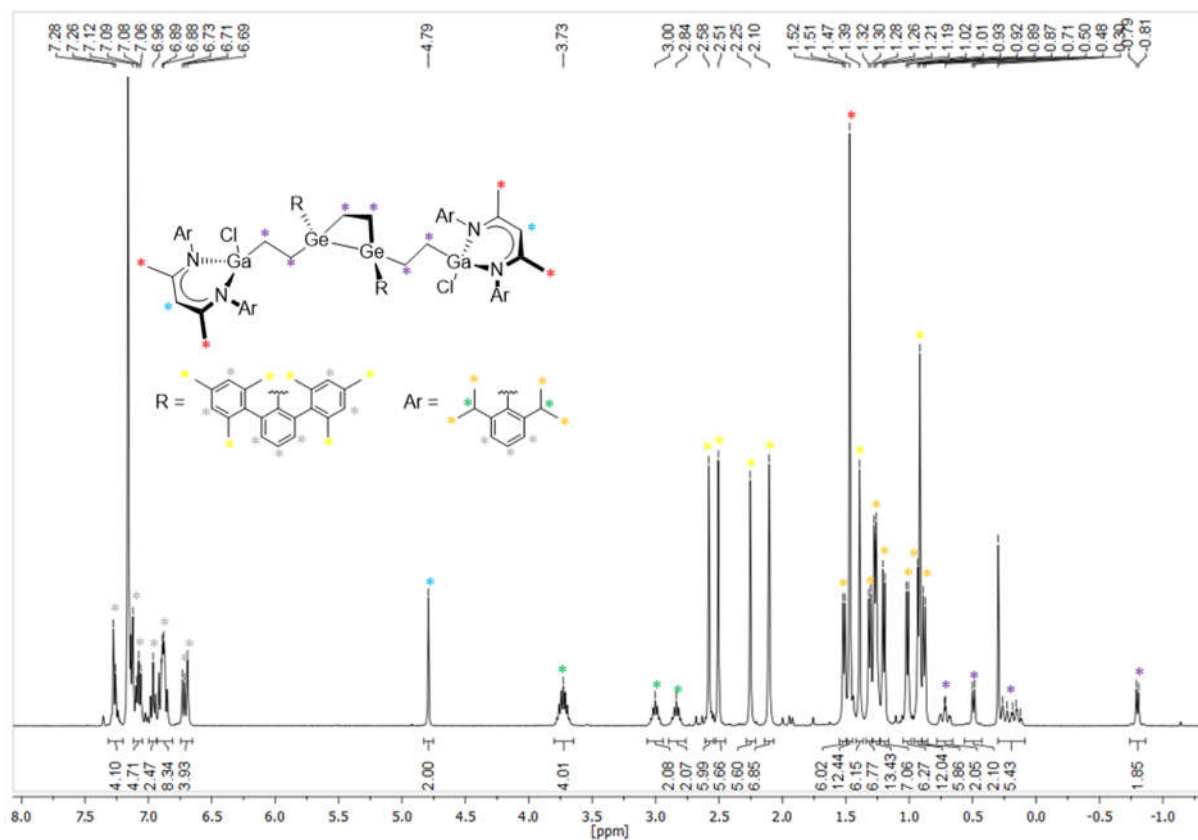

Figure S3. <sup>1</sup>H NMR spectrum of **4** in C<sub>6</sub>D<sub>6</sub> at r.t.

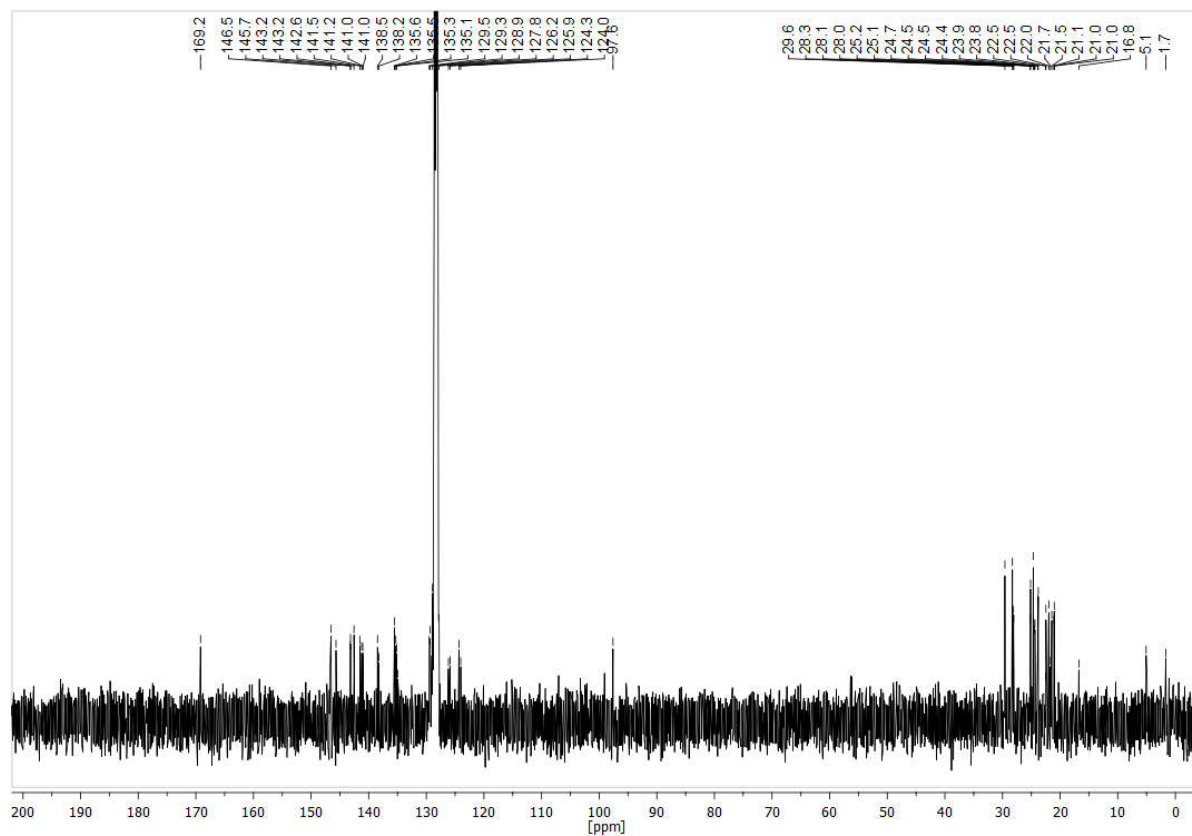

Figure S4. <sup>13</sup>C NMR spectrum of **4** in C<sub>6</sub>D<sub>6</sub> at r.t.

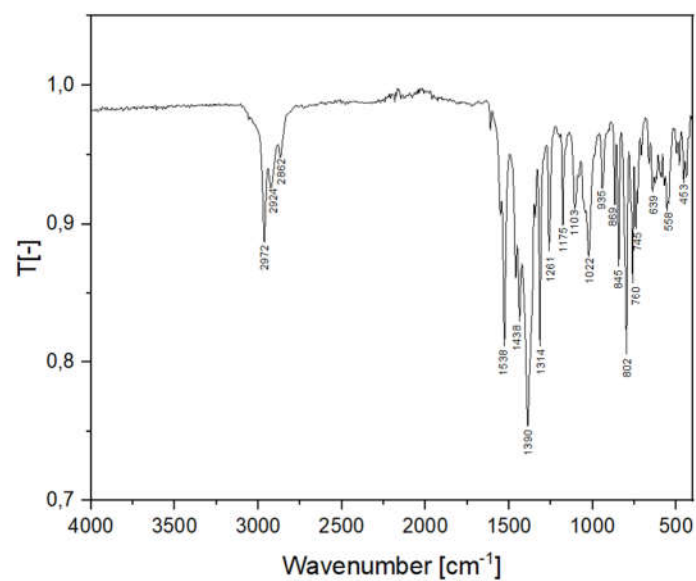

Figure S5. IR spectrum of 4.

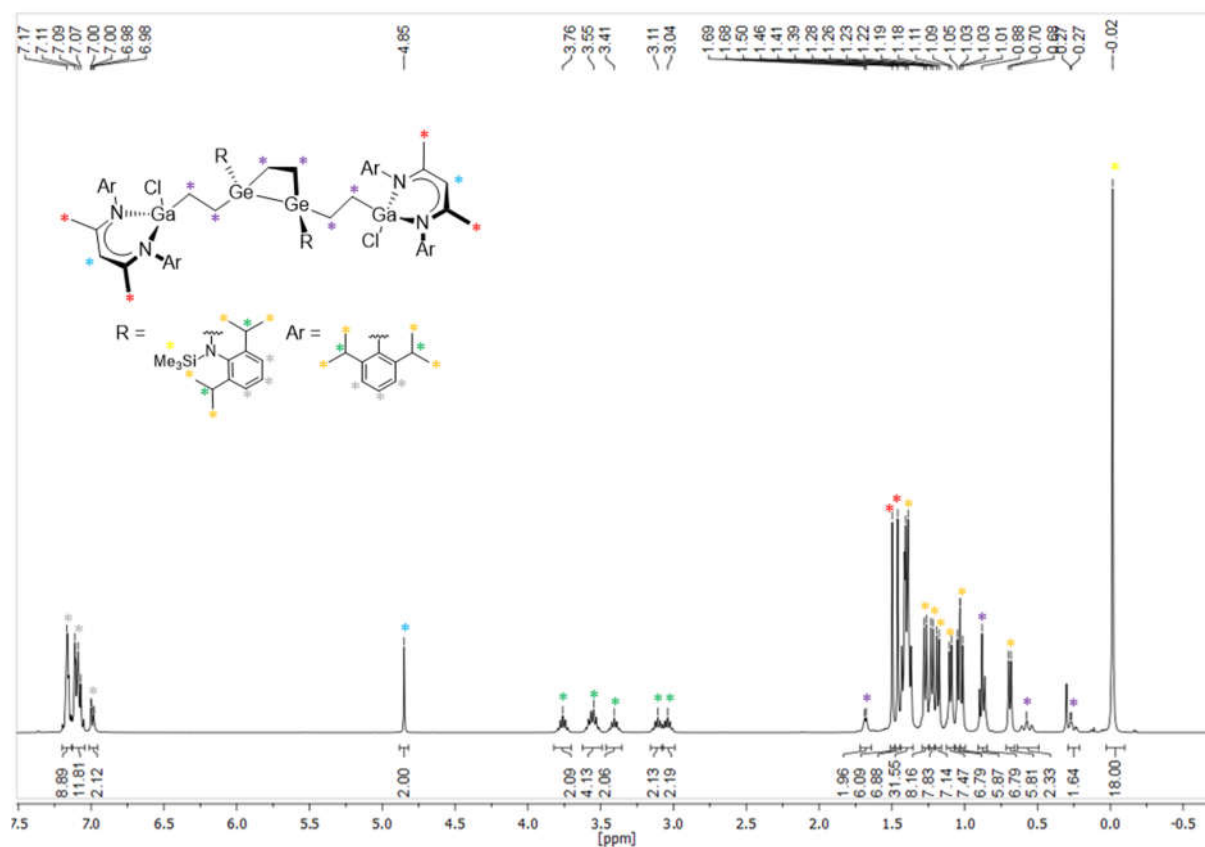

Figure S6.  $^1\text{H}$  NMR spectrum of 5 in  $\text{C}_6\text{D}_6$  at r.t.

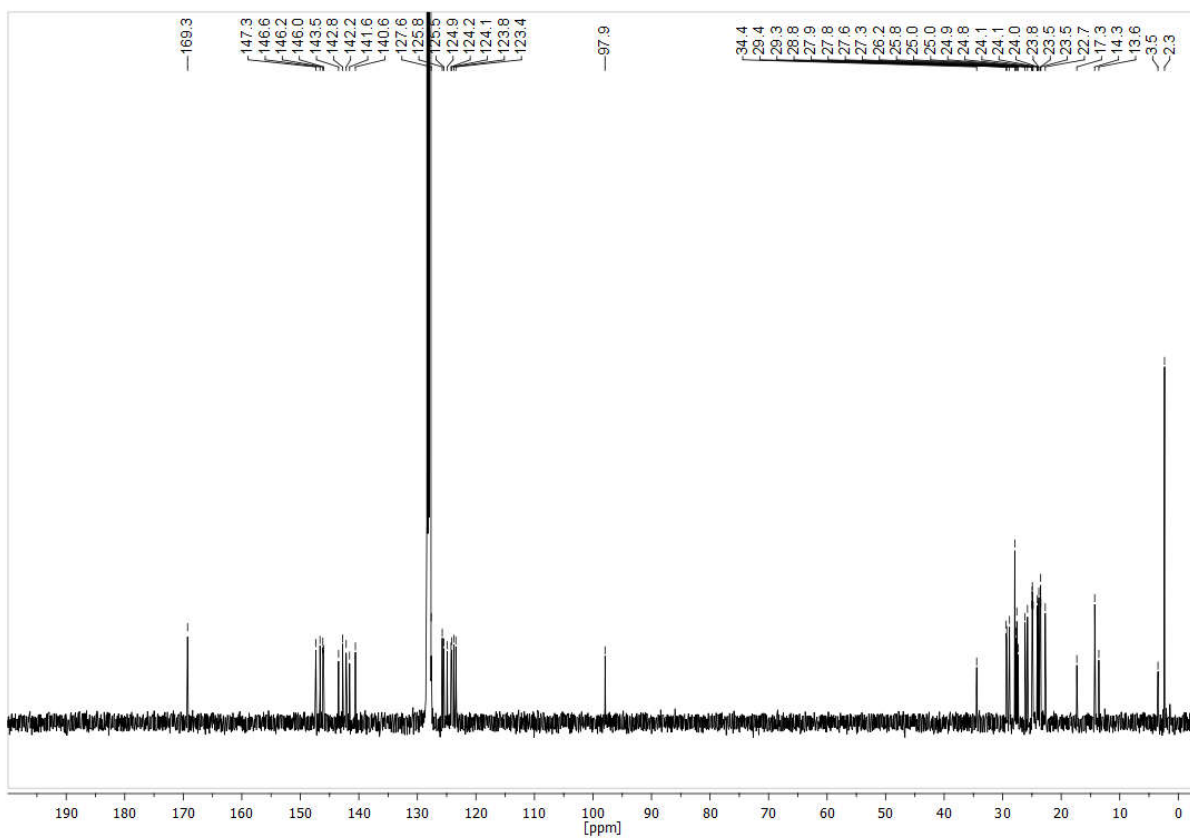

Figure S7.  $^{13}\text{C}$  NMR spectrum of **5** in  $\text{C}_6\text{D}_6$  at r.t.

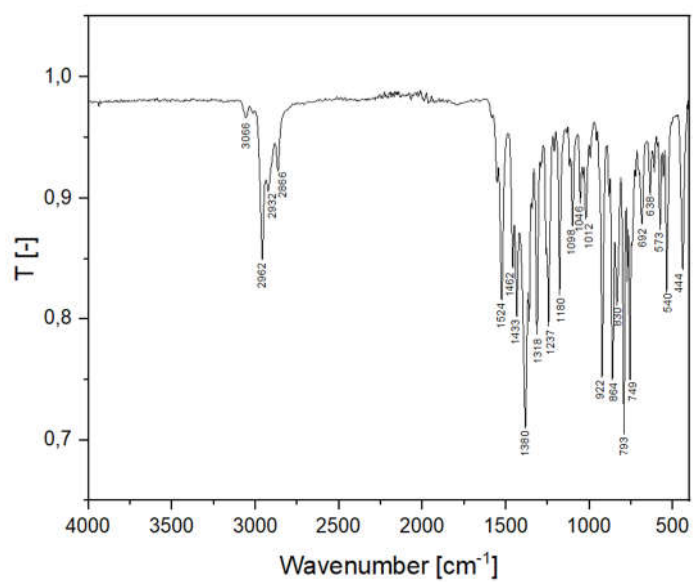

Figure S8. IR spectrum of **5**.

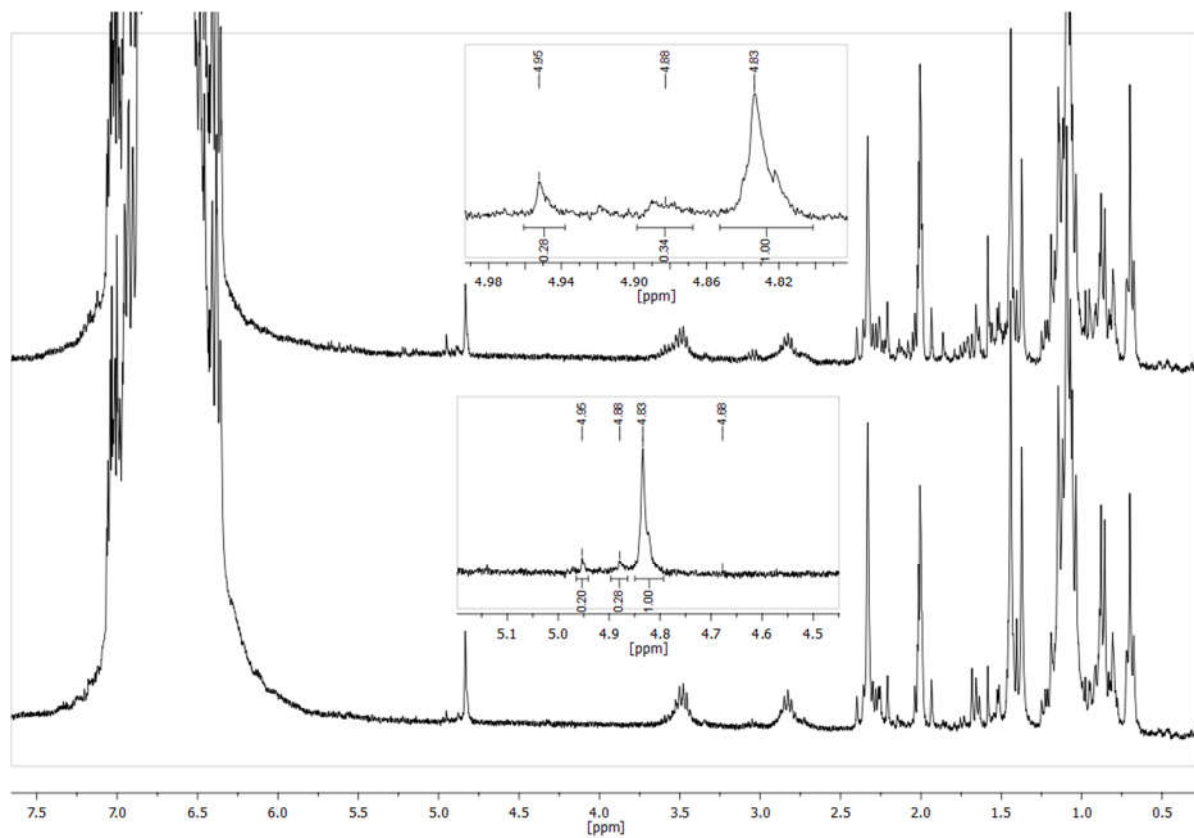

**Figure S9.** Time-dependent  $^1\text{H}$  NMR spectra of **3** in  $\text{toluene-}d_8$  and 1,2-difluorobenzene at  $90^\circ\text{C}$ .

## II. Crystallographic Data

**Table S1.** Crystallographic details of compounds **3–5**.

| Identification code                                       | <b>3</b>                                                                                                        | <b>4</b>                                                                                         | <b>5</b>                                                                                                         |
|-----------------------------------------------------------|-----------------------------------------------------------------------------------------------------------------|--------------------------------------------------------------------------------------------------|------------------------------------------------------------------------------------------------------------------|
| Empirical formula                                         | C <sub>134</sub> H <sub>160</sub> Cl <sub>2</sub> F <sub>4</sub> Ga <sub>2</sub> Ge <sub>2</sub> N <sub>4</sub> | C <sub>136</sub> H <sub>168</sub> Cl <sub>2</sub> Ga <sub>2</sub> Ge <sub>2</sub> N <sub>4</sub> | C <sub>104</sub> H <sub>170</sub> Cl <sub>2</sub> Ga <sub>2</sub> Ge <sub>2</sub> N <sub>6</sub> Si <sub>2</sub> |
| <i>M</i>                                                  | 2258.17                                                                                                         | 2214.25                                                                                          | 1916.15                                                                                                          |
| Crystal size [mm]                                         | 0.304×0.259×0.105                                                                                               | 0.243×0.177×0.040                                                                                | 0.252×0.157×0.138                                                                                                |
| <i>T</i> [K]                                              | 100(2)                                                                                                          | 100(2)                                                                                           | 100(2)                                                                                                           |
| Crystal system                                            | monoclinic                                                                                                      | triclinic                                                                                        | monoclinic                                                                                                       |
| Space group                                               | <i>C</i> 2/ <i>c</i>                                                                                            | <i>P</i> -1                                                                                      | <i>P</i> 2 <sub>1</sub> / <i>c</i>                                                                               |
| <i>a</i> [Å]                                              | 36.693(5)                                                                                                       | 14.0575(8)                                                                                       | 27.3921(14)                                                                                                      |
| <i>b</i> [Å]                                              | 15.536(2)                                                                                                       | 20.5970(12)                                                                                      | 14.6446(7)                                                                                                       |
| <i>c</i> [Å]                                              | 20.813(3)                                                                                                       | 23.6061(14)                                                                                      | 29.8421(15)                                                                                                      |
| <i>α</i> [°]                                              | 90                                                                                                              | 115.356(2)                                                                                       | 90                                                                                                               |
| <i>β</i> [°]                                              | 92.735(4)                                                                                                       | 97.878(2)                                                                                        | 113.082(2)                                                                                                       |
| <i>γ</i> [°]                                              | 90                                                                                                              | 94.810(2)                                                                                        | 90                                                                                                               |
| <i>V</i> [Å <sup>3</sup> ]                                | 11851(3)                                                                                                        | 6040.1(6)                                                                                        | 11012.7(10)                                                                                                      |
| <i>Z</i>                                                  | 4                                                                                                               | 2                                                                                                | 4                                                                                                                |
| <i>D</i> <sub>calc</sub> [g·cm <sup>-3</sup> ]            | 1.266                                                                                                           | 1.217                                                                                            | 1.156                                                                                                            |
| <i>μ</i> (MoK <sub>α</sub> [mm <sup>-1</sup> ])           | 1.054                                                                                                           | 1.863                                                                                            | 2.168                                                                                                            |
| Transmissions                                             | 0.75/0.60                                                                                                       | 0.75/0.58                                                                                        | 0.75/0.63                                                                                                        |
| <i>F</i> (000)                                            | 4752                                                                                                            | 2344                                                                                             | 4096                                                                                                             |
| Index ranges                                              | -52 ≤ <i>h</i> ≤ 52                                                                                             | -17 ≤ <i>h</i> ≤ 18                                                                              | -33 ≤ <i>h</i> ≤ 34                                                                                              |
|                                                           | -22 ≤ <i>k</i> ≤ 22                                                                                             | -26 ≤ <i>k</i> ≤ 26                                                                              | -18 ≤ <i>k</i> ≤ 18                                                                                              |
|                                                           | -29 ≤ <i>l</i> ≤ 29                                                                                             | -30 ≤ <i>l</i> ≤ 30                                                                              | -38 ≤ <i>l</i> ≤ 38                                                                                              |
| <i>θ</i> <sub>max</sub> [°]                               | 30.507                                                                                                          | 81.182                                                                                           | 80.083                                                                                                           |
| Reflections collected                                     | 188073                                                                                                          | 387670                                                                                           | 617598                                                                                                           |
| Independent reflections                                   | 18092                                                                                                           | 26310                                                                                            | 23964                                                                                                            |
| <i>R</i> <sub>int</sub>                                   | 0.0522                                                                                                          | 0.0579                                                                                           | 0.0865                                                                                                           |
| Refined parameters                                        | 747                                                                                                             | 1136                                                                                             | 1054                                                                                                             |
| <i>R</i> <sub>1</sub> [ <i>I</i> > 2σ( <i>I</i> )]        | 0.0445                                                                                                          | 0.0427                                                                                           | 0.0426                                                                                                           |
| <i>wR</i> <sub>2</sub> [all data]                         | 0.1147                                                                                                          | 0.1170                                                                                           | 0.1056                                                                                                           |
| GooF                                                      | 1.090                                                                                                           | 1.011                                                                                            | 1.106                                                                                                            |
| <i>Δρ</i> <sub>final</sub> (max/min) [e·Å <sup>-3</sup> ] | 2.901/-1.152                                                                                                    | 2.195/-1.093                                                                                     | 1.132/-0.547                                                                                                     |



### III. Computational Details

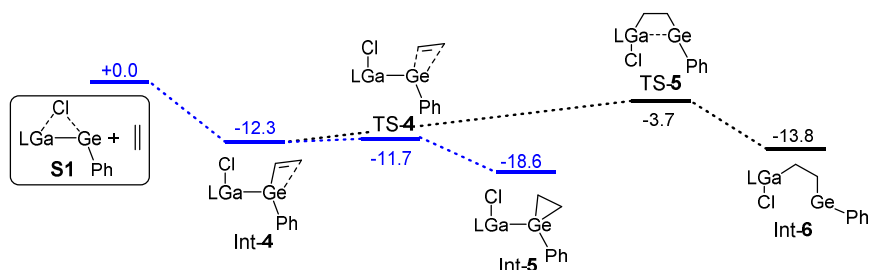

**Figure S10.** Gibbs energies for the reaction of germylene **S1** with ethylene calculated by means of PBE0-D3BJ(SMD,benzene as solvent)//def2-TZVP//PBE0-D3BJ/def2-SVP. The values are given in kcal/mol. L = HC(C(Me)NPh)<sub>2</sub>.

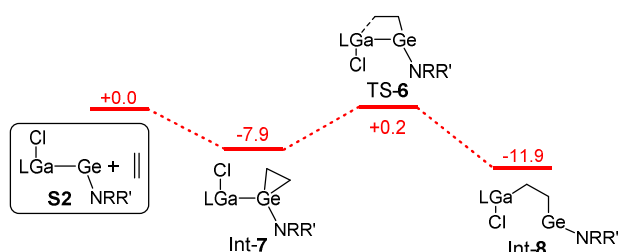

**Figure S11.** Gibbs energies for the reaction of germylene **S2** with ethylene calculated by means of PBE0-D3BJ(SMD,benzene as solvent)//def2-TZVP//PBE0-D3BJ/def2-SVP. The values are given in kcal/mol. L = HC(C(Me)NPh)<sub>2</sub>; NRR' = N(SiMe<sub>3</sub>)(Ph).

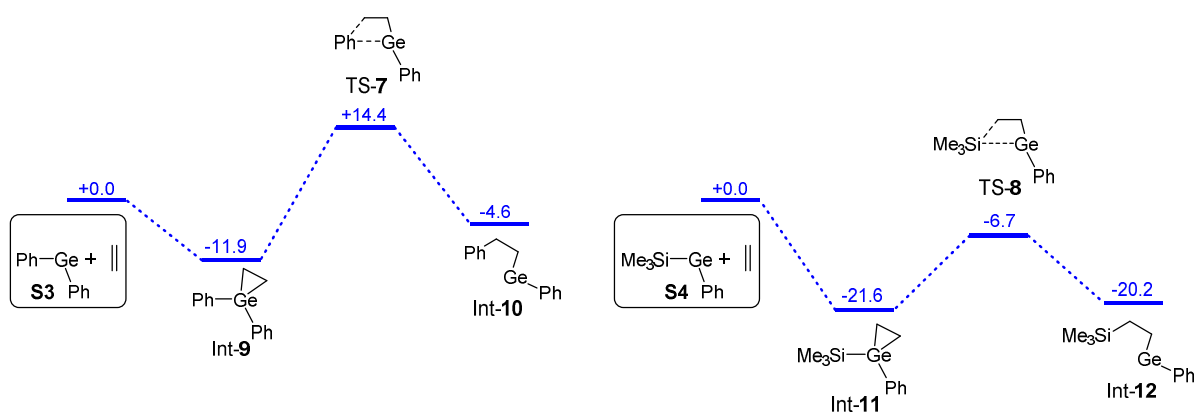

**Figure S12.** Gibbs energies for the reaction of germylene **S3** with ethylene calculated by means of PBE0-D3BJ(SMD,benzene as solvent)//def2-TZVP//PBE0-D3BJ/def2-SVP. The values are given in kcal/mol.

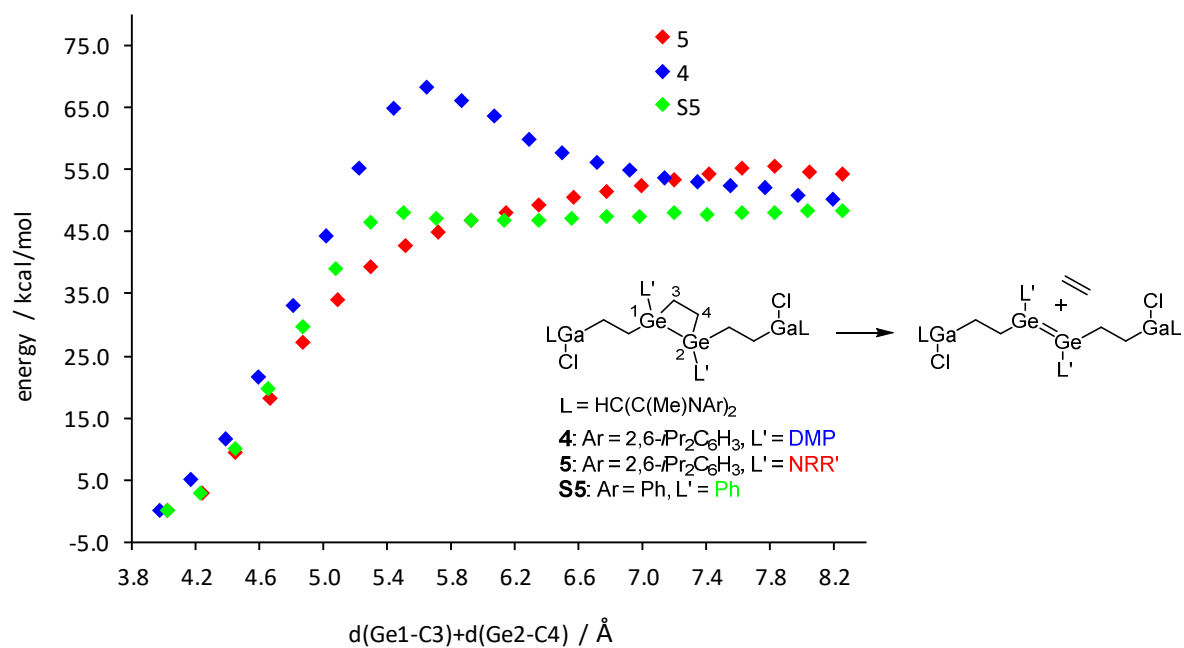

**Figure S13.** Energy scan for the elimination of ethylene from 1,2-digermacyclobutanes **4**, **5** and **S5** calculated by means of PBE0-D3BJ/def2-SVP. The sum of the two Ge–C distances ( $d(Ge1-C3)$  and  $d(Ge2-C4)$ ) was used as reaction coordinate. While a transition state is found for system **4**, the elimination of ethylene from **5** proceeds without a barrier. DMP = 2,6-Mes<sub>2</sub>C<sub>6</sub>H<sub>3</sub>, Mes = 2,4,6-Me<sub>3</sub>C<sub>6</sub>H<sub>2</sub>; NRR' = N(SiMe<sub>3</sub>)(Ar).

## IV. Absolute Energies and Cartesian Coordinates for the Calculated Compounds

**Table S2.** Absolute energies [au] calculated by means of different methods.

| Compound  | $E^a$         | $G^a$         | $E^b$         |
|-----------|---------------|---------------|---------------|
| ethylene  | -78.427381    | -78.398546    | -78.515329    |
| <b>1</b>  | -6625.889435  | -6624.929430  | -6628.824709  |
| TS-1a     | -6704.322406  | -6703.310303  | -6707.341665  |
| Int-1a    | -6704.367304  | -6703.352573  | -6707.384412  |
| TS-2a     | -6704.349038  | -6703.335377  | -6707.366449  |
| Int-2a    | -6704.367908  | -6703.357474  | -6707.388093  |
| <b>3</b>  | -13408.827801 | -13406.768222 | -13414.848352 |
| TS-3a     | -13487.212881 | -13485.107264 | -13493.324953 |
| <b>4</b>  | -13487.318209 | -13485.205498 | -13493.425276 |
| <b>2</b>  | -6628.149981  | -6627.226112  | -6630.896152  |
| TS-1b     | -6706.571656  | -6705.595263  | -6709.403964  |
| Int-1b    | -6706.608215  | -6705.628406  | -6709.438392  |
| TS-2b     | -6706.594786  | -6705.614708  | -6709.426473  |
| Int-2b    | -6706.619922  | -6705.647165  | -6709.450257  |
| Int-3b    | -13413.286522 | -13411.307260 | -13418.938043 |
| <b>5</b>  | -13491.806592 | -13489.771104 | -13497.539674 |
| <b>S1</b> | -5458.241481  | -5457.908667  | -5459.966869  |
| Int-4     | -5536.712686  | -5536.329716  | -5538.523175  |
| TS-4      | -5536.712216  | -5536.328279  | -5538.523058  |
| Int-5     | -5536.721033  | -5536.338576  | -5538.532698  |
| TS-5      | -5536.701165  | -5536.316713  | -5538.510968  |
| Int-6     | -5536.719254  | -5536.334515  | -5538.527250  |
| <b>S5</b> | -11152.009529 | -11151.157539 | -11155.699364 |
| <b>S2</b> | -5921.784977  | -5921.348822  | -5923.804580  |
| Int-7     | -6000.253070  | -5999.763668  | -6002.356877  |
| TS-6      | -6000.243265  | -5999.751809  | -6002.346112  |
| Int-8     | -6000.266635  | -5999.774154  | -6002.366337  |
| <b>S3</b> | -2538.893378  | -2538.751175  | -2539.648239  |
| Int-9     | -2617.363115  | -2617.170892  | -2618.203669  |
| TS-7      | -2617.323474  | -2617.129154  | -2618.163919  |
| Int-10    | -2617.375486  | -2617.180602  | -2618.213640  |
| <b>S4</b> | -2716.499710  | -2716.340917  | -2717.239331  |
| Int-11    | -2794.984567  | -2794.775193  | -2795.810825  |
| TS-8      | -2794.964681  | -2794.751177  | -2795.791255  |
| Int-12    | -2794.983301  | -2794.773898  | -2795.808654  |

<sup>a</sup> PBE0-D3BJ/def2-SVP.

<sup>b</sup> PBE0-D3BJ(benzene as solvent)/def2-TZVP//PBE0-D3BJ/def2-SVP

Cartesian coordinates of the optimized geometry of ethylene at PBE0-D3BJ/def2-SVP level of theory:

|   |             |             |             |
|---|-------------|-------------|-------------|
| C | -0.66528900 | 0.00000000  | -0.00007200 |
| C | 0.66528900  | 0.00000000  | 0.00007700  |
| H | -1.24015400 | 0.93114600  | 0.00045300  |
| H | -1.24015500 | -0.93114600 | -0.00023000 |
| H | 1.24015500  | 0.93114600  | -0.00047000 |
| H | 1.24015600  | -0.93114600 | 0.00021300  |

Cartesian coordinates of the optimized geometry of **1** at PBE0-D3BJ/def2-SVP level of theory:

|    |             |             |             |
|----|-------------|-------------|-------------|
| Ge | -1.38268600 | -0.11248800 | 0.82191200  |
| Ga | 0.60433700  | 0.52266600  | -0.49199200 |
| Cl | -1.43822100 | 0.07824500  | -1.77566400 |
| N  | 0.45914700  | 2.52338900  | -0.62503700 |
| N  | 2.00499800  | 0.38471100  | -1.84975500 |
| C  | 0.91024300  | 3.20387100  | -1.66123200 |

|   |             |             |             |
|---|-------------|-------------|-------------|
| C | 1.61661700  | 2.60702800  | -2.72902600 |
| H | 1.86037300  | 3.26984600  | -3.55855500 |
| C | 2.17997400  | 1.33482800  | -2.78305200 |
| C | 0.72262500  | 4.69213800  | -1.75440400 |
| H | -0.00967000 | 4.91922700  | -2.54384700 |
| H | 1.66917200  | 5.17124300  | -2.04111700 |
| H | 0.36429500  | 5.12633100  | -0.81392500 |
| C | 3.07869300  | 1.03018700  | -3.94826900 |
| H | 2.72084400  | 0.13890500  | -4.48296500 |
| H | 4.09881500  | 0.79829000  | -3.61067700 |
| H | 3.11765100  | 1.87512500  | -4.64536000 |
| C | -0.22861900 | 3.14541500  | 0.45963600  |
| C | 0.44874100  | 3.23994100  | 1.69745800  |
| C | -0.23586000 | 3.76855300  | 2.79270300  |
| H | 0.26904000  | 3.84751000  | 3.75626400  |
| C | -1.55479400 | 4.19541300  | 2.67699700  |
| H | -2.07573000 | 4.60577300  | 3.54523700  |
| C | -2.20736900 | 4.08898000  | 1.45784800  |
| H | -3.24798300 | 4.41139800  | 1.37514600  |
| C | -1.57317700 | 3.55628300  | 0.33022300  |
| C | 1.89827000  | 2.80805700  | 1.82361400  |
| H | 2.01988100  | 1.89569300  | 1.21136600  |
| C | 2.84011100  | 3.86914800  | 1.25123500  |
| H | 2.63101900  | 4.07685500  | 0.19292200  |
| H | 3.88911600  | 3.54282500  | 1.32701700  |
| H | 2.73748000  | 4.81457300  | 1.80724400  |
| C | 2.30262200  | 2.43503600  | 3.24363000  |
| H | 2.32124800  | 3.31242300  | 3.90925200  |
| H | 3.31421800  | 2.00469900  | 3.24676100  |
| H | 1.62077900  | 1.68575000  | 3.66996300  |
| C | -2.37061800 | 3.43259400  | -0.95609600 |
| H | -1.73528500 | 2.93450600  | -1.70319800 |
| C | -2.78787200 | 4.80299200  | -1.49622500 |
| H | -3.29133500 | 4.69383600  | -2.46957900 |
| H | -1.93578200 | 5.48427700  | -1.62687900 |
| H | -3.49811200 | 5.29548100  | -0.81299900 |
| C | -3.60807800 | 2.55305000  | -0.76926100 |
| H | -4.34695500 | 3.03416600  | -0.10812900 |
| H | -3.35430300 | 1.57654800  | -0.33670300 |
| H | -4.09403000 | 2.36816900  | -1.73925100 |
| C | 2.89529600  | -0.73233100 | -1.84277000 |
| C | 4.12273800  | -0.60372200 | -1.15539100 |
| C | 5.00618400  | -1.68625400 | -1.16110100 |
| H | 5.96134000  | -1.60118600 | -0.63630300 |
| C | 4.69501600  | -2.86344300 | -1.83319700 |
| H | 5.39933900  | -3.69868800 | -1.83207100 |
| C | 3.48308100  | -2.97375100 | -2.50354300 |
| H | 3.24081300  | -3.90206100 | -3.02654600 |
| C | 2.56279700  | -1.92070400 | -2.52272000 |
| C | 4.51801200  | 0.68147100  | -0.44973000 |
| H | 3.68663500  | 1.39247900  | -0.56318900 |
| C | 5.75293400  | 1.32005900  | -1.08625700 |
| H | 5.60598500  | 1.51438300  | -2.15892400 |
| H | 6.63876700  | 0.67335800  | -0.98317400 |
| H | 5.98336000  | 2.28091300  | -0.59992200 |
| C | 4.72477400  | 0.45938900  | 1.04580700  |
| H | 3.81430700  | 0.06440000  | 1.51779500  |
| H | 4.99342100  | 1.40408900  | 1.54332300  |
| H | 5.53888400  | -0.25773200 | 1.23840300  |
| C | 1.25741800  | -2.08429200 | -3.27676700 |
| H | 0.73528500  | -1.11588900 | -3.26246600 |
| C | 1.48825700  | -2.47462200 | -4.73736600 |
| H | 0.53385200  | -2.47718600 | -5.28581800 |
| H | 1.92113000  | -3.48356300 | -4.82613500 |
| H | 2.17041000  | -1.77842000 | -5.24894500 |
| C | 0.34227100  | -3.09574000 | -2.58856500 |
| H | 0.01317500  | -2.73915800 | -1.60167600 |
| H | 0.84405400  | -4.06708200 | -2.45380800 |
| H | -0.55882500 | -3.26624800 | -3.19486100 |

|   |             |             |             |
|---|-------------|-------------|-------------|
| C | -1.54060600 | -2.10939100 | 0.93411800  |
| C | -0.62684200 | -2.91404500 | 1.64604200  |
| C | -0.85736600 | -4.29090400 | 1.76244000  |
| H | -0.14367400 | -4.90472300 | 2.31837500  |
| C | -1.99310500 | -4.87185500 | 1.20731600  |
| H | -2.16188600 | -5.94726700 | 1.30374300  |
| C | -2.93924900 | -4.06909500 | 0.57574000  |
| H | -3.86692900 | -4.50636400 | 0.19650100  |
| C | -2.73888000 | -2.68957600 | 0.45681200  |
| C | 0.54421200  | -2.33241400 | 2.36464900  |
| C | 0.34625700  | -1.55441300 | 3.52271800  |
| C | 1.46062700  | -1.06821300 | 4.21639500  |
| H | 1.29752800  | -0.47516800 | 5.12164000  |
| C | 2.76467600  | -1.33575400 | 3.80598800  |
| C | 2.93845900  | -2.11843100 | 2.66104000  |
| H | 3.95046800  | -2.34948400 | 2.31559100  |
| C | 1.85724500  | -2.62213000 | 1.93844800  |
| C | -1.02584900 | -1.24999400 | 4.05826000  |
| H | -1.73505700 | -2.06342600 | 3.85457200  |
| H | -1.44551200 | -0.33385600 | 3.60554300  |
| H | -0.98923600 | -1.07871400 | 5.14356700  |
| C | 3.94799300  | -0.82412100 | 4.57463900  |
| H | 3.64566000  | -0.10598000 | 5.34981700  |
| H | 4.67076900  | -0.32392700 | 3.91115700  |
| H | 4.48572700  | -1.64786500 | 5.07193100  |
| C | 2.10896600  | -3.46999400 | 0.72840500  |
| H | 1.96646200  | -4.54048800 | 0.94789700  |
| H | 3.13334600  | -3.33385400 | 0.35890500  |
| H | 1.41692600  | -3.22186000 | -0.08512600 |
| C | -3.85107500 | -1.84392100 | -0.07871300 |
| C | -4.64795800 | -1.10595800 | 0.82313600  |
| C | -5.68154400 | -0.30920400 | 0.32457500  |
| H | -6.29033100 | 0.26348800  | 1.03095300  |
| C | -5.96114000 | -0.22899100 | -1.03970100 |
| C | -5.19513000 | -1.00702000 | -1.90862900 |
| H | -5.40971000 | -0.98092900 | -2.98123900 |
| C | -4.15680100 | -1.82148700 | -1.45337500 |
| C | -4.41756500 | -1.16715400 | 2.30546100  |
| H | -5.30052600 | -0.80942100 | 2.85319200  |
| H | -3.56606500 | -0.52990700 | 2.59822200  |
| H | -4.18534900 | -2.18860300 | 2.63993300  |
| C | -7.03604900 | 0.68297200  | -1.55484400 |
| H | -7.42384500 | 0.34428900  | -2.52652600 |
| H | -6.64603200 | 1.70552400  | -1.69438100 |
| H | -7.88004700 | 0.75094400  | -0.85241400 |
| C | -3.38568500 | -2.66449100 | -2.42334900 |
| H | -3.60334100 | -3.73615900 | -2.28860800 |
| H | -2.30756000 | -2.52990900 | -2.27628300 |
| H | -3.62948400 | -2.39602200 | -3.46073300 |

Cartesian coordinates of the optimized geometry of **2** at PBE0-D3BJ/def2-SVP level of theory:

|    |             |             |             |
|----|-------------|-------------|-------------|
| Ge | -1.06841700 | 0.12652300  | 0.65492600  |
| Ga | 1.18562800  | 0.32333000  | -0.54308700 |
| Cl | 1.83090400  | 0.53213600  | -2.69639900 |
| Si | -1.94202000 | -1.78854700 | -1.90587100 |
| N  | 2.78255500  | -0.66569000 | 0.10936600  |
| N  | 1.80464600  | 2.06644900  | 0.17638700  |
| N  | -2.24407000 | -0.79996900 | -0.42992400 |
| C  | 3.94471900  | -0.04138000 | 0.25779000  |
| C  | 4.10111500  | 1.35666600  | 0.18720500  |
| H  | 5.12830300  | 1.71638200  | 0.23772900  |
| C  | 3.10619900  | 2.34359700  | 0.21784400  |
| C  | 5.19440900  | -0.83772700 | 0.51412900  |
| H  | 5.71148400  | -1.02010200 | -0.44072800 |
| H  | 4.97561600  | -1.81452900 | 0.96375200  |
| H  | 5.88185800  | -0.28056000 | 1.16330500  |
| C  | 3.54615500  | 3.77859500  | 0.29000000  |

|   |             |             |             |
|---|-------------|-------------|-------------|
| H | 3.44287400  | 4.22855300  | -0.71085700 |
| H | 4.59451400  | 3.86373100  | 0.60015600  |
| H | 2.91379100  | 4.36710900  | 0.96801400  |
| C | 2.64809600  | -2.07646700 | 0.25481400  |
| C | 2.03324900  | -2.56151600 | 1.43283200  |
| C | 1.82460700  | -3.93540100 | 1.56328400  |
| H | 1.35076500  | -4.32488900 | 2.46569000  |
| C | 2.21141600  | -4.81703600 | 0.55889500  |
| H | 2.04044200  | -5.88974000 | 0.67541100  |
| C | 2.80679200  | -4.32667200 | -0.59437800 |
| H | 3.09708200  | -5.02171900 | -1.38594700 |
| C | 3.03127300  | -2.95736100 | -0.77896300 |
| C | 1.64040400  | -1.60585000 | 2.54157900  |
| H | 1.31784500  | -0.67064900 | 2.05322500  |
| C | 2.83702600  | -1.24868100 | 3.42397000  |
| H | 3.64596400  | -0.78044200 | 2.84652900  |
| H | 3.24298100  | -2.15044200 | 3.90941100  |
| H | 2.53860500  | -0.54158500 | 4.21380000  |
| C | 0.47070200  | -2.09985200 | 3.38079800  |
| H | 0.11341400  | -1.30033500 | 4.04566300  |
| H | 0.74930000  | -2.95478900 | 4.01707500  |
| H | -0.37283200 | -2.41051400 | 2.74864600  |
| C | 3.64772900  | -2.48832500 | -2.08349300 |
| H | 3.76281700  | -1.39576500 | -2.03357100 |
| C | 5.02368600  | -3.11539800 | -2.31627000 |
| H | 5.49642100  | -2.68083300 | -3.21065800 |
| H | 4.94757300  | -4.20196400 | -2.48114400 |
| H | 5.70012000  | -2.96157400 | -1.46277800 |
| C | 2.72342400  | -2.77642500 | -3.26718400 |
| H | 1.75523200  | -2.27402900 | -3.14598800 |
| H | 2.54752100  | -3.85792100 | -3.38476000 |
| H | 3.17277300  | -2.40207900 | -4.19980000 |
| C | 0.82774200  | 3.04703800  | 0.51889500  |
| C | 0.41098600  | 3.13065400  | 1.87025800  |
| C | -0.56405100 | 4.07128600  | 2.20881600  |
| H | -0.89789300 | 4.14865800  | 3.24507700  |
| C | -1.12489800 | 4.90492100  | 1.24666500  |
| H | -1.88897000 | 5.63222800  | 1.53085800  |
| C | -0.72048200 | 4.79867500  | -0.07714100 |
| H | -1.17318300 | 5.44577400  | -0.83248600 |
| C | 0.25275400  | 3.87314300  | -0.46841400 |
| C | 1.02120600  | 2.23580900  | 2.93341500  |
| H | 1.36612100  | 1.32696500  | 2.41555300  |
| C | 2.25276500  | 2.87802800  | 3.57562900  |
| H | 1.98826800  | 3.83323800  | 4.05710200  |
| H | 3.04557000  | 3.07646000  | 2.84229100  |
| H | 2.67453000  | 2.21468000  | 4.34711300  |
| C | 0.02177200  | 1.81074900  | 4.00465500  |
| H | -0.28243400 | 2.65529100  | 4.64270300  |
| H | 0.47781400  | 1.05974900  | 4.66806100  |
| H | -0.88167800 | 1.37147800  | 3.55592400  |
| C | 0.63730700  | 3.76480700  | -1.92906700 |
| H | 1.47965900  | 3.06276000  | -2.00432000 |
| C | 1.08837600  | 5.10200100  | -2.51378900 |
| H | 0.26829000  | 5.83722400  | -2.53854100 |
| H | 1.44005200  | 4.96697700  | -3.54825000 |
| H | 1.91010900  | 5.54419100  | -1.92993300 |
| C | -0.50832600 | 3.16459800  | -2.74413900 |
| H | -1.37782100 | 3.84138300  | -2.77163200 |
| H | -0.84015700 | 2.20593300  | -2.31874800 |
| H | -0.18845600 | 2.96976100  | -3.77861700 |
| C | -3.60300600 | -0.76023200 | 0.02288700  |
| C | -4.09092100 | -1.71591200 | 0.94179000  |
| C | -5.44274600 | -1.67390600 | 1.29864900  |
| H | -5.83036100 | -2.41399600 | 2.00386500  |
| C | -6.29951700 | -0.71056300 | 0.78260200  |
| H | -7.35304600 | -0.69881500 | 1.07175100  |
| C | -5.80187600 | 0.24834000  | -0.09275700 |
| H | -6.46992400 | 1.02095700  | -0.48065400 |

|   |             |             |             |
|---|-------------|-------------|-------------|
| C | -4.46135900 | 0.24378500  | -0.48354300 |
| C | -3.19558900 | -2.75403900 | 1.59081500  |
| H | -2.18594000 | -2.62212500 | 1.17312000  |
| C | -3.63125500 | -4.18644500 | 1.28665400  |
| H | -4.63626600 | -4.39757700 | 1.68519100  |
| H | -2.93495900 | -4.90679000 | 1.74432600  |
| H | -3.65458700 | -4.38245900 | 0.20486600  |
| C | -3.11298400 | -2.51439400 | 3.09933000  |
| H | -2.74266500 | -1.50149400 | 3.31855200  |
| H | -2.43737000 | -3.24063300 | 3.57776700  |
| H | -4.10192200 | -2.61828300 | 3.57280000  |
| C | -3.93010700 | 1.34421000  | -1.38039800 |
| H | -2.97125700 | 0.99472500  | -1.78712200 |
| C | -3.63722800 | 2.59476600  | -0.55052900 |
| H | -3.23346300 | 3.40295400  | -1.17871700 |
| H | -2.89927500 | 2.39117400  | 0.24361300  |
| H | -4.55111800 | 2.96324500  | -0.05751400 |
| C | -4.83728700 | 1.65603600  | -2.56608900 |
| H | -5.79623000 | 2.09823100  | -2.25263700 |
| H | -5.06116700 | 0.74954000  | -3.14931100 |
| H | -4.34999800 | 2.38047400  | -3.23716200 |
| C | -3.55516600 | -2.63163500 | -2.37227700 |
| H | -4.32924900 | -1.89039300 | -2.62316900 |
| H | -3.95517500 | -3.26606100 | -1.56921200 |
| H | -3.38674800 | -3.26305300 | -3.25984700 |
| C | -0.65045000 | -3.07860400 | -1.47997600 |
| H | 0.27729900  | -2.62787200 | -1.09676300 |
| H | -0.38541800 | -3.67769400 | -2.36509700 |
| H | -1.02824100 | -3.76474600 | -0.70608300 |
| C | -1.43101900 | -0.73912100 | -3.36869100 |
| H | -2.23972900 | -0.04932700 | -3.65572300 |
| H | -1.24351000 | -1.40561200 | -4.22697700 |
| H | -0.51195800 | -0.16115100 | -3.19858500 |

Cartesian coordinates of the optimized geometry of **3** at PBE0-D3BJ/def2-SVP level of theory:

|    |              |             |             |
|----|--------------|-------------|-------------|
| Ge | -0.96508700  | -0.48007900 | 0.39386900  |
| Ga | -5.62361500  | 0.54229400  | 0.31880200  |
| Cl | -5.91501600  | 1.39858200  | 2.36319000  |
| N  | -7.21017200  | -0.58576800 | 0.08023700  |
| N  | -6.22633900  | 2.01063000  | -0.83407600 |
| C  | -8.38533500  | -0.02678800 | -0.19936700 |
| C  | -8.53079600  | 1.30712600  | -0.61210200 |
| H  | -9.55455100  | 1.63825400  | -0.77768000 |
| C  | -7.53184700  | 2.21946300  | -0.99599700 |
| C  | -9.63358800  | -0.85413500 | -0.08537900 |
| H  | -10.49564000 | -0.33341700 | -0.51784300 |
| H  | -9.84336700  | -1.06117200 | 0.97497700  |
| H  | -9.51353200  | -1.83016700 | -0.57558100 |
| C  | -7.99405100  | 3.48761600  | -1.65473000 |
| H  | -7.87713000  | 4.33275400  | -0.96123100 |
| H  | -9.04896400  | 3.41812600  | -1.94400300 |
| H  | -7.38665500  | 3.72021000  | -2.53999300 |
| C  | -7.11384100  | -1.99690700 | 0.27359700  |
| C  | -7.34371000  | -2.57274500 | 1.54003800  |
| C  | -7.27273600  | -3.96549600 | 1.65492200  |
| H  | -7.45075100  | -4.42776000 | 2.62883400  |
| C  | -6.98050700  | -4.76900800 | 0.56011600  |
| H  | -6.93865500  | -5.85503800 | 0.67191000  |
| C  | -6.72200600  | -4.18294300 | -0.67446600 |
| H  | -6.47340800  | -4.81497000 | -1.52982500 |
| C  | -6.76902300  | -2.79658700 | -0.83844900 |
| C  | -7.62878800  | -1.73945900 | 2.77392900  |
| H  | -7.73585000  | -0.69136400 | 2.45794300  |
| C  | -8.91727300  | -2.16125400 | 3.47955400  |
| H  | -9.13638200  | -1.47678900 | 4.31338100  |
| H  | -8.83812300  | -3.17596600 | 3.90076900  |
| H  | -9.78333800  | -2.15545200 | 2.80017800  |

|   |             |             |             |
|---|-------------|-------------|-------------|
| C | -6.44219100 | -1.79048600 | 3.73680800  |
| H | -6.61874200 | -1.13243100 | 4.60109100  |
| H | -5.52061500 | -1.44909500 | 3.24798200  |
| H | -6.27487500 | -2.81345300 | 4.11120400  |
| C | -6.48665500 | -2.17908900 | -2.19424400 |
| H | -6.24863500 | -1.11897800 | -2.02006500 |
| C | -7.72374900 | -2.21873400 | -3.09263300 |
| H | -8.56040600 | -1.65212100 | -2.65932000 |
| H | -8.06150000 | -3.25585800 | -3.24889800 |
| H | -7.50257600 | -1.78246100 | -4.07902200 |
| C | -5.28390700 | -2.81373600 | -2.88613000 |
| H | -4.40741800 | -2.84746800 | -2.22281500 |
| H | -5.01344700 | -2.23606100 | -3.78328300 |
| H | -5.49451500 | -3.84301400 | -3.21677300 |
| C | -5.28115100 | 2.93732100  | -1.37766200 |
| C | -4.97507700 | 4.13322500  | -0.69466900 |
| C | -4.06420100 | 5.01706500  | -1.28365900 |
| H | -3.81825900 | 5.94825100  | -0.76775200 |
| C | -3.45234600 | 4.72436800  | -2.49277600 |
| H | -2.73052200 | 5.41937700  | -2.92758100 |
| C | -3.73971300 | 3.52701500  | -3.13914200 |
| H | -3.22991300 | 3.29553300  | -4.07385400 |
| C | -4.65489800 | 2.61611600  | -2.60572200 |
| C | -5.55521900 | 4.48254500  | 0.66297600  |
| H | -6.29177400 | 3.71119400  | 0.93052500  |
| C | -6.25186800 | 5.84394600  | 0.67291900  |
| H | -6.73345400 | 6.01769900  | 1.64753200  |
| H | -7.02468100 | 5.92880800  | -0.10577500 |
| H | -5.53612500 | 6.66532000  | 0.51060000  |
| C | -4.46542700 | 4.44419300  | 1.73444900  |
| H | -4.90329000 | 4.58505800  | 2.73435200  |
| H | -3.72739200 | 5.24598300  | 1.57141900  |
| H | -3.93415600 | 3.48335400  | 1.73920400  |
| C | -4.96772000 | 1.32095600  | -3.33876600 |
| H | -4.96662400 | 0.52018300  | -2.57901300 |
| C | -6.35145000 | 1.33093400  | -3.99496400 |
| H | -7.17025500 | 1.37557400  | -3.26595200 |
| H | -6.49393500 | 0.41355900  | -4.58688700 |
| H | -6.44799800 | 2.18791000  | -4.68054900 |
| C | -3.92176000 | 0.96040400  | -4.38737800 |
| H | -2.89856800 | 0.99913400  | -3.99120400 |
| H | -3.97399400 | 1.63739700  | -5.25503300 |
| H | -4.10247900 | -0.05769100 | -4.76251800 |
| C | -0.65153000 | -1.39260400 | 2.12100900  |
| C | -0.60311000 | -2.80206000 | 2.11408100  |
| C | -0.14161900 | -3.49020200 | 3.24159400  |
| H | -0.10970400 | -4.58269000 | 3.22142400  |
| C | 0.25700700  | -2.79314600 | 4.37855800  |
| H | 0.62812300  | -3.33482700 | 5.25267000  |
| C | 0.13317600  | -1.40687700 | 4.41843400  |
| H | 0.37885300  | -0.85698500 | 5.33084600  |
| C | -0.33820300 | -0.69682400 | 3.30640800  |
| C | -1.16159400 | -3.58091500 | 0.96746100  |
| C | -2.53966700 | -3.88851800 | 0.98352100  |
| C | -3.08701100 | -4.62572200 | -0.06846700 |
| H | -4.15982500 | -4.83288400 | -0.05795300 |
| C | -2.29754600 | -5.12038400 | -1.10852100 |
| C | -0.92986500 | -4.85067700 | -1.07542600 |
| H | -0.28335100 | -5.25096600 | -1.86027400 |
| C | -0.35070300 | -4.06425800 | -0.07587300 |
| C | -3.41891100 | -3.48776900 | 2.13278800  |
| H | -3.19321000 | -2.47719300 | 2.49570800  |
| H | -3.26491200 | -4.16016200 | 2.99348000  |
| H | -4.48053800 | -3.53642100 | 1.85480000  |
| C | -2.90317400 | -5.89169800 | -2.24511400 |
| H | -3.06861700 | -5.23857000 | -3.11927500 |
| H | -3.87745800 | -6.32085900 | -1.96954800 |
| H | -2.24665100 | -6.71143200 | -2.57354300 |
| C | 1.09993500  | -3.71377800 | -0.17601000 |



|    |             |             |             |
|----|-------------|-------------|-------------|
| H  | 1.53269300  | -3.42467700 | 0.78978200  |
| H  | 1.22361300  | -2.86838700 | -0.87261800 |
| H  | 1.68527600  | -4.55084300 | -0.57907500 |
| C  | -0.64727800 | 0.75483900  | 3.47625600  |
| C  | -1.97118600 | 1.09247900  | 3.83933000  |
| C  | -2.29702600 | 2.42843000  | 4.07353200  |
| H  | -3.33020000 | 2.67817800  | 4.33019800  |
| C  | -1.33502400 | 3.44086400  | 4.00936600  |
| C  | -0.03032700 | 3.07970300  | 3.68300300  |
| H  | 0.74628900  | 3.84725000  | 3.64346100  |
| C  | 0.32717300  | 1.76043500  | 3.38662500  |
| C  | -3.02081200 | 0.03139700  | 3.99112000  |
| H  | -3.96759900 | 0.45667000  | 4.34434300  |
| H  | -2.69560900 | -0.75971700 | 4.68385600  |
| H  | -3.22626900 | -0.46026800 | 3.02904300  |
| C  | -1.70014500 | 4.87678100  | 4.24853800  |
| H  | -0.87186900 | 5.43248900  | 4.71278400  |
| H  | -2.58382200 | 4.96860400  | 4.89640300  |
| H  | -1.94233500 | 5.38278300  | 3.29857300  |
| C  | 1.73940500  | 1.48144700  | 2.97209600  |
| H  | 2.44492100  | 1.69886400  | 3.78925400  |
| H  | 2.01008400  | 2.12424900  | 2.11903200  |
| H  | 1.87968400  | 0.43791100  | 2.66620000  |
| C  | -3.89907800 | -0.36570300 | 0.06105100  |
| H  | -3.92263500 | -1.21084500 | 0.76809500  |
| H  | -3.86358500 | -0.82774900 | -0.93811500 |
| C  | -2.67761300 | 0.52334200  | 0.29522700  |
| H  | -2.76993000 | 1.10080300  | 1.22926100  |
| H  | -2.56580200 | 1.25748200  | -0.51720000 |
| Ge | 0.96522300  | 0.48026000  | -0.39386800 |
| Ga | 5.62365500  | -0.54235500 | -0.31891300 |
| Cl | 5.91484100  | -1.39876800 | -2.36327700 |
| N  | 7.21033200  | 0.58555500  | -0.08044300 |
| N  | 6.22628700  | -2.01072300 | 0.83395600  |
| C  | 8.38544400  | 0.02646700  | 0.19916700  |
| C  | 8.53079600  | -1.30745800 | 0.61191300  |
| H  | 9.55452400  | -1.63866700 | 0.77749500  |
| C  | 7.53177200  | -2.21970000 | 0.99584200  |
| C  | 9.63377600  | 0.85369900  | 0.08518700  |
| H  | 10.49577400 | 0.33290000  | 0.51766000  |
| H  | 9.84358200  | 1.06071300  | -0.97516600 |
| H  | 9.51381000  | 1.82974500  | 0.57538400  |
| C  | 7.99385500  | -3.48789300 | 1.65458000  |
| H  | 7.87683000  | -4.33302600 | 0.96108900  |
| H  | 9.04878200  | -3.41851000 | 1.94382800  |
| H  | 7.38645500  | -3.72041200 | 2.53985900  |
| C  | 7.11412100  | 1.99671400  | -0.27376600 |
| C  | 7.34397000  | 2.57261700  | -1.54018800 |
| C  | 7.27306500  | 3.96538000  | -1.65497800 |
| H  | 7.45106600  | 4.42769500  | -2.62886900 |
| C  | 6.98093100  | 4.76884200  | -0.56010900 |
| H  | 6.93913500  | 5.85488000  | -0.67183800 |
| C  | 6.72244800  | 4.18271700  | 0.67444600  |
| H  | 6.47392100  | 4.81470500  | 1.52985300  |
| C  | 6.76939200  | 2.79634600  | 0.83833700  |
| C  | 7.62895900  | 1.73942200  | -2.77416000 |
| H  | 7.73601100  | 0.69129800  | -2.45827300 |
| C  | 8.91740800  | 2.16125200  | -3.47982900 |
| H  | 9.13643900  | 1.47686700  | -4.31374300 |
| H  | 8.83826000  | 3.17601100  | -3.90093200 |
| H  | 9.78352100  | 2.15535300  | -2.80051700 |
| C  | 6.44231000  | 1.79057400  | -3.73696900 |
| H  | 6.61877600  | 1.13256600  | -4.60130400 |
| H  | 5.52074300  | 1.44920500  | -3.24811200 |
| H  | 6.27503000  | 2.81357600  | -4.11128900 |
| C  | 6.48702600  | 2.17876700  | 2.19409800  |
| H  | 6.24894400  | 1.11868200  | 2.01983800  |
| C  | 7.72414300  | 2.21826600  | 3.09245900  |
| H  | 8.56075700  | 1.65163900  | 2.65907900  |

|   |             |             |             |
|---|-------------|-------------|-------------|
| H | 8.06196100  | 3.25535700  | 3.24880800  |
| H | 7.50296500  | 1.78192300  | 4.07881600  |
| C | 5.28433300  | 2.81343000  | 2.88606000  |
| H | 4.40782800  | 2.84726900  | 2.22277200  |
| H | 5.01386700  | 2.23570700  | 3.78318000  |
| H | 5.49501500  | 3.84267100  | 3.21677200  |
| C | 5.28099000  | -2.93727900 | 1.37758500  |
| C | 4.97464500  | -4.13306200 | 0.69450800  |
| C | 4.06363900  | -5.01678600 | 1.28347100  |
| H | 3.81746900  | -5.94786600 | 0.76748200  |
| C | 3.45189900  | -4.72407500 | 2.49264000  |
| H | 2.72995400  | -5.41897500 | 2.92741800  |
| C | 3.73951500  | -3.52682500 | 3.13908600  |
| H | 3.22979200  | -3.29532400 | 4.07383700  |
| C | 4.65486000  | -2.61605800 | 2.60571500  |
| C | 5.55455600  | -4.48231200 | -0.66325200 |
| H | 6.29107600  | -3.71095000 | -0.93087500 |
| C | 6.25119100  | -5.84371700 | -0.67338000 |
| H | 6.73263400  | -6.01741900 | -1.64807300 |
| H | 7.02411200  | -5.92863100 | 0.10520200  |
| H | 5.53546300  | -6.66509200 | -0.51100800 |
| C | 4.46457600  | -4.44388900 | -1.73453300 |
| H | 4.90226100  | -4.58466900 | -2.73452600 |
| H | 3.72658600  | -5.24570900 | -1.57143500 |
| H | 3.93328400  | -3.48306200 | -1.73911700 |
| C | 4.96791000  | -1.32101900 | 3.33888700  |
| H | 4.96716900  | -0.52019300 | 2.57919100  |
| C | 6.35149200  | -1.33139200 | 3.99538400  |
| H | 7.17044600  | -1.37621500 | 3.26655700  |
| H | 6.49408900  | -0.41407300 | 4.58736900  |
| H | 6.44766600  | -2.18841700 | 4.68096100  |
| C | 3.92183800  | -0.96026300 | 4.38731400  |
| H | 2.89871800  | -0.99867400 | 3.99092700  |
| H | 3.97370600  | -1.63735000 | 5.25491900  |
| H | 4.10276700  | 0.05774800  | 4.76258200  |
| C | 0.65174700  | 1.39283700  | -2.12097600 |
| C | 0.60346100  | 2.80229000  | -2.11400400 |
| C | 0.14209000  | 3.49050700  | -3.24152000 |
| H | 0.11026600  | 4.58299600  | -3.22132200 |
| C | -0.25658500 | 2.79351200  | -4.37851000 |
| H | -0.62763200 | 3.33525400  | -5.25261300 |
| C | -0.13293900 | 1.40722700  | -4.41840200 |
| H | -0.37868300 | 0.85737100  | -5.33081700 |
| C | 0.33836200  | 0.69710500  | -3.30638300 |
| C | 1.16182000  | 3.58104000  | -0.96725300 |
| C | 2.53993200  | 3.88849100  | -0.98299200 |
| C | 3.08712700  | 4.62554500  | 0.06917900  |
| H | 4.15996800  | 4.83258400  | 0.05892300  |
| C | 2.29749500  | 5.12019300  | 1.10911500  |
| C | 0.92979700  | 4.85061300  | 1.07572000  |
| H | 0.28315900  | 5.25088000  | 1.86047900  |
| C | 0.35076700  | 4.06434300  | 0.07597100  |
| C | 3.41938900  | 3.48771500  | -2.13208400 |
| H | 3.19367900  | 2.47717400  | -2.49509400 |
| H | 3.26562400  | 4.16015100  | -2.99278600 |
| H | 4.48096000  | 3.53625900  | -1.85386600 |
| C | 2.90295800  | 5.89135000  | 2.24590100  |
| H | 3.06813800  | 5.23813700  | 3.12004800  |
| H | 3.87734700  | 6.32043100  | 1.97058300  |
| H | 2.24644900  | 6.71112700  | 2.57425000  |
| C | -1.09991800 | 3.71395700  | 0.17578200  |
| H | -1.53248600 | 3.42495000  | -0.79012500 |
| H | -1.22380500 | 2.86853000  | 0.87230900  |
| H | -1.68528500 | 4.55104100  | 0.57876800  |
| C | 0.64721400  | -0.75461200 | -3.47619700 |
| C | 1.97102200  | -1.09250300 | -3.83942300 |
| C | 2.29658300  | -2.42851700 | -4.07365600 |
| H | 3.32967500  | -2.67846200 | -4.33046100 |
| C | 1.33440300  | -3.44077300 | -4.00936000 |

|   |             |             |             |
|---|-------------|-------------|-------------|
| C | 0.02982000  | -3.07937100 | -3.68281400 |
| H | -0.74692400 | -3.84678300 | -3.64313800 |
| C | -0.32739800 | -1.76003800 | -3.38639900 |
| C | 3.02084000  | -0.03163700 | -3.99137600 |
| H | 3.96748400  | -0.45710800 | -4.34474700 |
| H | 2.69569400  | 0.75954500  | -4.68406300 |
| H | 3.22654700  | 0.45998700  | -3.02933300 |
| C | 1.69922800  | -4.87675700 | -4.24858000 |
| H | 0.87080600  | -5.43230200 | -4.71276000 |
| H | 2.58283100  | -4.96873800 | -4.89652200 |
| H | 1.94140300  | -5.38281900 | -3.29864200 |
| C | -1.73949600 | -1.48079400 | -2.97159200 |
| H | -2.44522300 | -1.69812400 | -3.78858900 |
| H | -2.01010200 | -2.12352300 | -2.11844800 |
| H | -1.87953500 | -0.43722600 | -2.66569200 |
| C | 3.89920900  | 0.36577500  | -0.06109100 |
| H | 3.92281000  | 1.21088000  | -0.76818500 |
| H | 3.86377200  | 0.82787100  | 0.93805100  |
| C | 2.67769500  | -0.52321700 | -0.29521000 |
| H | 2.76999100  | -1.10069300 | -1.22923600 |
| H | 2.56586000  | -1.25733700 | 0.51723000  |

Cartesian coordinates of the optimized geometry of **4** at PBE0-D3BJ/def2-SVP level of theory:

|    |              |             |             |
|----|--------------|-------------|-------------|
| Ge | -0.91797500  | 0.35998000  | -0.86639500 |
| Ge | 0.92272500   | 0.37448500  | 0.87576500  |
| Ga | -5.51339900  | -0.62621200 | -0.08954900 |
| Ga | 5.51383500   | -0.62884100 | 0.08991400  |
| Cl | -5.67163000  | -2.26382700 | -1.60277000 |
| Cl | 5.67327900   | -2.25352100 | 1.61702700  |
| N  | -6.37715100  | -1.39968100 | 1.49554500  |
| N  | -6.98609800  | 0.58295500  | -0.57658300 |
| N  | 6.37736700   | -1.41887200 | -1.48746800 |
| N  | 6.98737900   | 0.58412600  | 0.56465500  |
| C  | -7.70376300  | -1.39186500 | 1.60895300  |
| C  | -8.56008800  | -0.66200600 | 0.76719300  |
| H  | -9.62379100  | -0.78426200 | 0.96358400  |
| C  | -8.23092400  | 0.31700900  | -0.18398000 |
| C  | -8.34874500  | -2.18996600 | 2.70643500  |
| H  | -7.84577300  | -2.02452200 | 3.66931000  |
| H  | -8.25971900  | -3.26441300 | 2.48865700  |
| H  | -9.41142800  | -1.93971500 | 2.80314700  |
| C  | -9.36653000  | 1.11080500  | -0.76533200 |
| H  | -10.30267100 | 0.90817600  | -0.23261200 |
| H  | -9.50120600  | 0.84969900  | -1.82529700 |
| H  | -9.15677000  | 2.18913500  | -0.73540200 |
| C  | -5.58749500  | -2.03235300 | 2.50592300  |
| C  | -5.36190300  | -3.42442900 | 2.48451000  |
| C  | -4.64517700  | -3.99190500 | 3.54384500  |
| H  | -4.46384100  | -5.06929400 | 3.54595700  |
| C  | -4.15008600  | -3.21551900 | 4.58331500  |
| H  | -3.59235600  | -3.68164100 | 5.39880200  |
| C  | -4.33581400  | -1.83725200 | 4.56291100  |
| H  | -3.90949100  | -1.22525800 | 5.35955000  |
| C  | 0.30140200   | 0.41431600  | 2.78214000  |
| C  | -5.04403500  | -1.22214000 | 3.52770300  |
| C  | -5.83465700  | -4.31615100 | 1.35171300  |
| H  | -6.45794500  | -3.71021900 | 0.67750800  |
| C  | -6.66773600  | -5.49928100 | 1.84604700  |
| H  | -6.06284500  | -6.20189200 | 2.44068000  |
| H  | -7.07556200  | -6.06105900 | 0.99174200  |
| H  | -7.51248600  | -5.18211900 | 2.47625200  |
| C  | -4.64462600  | -4.81172200 | 0.52863200  |
| H  | -3.95398800  | -5.40338000 | 1.15119400  |
| H  | -4.08690900  | -3.97619700 | 0.08497300  |
| H  | -4.98871900  | -5.44823400 | -0.30099100 |
| C  | -5.24189400  | 0.28110800  | 3.52213500  |
| H  | -5.39885000  | 0.57668300  | 2.47360400  |

|   |             |             |             |
|---|-------------|-------------|-------------|
| C | -6.49895700 | 0.68828700  | 4.29223900  |
| H | -7.40889200 | 0.25987000  | 3.84853300  |
| H | -6.61457300 | 1.78354200  | 4.29261700  |
| H | -6.44040200 | 0.35379300  | 5.34038100  |
| C | -4.01969800 | 1.03680100  | 4.03001600  |
| H | -3.86487700 | 0.89762400  | 5.11089700  |
| H | -4.14461400 | 2.11645300  | 3.86172300  |
| H | -3.09711500 | 0.71502000  | 3.52458200  |
| C | -6.73875400 | 1.72266100  | -1.40261400 |
| C | -6.90613200 | 1.65584100  | -2.80142100 |
| C | -6.73048600 | 2.82792000  | -3.54507100 |
| H | -6.86509800 | 2.79402400  | -4.62883100 |
| C | -6.38186900 | 4.02701400  | -2.93720900 |
| H | -6.25609300 | 4.93102500  | -3.53777000 |
| C | -6.16739900 | 4.06453600  | -1.56365100 |
| H | -5.86792900 | 5.00210300  | -1.09082500 |
| C | -6.33164000 | 2.92185400  | -0.77699500 |
| C | -7.21639100 | 0.36103100  | -3.52570800 |
| H | -7.40893500 | -0.41411100 | -2.76938900 |
| C | -8.44230100 | 0.46465100  | -4.43222500 |
| H | -8.67476500 | -0.51801300 | -4.87039700 |
| H | -8.27437500 | 1.16330600  | -5.26703200 |
| H | -9.33506200 | 0.81134100  | -3.88976000 |
| C | -5.99274300 | -0.09154900 | -4.32325300 |
| H | -5.11291200 | -0.18766800 | -3.67431000 |
| H | -5.75131900 | 0.62594200  | -5.12416100 |
| H | -6.17236800 | -1.07465700 | -4.78420100 |
| C | -6.11151400 | 2.98817000  | 0.72120900  |
| H | -5.90706000 | 1.96120700  | 1.05937000  |
| C | -7.36958300 | 3.45613000  | 1.45400300  |
| H | -8.21424000 | 2.77134300  | 1.29243300  |
| H | -7.67336200 | 4.45811000  | 1.11075300  |
| H | -7.18893200 | 3.50976700  | 2.53897700  |
| C | -4.90522100 | 3.83971200  | 1.10116800  |
| H | -4.69753300 | 3.74041900  | 2.17661300  |
| H | -5.07441900 | 4.91010200  | 0.90368700  |
| H | -4.00277500 | 3.53340600  | 0.55113500  |
| C | 7.70360400  | -1.41223400 | -1.60227700 |
| C | 8.56051200  | -0.67442400 | -0.76791100 |
| H | 9.62408900  | -0.79856200 | -0.96386800 |
| C | 8.23204700  | 0.31331600  | 0.17426000  |
| C | 8.34833100  | -2.22131800 | -2.69182900 |
| H | 8.27750500  | -3.29251200 | -2.45196200 |
| H | 9.40647100  | -1.95842500 | -2.80393800 |
| H | 7.83340400  | -2.08161600 | -3.65235500 |
| C | 9.36834600  | 1.11157300  | 0.74818600  |
| H | 9.50098000  | 0.86258600  | 1.81130200  |
| H | 9.16071800  | 2.18989700  | 0.70548400  |
| H | 10.30484100 | 0.90109900  | 0.21914800  |
| C | 5.58408300  | -2.06163100 | -2.48835400 |
| C | 5.36142500  | -3.45389200 | -2.45487300 |
| C | 4.63498500  | -4.03007800 | -3.50286900 |
| H | 4.45560300  | -5.10777300 | -3.49561800 |
| C | 4.12647700  | -3.26164600 | -4.54175500 |
| H | 3.55983800  | -3.73426000 | -5.34730700 |
| C | 4.31118000  | -1.88307800 | -4.53381800 |
| H | 3.87577600  | -1.27761500 | -5.33041800 |
| C | 5.03095500  | -1.25980100 | -3.51163900 |
| C | 5.84704000  | -4.33703000 | -1.32087400 |
| H | 6.47369700  | -3.72477200 | -0.65554900 |
| C | 6.67963000  | -5.52039200 | -1.81558000 |
| H | 7.09772300  | -6.07533900 | -0.96176000 |
| H | 7.51678100  | -5.20445900 | -2.45639000 |
| H | 6.07126400  | -6.22881600 | -2.39967500 |
| C | 4.66587400  | -4.83172200 | -0.48469400 |
| H | 5.01971900  | -5.45999300 | 0.34716200  |
| H | 3.97336900  | -5.43147100 | -1.09745500 |
| H | 4.10812500  | -3.99474800 | -0.04397400 |
| C | 5.23395900  | 0.24270000  | -3.52214500 |

|   |             |             |             |
|---|-------------|-------------|-------------|
| H | 5.39007600  | 0.54946000  | -2.47665000 |
| C | 6.49425700  | 0.63611200  | -4.29422700 |
| H | 7.40164700  | 0.20876100  | -3.84445800 |
| H | 6.61444800  | 1.73080600  | -4.30614800 |
| H | 6.43592400  | 0.29054800  | -5.33877100 |
| C | 4.01659000  | 0.99813900  | -4.04079600 |
| H | 3.09160900  | 0.68603100  | -3.53384800 |
| H | 3.86361000  | 0.84792000  | -5.12046900 |
| H | 4.14624000  | 2.07892800  | -3.88404200 |
| C | 6.74228300  | 1.73215900  | 1.37983200  |
| C | 6.91036600  | 1.67838600  | 2.77912800  |
| C | 6.73850400  | 2.85801600  | 3.51158100  |
| H | 6.87382500  | 2.83420900  | 4.59552100  |
| C | 6.39258200  | 4.05212900  | 2.89243600  |
| H | 6.26964400  | 4.96222900  | 3.48432900  |
| C | 6.17717700  | 4.07696500  | 1.51875900  |
| H | 5.87999100  | 5.01075900  | 1.03709700  |
| C | 6.33802500  | 2.92635200  | 0.74299000  |
| C | 7.21727600  | 0.38962400  | 3.51547000  |
| H | 7.40852500  | -0.39289900 | 2.76645800  |
| C | 8.44280200  | 0.49847600  | 4.42184900  |
| H | 8.27618600  | 1.20517800  | 5.25011500  |
| H | 9.33682300  | 0.83778300  | 3.87678000  |
| H | 8.67243400  | -0.48072300 | 4.86917000  |
| C | 5.99184800  | -0.05254200 | 4.31610400  |
| H | 6.16847100  | -1.03181000 | 4.78627500  |
| H | 5.11234800  | -0.15240500 | 3.66726500  |
| H | 5.75146000  | 0.67301800  | 5.11002200  |
| C | 6.11749700  | 2.97911000  | -0.75568300 |
| H | 5.91135700  | 1.94937700  | -1.08422700 |
| C | 7.37592800  | 3.43831400  | -1.49338900 |
| H | 8.21944500  | 2.75343200  | -1.32636800 |
| H | 7.68176900  | 4.44274600  | -1.15924900 |
| H | 7.19462800  | 3.48269300  | -2.57867600 |
| C | 4.91240200  | 3.82912100  | -1.14282500 |
| H | 4.00992300  | 3.52979800  | -0.58901000 |
| H | 4.70356100  | 3.71995900  | -2.21709000 |
| H | 5.08368600  | 4.90102600  | -0.95567300 |
| C | -3.71846300 | 0.17025200  | 0.07622800  |
| H | -3.81087600 | 1.24424100  | -0.15749900 |
| H | -3.40479800 | 0.11845700  | 1.13179600  |
| C | -2.70063200 | -0.49528200 | -0.84201700 |
| H | -3.05434700 | -0.47764900 | -1.88175900 |
| H | -2.57424800 | -1.56146100 | -0.61515800 |
| C | 3.71743200  | 0.16349900  | -0.08427800 |
| H | 3.81019900  | 1.24346200  | 0.11969000  |
| H | 3.39672300  | 0.08246000  | -1.13591800 |
| C | 2.70640800  | -0.47889700 | 0.85775200  |
| H | 3.06772600  | -0.43646600 | 1.89422000  |
| H | 2.57890300  | -1.55015900 | 0.65709300  |
| C | -0.75984800 | 2.18412500  | -0.10551400 |
| H | -1.16884300 | 3.04160200  | -0.65053400 |
| H | -1.26799300 | 2.14025400  | 0.87083800  |
| C | 0.76004600  | 2.18709900  | 0.08864800  |
| H | 1.16725800  | 3.05328000  | 0.62103600  |
| H | 1.26815300  | 2.13023000  | -0.88699800 |
| C | -0.29249000 | 0.37215300  | -2.77149100 |
| C | -0.04127200 | -0.86358300 | -3.41201600 |
| C | 0.49528100  | -0.90299600 | -4.70480600 |
| H | 0.69080200  | -1.87681000 | -5.16141400 |
| C | 0.74170800  | 0.26901500  | -5.40921600 |
| H | 1.15803100  | 0.23236600  | -6.41921500 |
| C | 0.39935100  | 1.48690600  | -4.83406200 |
| H | 0.51198800  | 2.41358000  | -5.40291700 |
| C | -0.12729200 | 1.55653900  | -3.53718200 |
| C | -0.44603100 | -2.17314100 | -2.81813000 |
| C | 0.46089900  | -2.93773700 | -2.06478500 |
| C | 0.07659900  | -4.20050200 | -1.61301200 |
| H | 0.79596100  | -4.79302600 | -1.04400700 |

|   |             |             |             |
|---|-------------|-------------|-------------|
| C | -1.19446600 | -4.71924900 | -1.86988900 |
| C | -2.08158800 | -3.94336600 | -2.61691100 |
| H | -3.08377400 | -4.32576500 | -2.83179400 |
| C | -1.72083400 | -2.69033200 | -3.12064500 |
| C | 1.83666300  | -2.41827200 | -1.79864800 |
| H | 1.80028000  | -1.36989900 | -1.47918000 |
| H | 2.45783100  | -2.45260400 | -2.70502400 |
| H | 2.34014300  | -3.00450400 | -1.02003200 |
| C | -1.60124600 | -6.06545900 | -1.34414100 |
| H | -2.09248500 | -5.97730700 | -0.36057100 |
| H | -0.73252300 | -6.72810900 | -1.21829300 |
| H | -2.31835100 | -6.56051300 | -2.01519800 |
| C | -2.68068500 | -1.96360200 | -4.01859600 |
| H | -3.71827200 | -2.17018400 | -3.72246600 |
| H | -2.55319500 | -2.29087700 | -5.06445800 |
| H | -2.52127900 | -0.87787800 | -4.00872600 |
| C | -0.61380700 | 2.89317900  | -3.08198100 |
| C | 0.27654900  | 3.92546300  | -2.73654700 |
| C | -0.23213300 | 5.12451100  | -2.22702800 |
| H | 0.47044500  | 5.90271700  | -1.91331200 |
| C | -1.60182100 | 5.34654800  | -2.09100100 |
| C | -2.47155000 | 4.34964000  | -2.53983700 |
| H | -3.55162000 | 4.50909700  | -2.48510700 |
| C | -2.00386900 | 3.13156300  | -3.03500300 |
| C | 1.75993600  | 3.77640600  | -2.90384000 |
| H | 2.29778700  | 4.46526200  | -2.23886400 |
| H | 2.06588600  | 4.00534600  | -3.93865400 |
| H | 2.10025600  | 2.75458900  | -2.69426700 |
| C | -2.12989100 | 6.59825800  | -1.45311100 |
| H | -2.33197100 | 6.43101200  | -0.38111000 |
| H | -3.07502000 | 6.92113400  | -1.91494700 |
| H | -1.41076400 | 7.42714600  | -1.52489600 |
| C | -2.99324600 | 2.10007100  | -3.49136100 |
| H | -3.08023000 | 1.27756400  | -2.76757500 |
| H | -2.69395600 | 1.64615200  | -4.44772500 |
| H | -3.99372400 | 2.53735400  | -3.60300000 |
| C | 0.13753900  | 1.60939200  | 3.53112600  |
| C | -0.38696500 | 1.55828700  | 4.82975000  |
| H | -0.49918000 | 2.49311400  | 5.38519400  |
| C | -0.72750000 | 0.34873600  | 5.42329800  |
| H | -1.14171600 | 0.32656200  | 6.43457000  |
| C | -0.48273800 | -0.83321700 | 4.73508400  |
| H | -0.67853700 | -1.80045600 | 5.20536700  |
| C | 0.05004000  | -0.81188300 | 3.44038300  |
| C | 0.62134600  | 2.93962800  | 3.05532500  |
| C | -0.27152000 | 3.96523700  | 2.69662800  |
| C | 0.23425200  | 5.15731700  | 2.16836500  |
| H | -0.47010300 | 5.92984800  | 1.84475200  |
| C | 1.60341100  | 5.37921500  | 2.02596000  |
| C | 2.47567700  | 4.39033200  | 2.48739400  |
| H | 3.55541300  | 4.55061700  | 2.42786400  |
| C | 2.01086700  | 3.17902800  | 3.00167100  |
| C | -1.75432800 | 3.81599200  | 2.86945600  |
| H | -2.09311700 | 2.79035500  | 2.67648100  |
| H | -2.29497500 | 4.49350100  | 2.19515300  |
| H | -2.05845600 | 4.06031300  | 3.90129000  |
| C | 2.12784400  | 6.62219000  | 1.36826900  |
| H | 1.41118200  | 7.45347100  | 1.43726000  |
| H | 2.31891400  | 6.44196600  | 0.29634200  |
| H | 3.07810400  | 6.94837000  | 1.81699900  |
| C | 3.00243900  | 2.15531600  | 3.47064400  |
| H | 2.70216000  | 1.70927100  | 4.43035300  |
| H | 4.00119900  | 2.59689400  | 3.58047400  |
| H | 3.09426900  | 1.32651000  | 2.75464200  |
| C | 0.44186700  | -2.12944800 | 2.85673600  |
| C | -0.47839400 | -2.89089400 | 2.11770800  |
| C | -0.10723200 | -4.15801400 | 1.66640200  |
| H | -0.83555700 | -4.74685400 | 1.10524200  |
| C | 1.16196200  | -4.68460600 | 1.91291200  |

|   |             |             |            |
|---|-------------|-------------|------------|
| C | 2.06243100  | -3.91212500 | 2.64861600 |
| H | 3.06401200  | -4.30081600 | 2.85540600 |
| C | 1.71607100  | -2.65442300 | 3.14967000 |
| C | -1.85298200 | -2.36211800 | 1.86554900 |
| H | -2.38021800 | -2.96232300 | 1.11402600 |
| H | -1.81068100 | -1.32292300 | 1.51784400 |
| H | -2.45504700 | -2.36439900 | 2.78512600 |
| C | 1.55511100  | -6.03737800 | 1.39335900 |
| H | 2.12824900  | -6.60518900 | 2.14174300 |
| H | 2.19632900  | -5.94974400 | 0.50075800 |
| H | 0.67429600  | -6.63197500 | 1.11191200 |
| C | 2.68913100  | -1.92876900 | 4.03409300 |
| H | 2.57064200  | -2.25065300 | 5.08267700 |
| H | 2.53499600  | -0.84224400 | 4.02073000 |
| H | 3.72259700  | -2.14192000 | 3.72838900 |

Cartesian coordinates of the optimized geometry of **5** at PBE0-D3BJ/def2-SVP level of theory:

|    |             |             |             |
|----|-------------|-------------|-------------|
| Ge | -0.78349400 | -0.94025700 | 1.01596700  |
| Ga | -5.24230500 | -0.11762600 | -0.47475500 |
| Cl | -6.31626900 | -1.32006300 | 1.06081900  |
| Si | 1.03111100  | -2.84137200 | 2.78752800  |
| N  | -5.86543500 | -0.84369500 | -2.19127800 |
| C  | -7.64215700 | -1.26287000 | -3.81661900 |
| H  | -7.92606200 | -2.27859600 | -3.50377700 |
| H  | -6.89816900 | -1.37957100 | -4.61722400 |
| H  | -8.52975100 | -0.75742400 | -4.21425400 |
| C  | -2.37099300 | 2.88507700  | 1.47919600  |
| H  | -3.38108900 | 2.89179600  | 1.91463000  |
| H  | -2.30023900 | 2.01668800  | 0.81313400  |
| H  | -2.27200200 | 3.78821200  | 0.86011500  |
| C  | -1.42894100 | 1.52168300  | 4.06785000  |
| H  | -0.70594900 | 1.54147000  | 4.89742000  |
| H  | -1.39694700 | 0.51432700  | 3.62671700  |
| H  | -2.43824400 | 1.67181700  | 4.48402000  |
| Ge | 0.78349900  | 0.94074100  | 1.01591000  |
| Ga | 5.24225000  | 0.11750100  | -0.47479400 |
| Cl | 6.31637000  | 1.32033500  | 1.06042500  |
| Si | -1.03097300 | 2.84194500  | 2.78761700  |
| N  | -6.26377800 | 1.55024000  | -0.58232900 |
| C  | -7.06676700 | -0.51160700 | -2.65093200 |
| N  | -0.52158700 | -2.49466500 | 2.01816300  |
| C  | -7.83999200 | 0.53326900  | -2.11031000 |
| H  | -8.83369400 | 0.65312200  | -2.53850900 |
| N  | 0.52161500  | 2.49515700  | 2.01808400  |
| C  | -7.43642900 | 1.54201100  | -1.22309300 |
| N  | 5.86536000  | 0.84320900  | -2.19151500 |
| C  | -8.38159900 | 2.69050000  | -1.01221900 |
| H  | -8.66064400 | 2.75610600  | 0.04996800  |
| H  | -9.28925200 | 2.57156000  | -1.61475000 |
| H  | -7.90519100 | 3.64852000  | -1.26388100 |
| N  | 6.26375900  | -1.55030100 | -0.58199800 |
| C  | -5.06969300 | -1.81718900 | -2.86895800 |
| C  | -4.03079300 | -1.36675400 | -3.71625400 |
| C  | -3.27640600 | -2.31883400 | -4.40605600 |
| H  | -2.47405600 | -1.99105500 | -5.06870200 |
| C  | -3.52700500 | -3.67899800 | -4.26003000 |
| H  | -2.92974000 | -4.40822200 | -4.81225000 |
| C  | -4.51486900 | -4.10544900 | -3.38404700 |
| H  | -4.68114400 | -5.17558300 | -3.23937100 |
| C  | -5.29113500 | -3.19399000 | -2.66036000 |
| C  | -3.74231600 | 0.11379100  | -3.88571600 |
| H  | -3.98251000 | 0.59512300  | -2.92456100 |
| C  | -2.27451700 | 0.40669400  | -4.18196900 |
| H  | -2.08941700 | 1.48963200  | -4.14610000 |
| H  | -1.97939000 | 0.06312700  | -5.18582700 |
| H  | -1.60747400 | -0.06963700 | -3.44849500 |
| C  | -4.64716600 | 0.75017200  | -4.94205400 |

|   |             |             |             |
|---|-------------|-------------|-------------|
| H | -5.70956100 | 0.67555600  | -4.67092700 |
| H | -4.50841200 | 0.26234800  | -5.92002100 |
| H | -4.41118200 | 1.81936800  | -5.06080300 |
| C | -6.27736500 | -3.71690400 | -1.63466700 |
| H | -6.84297400 | -2.86226200 | -1.23557900 |
| C | -5.51793900 | -4.33645200 | -0.46050100 |
| H | -4.79599900 | -3.63311200 | -0.02432200 |
| H | -4.96261000 | -5.23365800 | -0.77657900 |
| H | -6.21160900 | -4.62796900 | 0.34237900  |
| C | -7.27133700 | -4.71866000 | -2.22107200 |
| H | -8.01134100 | -5.00945500 | -1.45984800 |
| H | -6.76964300 | -5.63983000 | -2.55732500 |
| H | -7.81793700 | -4.31003200 | -3.08484000 |
| C | -5.83986200 | 2.75649400  | 0.05982000  |
| C | -6.15692200 | 3.00392500  | 1.41147800  |
| C | -5.78289900 | 4.23188500  | 1.96735800  |
| H | -6.02511100 | 4.43702700  | 3.01286800  |
| C | -5.11206300 | 5.19153600  | 1.21957200  |
| H | -4.83480500 | 6.14647800  | 1.67198900  |
| C | -4.77570300 | 4.91962400  | -0.10076100 |
| H | -4.22665000 | 5.66577600  | -0.68059400 |
| C | -0.95772300 | 4.53481100  | 3.59625600  |
| H | -1.93787500 | 4.76353100  | 4.04514500  |
| H | -0.73366300 | 5.31191500  | 2.85027000  |
| H | -0.19247200 | 4.60489100  | 4.38178500  |
| C | -5.11917000 | 3.70438200  | -0.69884800 |
| C | -6.84491700 | 1.97217600  | 2.28086300  |
| H | -7.17519000 | 1.14757100  | 1.63298300  |
| C | -5.84754000 | 1.37933500  | 3.27725500  |
| H | -5.48191900 | 2.14641300  | 3.97964400  |
| H | -4.97738100 | 0.94967100  | 2.76129600  |
| H | -6.31268100 | 0.56964500  | 3.85896300  |
| C | -8.07533800 | 2.52514100  | 2.99713800  |
| H | -7.81135000 | 3.30458400  | 3.72933500  |
| H | -8.58825700 | 1.72048900  | 3.54576400  |
| H | -8.79696600 | 2.96527400  | 2.29155500  |
| C | -4.72364300 | 3.44387000  | -2.13981600 |
| H | -4.97020000 | 2.39528300  | -2.36102400 |
| C | -3.22145200 | 3.62228600  | -2.35201400 |
| H | -2.90302900 | 4.65854900  | -2.16018600 |
| H | -2.94834100 | 3.38507700  | -3.39120500 |
| H | -2.63831000 | 2.96874500  | -1.68679400 |
| C | -5.52161700 | 4.31363500  | -3.11165000 |
| H | -5.33542700 | 5.38462500  | -2.93224900 |
| H | -6.60355300 | 4.14104300  | -3.01638700 |
| H | -5.23932700 | 4.09343500  | -4.15308900 |
| C | -3.28525300 | -0.15581200 | -0.33478200 |
| H | -2.97037400 | -0.84423200 | -1.13605300 |
| H | -2.89713300 | 0.83213500  | -0.62709100 |
| C | -2.73314800 | -0.62007300 | 1.00598800  |
| H | -3.18028500 | -1.58591000 | 1.28881100  |
| H | -2.98977100 | 0.07522300  | 1.81866700  |
| C | -1.54574700 | -3.48018500 | 2.04875700  |
| C | -1.60031100 | -4.47615100 | 1.04418000  |
| C | -2.55447100 | -5.49176800 | 1.14270200  |
| H | -2.59011200 | -6.26846200 | 0.37368700  |
| C | -3.46457800 | -5.52561700 | 2.19263700  |
| H | -4.20496000 | -6.32670800 | 2.25475300  |
| C | -3.44381800 | -4.51556300 | 3.14717800  |
| H | -4.18103600 | -4.52332700 | 3.95393400  |
| C | -2.50294800 | -3.48338700 | 3.09307700  |
| C | -0.67248000 | -4.43695700 | -0.15386200 |
| H | 0.01511100  | -3.59455600 | 0.00431700  |
| C | 0.17454800  | -5.70058600 | -0.28664900 |
| H | 0.77343900  | -5.88128400 | 0.61863400  |
| H | 0.86743900  | -5.61368700 | -1.13868900 |
| H | -0.44898600 | -6.59280400 | -0.45687100 |
| C | -1.45880400 | -4.15877500 | -1.43431400 |
| H | -2.07746500 | -3.25353600 | -1.34185000 |



|   |             |             |             |
|---|-------------|-------------|-------------|
| H | -2.14075700 | -4.98869400 | -1.67675000 |
| H | -0.78317600 | -4.01850700 | -2.29318900 |
| C | -2.53873400 | -2.38347700 | 4.13572700  |
| H | -1.86304100 | -1.59387200 | 3.77505100  |
| C | -3.93469600 | -1.78108200 | 4.29242800  |
| H | -3.89012000 | -0.87129500 | 4.91189200  |
| H | -4.62366500 | -2.48137500 | 4.79160000  |
| H | -4.38285100 | -1.51763300 | 3.32410900  |
| C | -2.00551100 | -2.85336500 | 5.48883400  |
| H | -2.01929700 | -2.02838500 | 6.21895600  |
| H | -0.97286100 | -3.22136900 | 5.41589900  |
| H | -2.62308900 | -3.67172200 | 5.89326800  |
| C | 1.42905200  | -1.52111800 | 4.06778200  |
| H | 1.39749600  | -0.51378400 | 3.62656900  |
| H | 2.43814700  | -1.67148800 | 4.48436900  |
| H | 0.70571300  | -1.54062800 | 4.89705600  |
| C | 2.37110800  | -2.88445900 | 1.47907600  |
| H | 2.30061500  | -2.01593600 | 0.81316200  |
| H | 2.27202500  | -3.78748600 | 0.85985100  |
| H | 3.38115400  | -2.89145300 | 1.91463700  |
| C | 0.95809400  | -4.53425900 | 3.59615100  |
| H | 0.19372700  | -4.60408800 | 4.38255600  |
| H | 1.93867800  | -4.76336600 | 4.04389900  |
| H | 0.73288200  | -5.31124300 | 2.85038100  |
| C | -0.13008400 | -0.75786900 | -0.87745800 |
| H | 0.80468500  | -1.32428900 | -1.00996600 |
| H | -0.83625800 | -1.10308500 | -1.64771500 |
| C | 0.13009800  | 0.75821300  | -0.87752400 |
| H | -0.80467500 | 1.32460600  | -1.01012200 |
| H | 0.83630100  | 1.10338300  | -1.64777700 |
| C | 1.54583400  | 3.48063800  | 2.04852800  |
| C | 1.60036400  | 4.47657100  | 1.04391400  |
| C | 2.55461000  | 5.49212300  | 1.14232200  |
| H | 2.59022600  | 6.26880000  | 0.37328900  |
| C | 3.46481200  | 5.52593600  | 2.19217200  |
| H | 4.20525700  | 6.32697600  | 2.25420000  |
| C | 3.44410500  | 4.51587700  | 3.14671500  |
| H | 4.18142000  | 4.52359200  | 3.95338000  |
| C | 2.50316300  | 3.48376400  | 3.09271600  |
| C | 0.67243200  | 4.43744900  | -0.15405900 |
| H | -0.01524400 | 3.59513400  | 0.00420500  |
| C | 1.45860000  | 4.15909400  | -1.43457500 |
| H | 2.14067700  | 4.98888200  | -1.67711600 |
| H | 0.78286100  | 4.01889800  | -2.29337100 |
| H | 2.07710600  | 3.25374900  | -1.34211800 |
| C | -0.17443600 | 5.70118700  | -0.28682600 |
| H | -0.77333200 | 5.88193500  | 0.61843700  |
| H | -0.86731100 | 5.61440200  | -1.13889200 |
| H | 0.44922200  | 6.59333000  | -0.45698500 |
| C | 2.53902100  | 2.38378700  | 4.13529000  |
| H | 1.86316400  | 1.59428000  | 3.77470100  |
| C | 2.00609900  | 2.85362400  | 5.48853300  |
| H | 2.62383900  | 3.67189600  | 5.89288900  |
| H | 2.01995400  | 2.02859600  | 6.21860100  |
| H | 0.97346300  | 3.22172600  | 5.41583500  |
| C | 3.93493400  | 1.78118000  | 4.29168300  |
| H | 4.62404100  | 2.48125600  | 4.79097200  |
| H | 4.38294400  | 1.51792700  | 3.32324200  |
| H | 3.89033100  | 0.87123300  | 4.91091000  |
| C | 2.73312800  | 0.62030800  | 1.00607700  |
| H | 3.18044400  | 1.58595600  | 1.28924700  |
| H | 2.98953400  | -0.07528000 | 1.81857400  |
| C | 3.28522400  | 0.15647000  | -0.33480900 |
| H | 2.97089300  | 0.84553100  | -1.13576000 |
| H | 2.89658300  | -0.83105300 | -0.62787900 |
| C | 7.64197600  | 1.26200400  | -3.81705400 |
| H | 6.89787000  | 1.37874800  | -4.61754100 |
| H | 8.52942400  | 0.75634900  | -4.21475200 |
| H | 7.92612300  | 2.27772000  | -3.50439000 |

|   |            |             |             |
|---|------------|-------------|-------------|
| C | 7.06665000 | 0.51103000  | -2.65115500 |
| C | 7.83992600 | -0.53369800 | -2.11028000 |
| H | 8.83362200 | -0.65363600 | -2.53847500 |
| C | 7.43641200 | -1.54219500 | -1.22279200 |
| C | 8.38165900 | -2.69052800 | -1.01144300 |
| H | 8.66117400 | -2.75518800 | 0.05068800  |
| H | 9.28906900 | -2.57207900 | -1.61444000 |
| H | 7.90514800 | -3.64876300 | -1.26206400 |
| C | 5.06950500 | 1.81645800  | -2.86942000 |
| C | 4.03065900 | 1.36570200  | -3.71660200 |
| C | 3.27612000 | 2.31752600  | -4.40658700 |
| H | 2.47380100 | 1.98948900  | -5.06914100 |
| C | 3.52652900 | 3.67776300  | -4.26084700 |
| H | 2.92913100 | 4.40679700  | -4.81317500 |
| C | 4.51438500 | 4.10452900  | -3.38501300 |
| H | 4.68052900 | 5.17471700  | -3.24058100 |
| C | 5.29080800 | 3.19332100  | -2.66116800 |
| C | 3.74241300 | -0.11492300 | -3.88576000 |
| H | 3.98261600 | -0.59600000 | -2.92447600 |
| C | 2.27468500 | -0.40812100 | -4.18206700 |
| H | 1.60750000 | 0.06837300  | -3.44883200 |
| H | 2.08972500 | -1.49106900 | -4.14584100 |
| H | 1.97962300 | -0.06494100 | -5.18607700 |
| C | 4.64745800 | -0.75140000 | -4.94187100 |
| H | 4.50872800 | -0.26381900 | -5.91996100 |
| H | 4.41163600 | -1.82065600 | -5.06040300 |
| H | 5.70981700 | -0.67657800 | -4.67066400 |
| C | 6.27707000 | 3.71658300  | -1.63568600 |
| H | 6.84273200 | 2.86209500  | -1.23634500 |
| C | 7.27096600 | 4.71818900  | -2.22246400 |
| H | 6.76920600 | 5.63921100  | -2.55901900 |
| H | 7.81755900 | 4.30929600  | -3.08611500 |
| H | 8.01099600 | 5.00928900  | -1.46138000 |
| C | 5.51767300 | 4.33646400  | -0.46167800 |
| H | 6.21133800 | 4.62809000  | 0.34116600  |
| H | 4.79564700 | 3.63329200  | -0.02536600 |
| H | 4.96244600 | 5.23365600  | -0.77798400 |
| C | 5.83980800 | -2.75642500 | 0.06037100  |
| C | 6.15675800 | -3.00363100 | 1.41208300  |
| C | 5.78266500 | -4.23148800 | 1.96815200  |
| H | 6.02478300 | -4.43645300 | 3.01371900  |
| C | 5.11186700 | -5.19125100 | 1.22048100  |
| H | 4.83453600 | -6.14610100 | 1.67304800  |
| C | 4.77559700 | -4.91955600 | -0.09992100 |
| H | 4.22657700 | -5.66580400 | -0.67966000 |
| C | 5.11913200 | -3.70442700 | -0.69819200 |
| C | 6.84471700 | -1.97175400 | 2.28133200  |
| H | 7.17512200 | -1.14729800 | 1.63332100  |
| C | 8.07502000 | -2.52467400 | 2.99784700  |
| H | 8.58794400 | -1.71997100 | 3.54639600  |
| H | 8.79669500 | -2.96500400 | 2.29243200  |
| H | 7.81087500 | -3.30396500 | 3.73014900  |
| C | 5.84728500 | -1.37863900 | 3.27749800  |
| H | 6.31238200 | -0.56878700 | 3.85901500  |
| H | 5.48161400 | -2.14552400 | 3.98007700  |
| H | 4.97715100 | -0.94912100 | 2.76137700  |
| C | 4.72376800 | -3.44414400 | -2.13924200 |
| H | 4.97011000 | -2.39551600 | -2.36048800 |
| C | 5.52216200 | -4.31377600 | -3.11085700 |
| H | 5.23990900 | -4.09383100 | -4.15235900 |
| H | 5.33635400 | -5.38480700 | -2.93130600 |
| H | 6.60402200 | -4.14076500 | -3.01548600 |
| C | 3.22165400 | -3.62292300 | -2.35170900 |
| H | 2.63825000 | -2.96942700 | -1.68667100 |
| H | 2.90341500 | -4.65923000 | -2.15983500 |
| H | 2.94871500 | -3.38588400 | -3.39098200 |

Cartesian coordinates of the optimized geometry of **S1** at PBE0-D3BJ/def2-SVP level of theory:

|    |             |             |             |
|----|-------------|-------------|-------------|
| Ge | -0.02926200 | -2.24328200 | -0.05047100 |
| Ga | 0.53335400  | 0.13770900  | -0.22100500 |
| Cl | 0.26300900  | -0.93873600 | 2.08245600  |
| N  | 2.33903500  | 0.88093700  | -0.04984800 |
| N  | -0.36669400 | 1.85189300  | -0.00179500 |
| C  | 2.60623400  | 2.11432500  | 0.37465300  |
| C  | 1.61711500  | 3.08180000  | 0.60611000  |
| H  | 1.96933100  | 4.04622900  | 0.96791500  |
| C  | 0.23329900  | 2.96933400  | 0.40892700  |
| C  | 4.03468500  | 2.50051100  | 0.63314900  |
| H  | 4.52238600  | 1.75339500  | 1.27685900  |
| H  | 4.09447900  | 3.48544100  | 1.11054100  |
| H  | 4.61025800  | 2.52777000  | -0.30386300 |
| C  | -0.61152200 | 4.17957500  | 0.68683000  |
| H  | -1.41921100 | 3.92883000  | 1.39053400  |
| H  | -1.10148800 | 4.53313300  | -0.23232400 |
| H  | -0.00731000 | 4.99400900  | 1.10270700  |
| C  | 3.38992500  | -0.04603900 | -0.30060400 |
| C  | 4.13745100  | 0.03187800  | -1.47993500 |
| C  | 5.13574400  | -0.90454000 | -1.73596900 |
| H  | 5.71555700  | -0.83798700 | -2.65964900 |
| C  | 5.38500700  | -1.93079400 | -0.82509300 |
| H  | 6.16361300  | -2.66874100 | -1.03074500 |
| C  | 4.62669900  | -2.01922400 | 0.34086600  |
| H  | 4.80505300  | -2.82942300 | 1.05152800  |
| C  | 3.62944700  | -1.08297400 | 0.60662500  |
| C  | -1.77897100 | 1.82666800  | -0.19949000 |
| C  | -2.33128000 | 2.29505700  | -1.39434800 |
| C  | -3.71057000 | 2.25327000  | -1.58589700 |
| H  | -4.13826800 | 2.62023400  | -2.52198500 |
| C  | -4.53923500 | 1.73666900  | -0.59172500 |
| H  | -5.61971700 | 1.69534300  | -0.74583200 |
| C  | -3.98412200 | 1.24924600  | 0.58998300  |
| H  | -4.62522300 | 0.81498000  | 1.35910500  |
| C  | -2.60676700 | 1.28604900  | 0.78793700  |
| C  | -2.02035700 | -1.95712000 | -0.09698000 |
| C  | -2.67181200 | -1.65484700 | -1.30191800 |
| C  | -4.06285100 | -1.65678000 | -1.39203600 |
| H  | -4.54712800 | -1.40760000 | -2.33999400 |
| C  | -4.83541400 | -1.96138900 | -0.27183600 |
| H  | -5.92635600 | -1.96204300 | -0.33940000 |
| C  | -4.20536800 | -2.25644300 | 0.93691300  |
| H  | -4.80319700 | -2.49277000 | 1.82183000  |
| C  | -2.81340700 | -2.25624700 | 1.02035400  |
| H  | 3.01387600  | -1.15266700 | 1.50651100  |
| H  | 3.92025300  | 0.82629500  | -2.19805600 |
| H  | -2.15584000 | 0.87989400  | 1.69581200  |
| H  | -1.66982200 | 2.68814400  | -2.17024800 |
| H  | -2.33443400 | -2.48517100 | 1.97746000  |
| H  | -2.08551200 | -1.40042200 | -2.19183100 |

Cartesian coordinates of the optimized geometry of **S2** at PBE0-D3BJ/def2-SVP level of theory:

|    |             |             |             |
|----|-------------|-------------|-------------|
| Ge | 0.63803600  | 0.71310200  | -1.00513400 |
| Ga | -1.20281100 | -0.30596800 | 0.38169400  |
| Cl | -1.70059600 | -0.70284700 | 2.53004700  |
| Si | 2.22607800  | 0.78836700  | 1.87956800  |
| N  | -1.37730700 | -2.10535200 | -0.42810700 |
| N  | -2.92522400 | 0.31338700  | -0.36380400 |
| N  | 2.11730200  | 0.88357900  | 0.08607200  |
| C  | -2.51402700 | -2.62035200 | -0.87845800 |
| C  | -3.69833000 | -1.87584400 | -1.00802900 |
| H  | -4.56975400 | -2.42420700 | -1.36243300 |
| C  | -3.87736400 | -0.49506500 | -0.81596100 |
| C  | -2.53508400 | -4.06367400 | -1.29447400 |
| H  | -2.30384600 | -4.71585800 | -0.43895900 |

|   |             |             |             |
|---|-------------|-------------|-------------|
| H | -1.75917600 | -4.25480400 | -2.05127200 |
| H | -3.51166200 | -4.34686400 | -1.70387600 |
| C | -5.22332200 | 0.08499800  | -1.15196400 |
| H | -5.56116700 | 0.76347800  | -0.35483100 |
| H | -5.96675700 | -0.70850000 | -1.29308300 |
| H | -5.17495300 | 0.68111900  | -2.07560900 |
| C | -0.17774600 | -2.85486300 | -0.34388200 |
| C | 0.80896500  | -2.69500200 | -1.32494100 |
| C | 2.04025400  | -3.33543800 | -1.19298100 |
| H | 2.80421500  | -3.19713400 | -1.96177600 |
| C | 2.29347200  | -4.14386900 | -0.08605400 |
| H | 3.25842800  | -4.64499100 | 0.01847100  |
| C | 1.31194500  | -4.30337600 | 0.89249400  |
| H | 1.51057100  | -4.92237500 | 1.77050900  |
| C | 0.08417200  | -3.65740100 | 0.77222600  |
| C | -3.09314500 | 1.71817000  | -0.29864100 |
| C | -3.07434400 | 2.49620000  | -1.46300500 |
| C | -3.16327600 | 3.88337400  | -1.37868100 |
| H | -3.14695000 | 4.48173900  | -2.29280500 |
| C | -3.25567900 | 4.50782800  | -0.13494700 |
| H | -3.31928300 | 5.59642500  | -0.07127200 |
| C | -3.25359200 | 3.73635400  | 1.02625500  |
| H | -3.31502100 | 4.21813900  | 2.00494200  |
| C | -3.17050000 | 2.34752000  | 0.95031500  |
| C | 3.32967000  | 1.12674700  | -0.61656100 |
| C | 4.25223800  | 0.08809700  | -0.80680400 |
| C | 5.44509600  | 0.31653500  | -1.48790500 |
| H | 6.15287100  | -0.50451100 | -1.62808200 |
| C | 5.73447000  | 1.58254100  | -1.99685000 |
| H | 6.66933900  | 1.76030600  | -2.53310600 |
| C | 4.81814500  | 2.61784900  | -1.81916500 |
| H | 5.03256100  | 3.61291400  | -2.21701600 |
| C | 3.62654300  | 2.39428200  | -1.13260300 |
| C | 3.92529600  | 1.43262000  | 2.35981400  |
| H | 4.08997900  | 2.45175800  | 1.97712800  |
| H | 4.73508700  | 0.79672500  | 1.97245100  |
| H | 4.00738100  | 1.46223600  | 3.45836200  |
| C | 2.03651900  | -0.98488000 | 2.45129000  |
| H | 0.99786600  | -1.33086100 | 2.34922900  |
| H | 2.30595200  | -1.06485500 | 3.51697900  |
| H | 2.68999500  | -1.65981700 | 1.87771100  |
| C | 0.92586700  | 1.90435200  | 2.64040600  |
| H | 0.95511300  | 2.90600900  | 2.18402900  |
| H | 1.12401100  | 2.01402400  | 3.71921700  |
| H | -0.08682100 | 1.48880400  | 2.53724400  |
| H | -3.15728900 | 1.73080400  | 1.85215500  |
| H | -2.96995100 | 2.00200500  | -2.43179100 |
| H | -0.67345700 | -3.73621800 | 1.55471300  |
| H | 0.59949100  | -2.06471100 | -2.19405800 |
| H | 4.01043700  | -0.90389900 | -0.41730000 |
| H | 2.90695100  | 3.20261400  | -0.98332600 |

Cartesian coordinates of the optimized geometry of **S3** at PBE0-D3BJ/def2-SVP level of theory:

|    |             |             |             |
|----|-------------|-------------|-------------|
| Ge | 0.00005700  | 1.52544800  | 0.00020900  |
| C  | -1.51702500 | 0.25177300  | 0.04508800  |
| C  | -1.48543900 | -1.01511400 | 0.65681700  |
| C  | -2.62672600 | -1.81184200 | 0.71852000  |
| H  | -2.58560300 | -2.78872500 | 1.20734700  |
| C  | -3.82100100 | -1.36602000 | 0.15064500  |
| H  | -4.71381200 | -1.99526800 | 0.19102000  |
| C  | -3.87778000 | -0.11253600 | -0.45847600 |
| H  | -4.81442800 | 0.24201300  | -0.89617200 |
| C  | -2.74095600 | 0.69246000  | -0.49028700 |
| H  | -2.80532600 | 1.68825500  | -0.94267400 |
| H  | -0.55495700 | -1.38240400 | 1.09875300  |
| C  | 1.51699000  | 0.25162800  | -0.04520600 |
| C  | 1.48517500  | -1.01558300 | -0.65626200 |

|   |            |             |             |
|---|------------|-------------|-------------|
| C | 2.74115300 | 0.69260600  | 0.48944300  |
| C | 2.62643000 | -1.81234300 | -0.71796400 |
| H | 0.55451800 | -1.38306500 | -1.09764900 |
| C | 3.87797800 | -0.11237900 | 0.45756500  |
| H | 2.80565300 | 1.68862700  | 0.94130200  |
| C | 3.82094500 | -1.36619200 | -0.15084800 |
| H | 2.58510800 | -2.78949500 | -1.20623200 |
| H | 4.81480800 | 0.24241700  | 0.89466600  |
| H | 4.71374200 | -1.99545200 | -0.19126200 |

Cartesian coordinates of the optimized geometry of **S4** at PBE0-D3BJ/def2-SVP level of theory:

|    |             |             |             |
|----|-------------|-------------|-------------|
| Ge | 0.33724700  | -1.37831200 | 0.00038400  |
| C  | -1.33391900 | -0.31579500 | 0.00014400  |
| C  | -1.44691800 | 1.08848400  | 0.00043400  |
| C  | -2.68972100 | 1.71532600  | 0.00028000  |
| H  | -2.75241100 | 2.80650200  | 0.00047300  |
| C  | -3.85673800 | 0.94876600  | -0.00009100 |
| H  | -4.83283500 | 1.44074800  | -0.00018500 |
| C  | -3.77702000 | -0.44317700 | -0.00035500 |
| H  | -4.68944700 | -1.04473200 | -0.00066600 |
| C  | -2.52904500 | -1.06301100 | -0.00024500 |
| H  | -2.47283000 | -2.15654000 | -0.00045600 |
| H  | -0.54660000 | 1.70625500  | 0.00071300  |
| Si | 2.04168300  | 0.41621600  | -0.00009400 |
| C  | 1.95133300  | 1.50295400  | 1.55132400  |
| H  | 2.77591700  | 2.23557100  | 1.54479800  |
| H  | 1.00381500  | 2.05672000  | 1.62865500  |
| H  | 2.05565000  | 0.89298800  | 2.46267400  |
| C  | 3.73091200  | -0.43448300 | -0.00004800 |
| H  | 3.85419700  | -1.07433800 | -0.88827300 |
| H  | 4.54714900  | 0.30679200  | -0.00039800 |
| H  | 3.85449700  | -1.07385000 | 0.88848400  |
| C  | 1.95039800  | 1.50141200  | -1.55253900 |
| H  | 1.00305700  | 2.05560400  | -1.62913000 |
| H  | 2.77533800  | 2.23365000  | -1.54752500 |
| H  | 2.05333200  | 0.89073000  | -2.46355500 |

Cartesian coordinates of the optimized geometry of **S5** at PBE0-D3BJ/def2-SVP level of theory:

|    |             |             |             |
|----|-------------|-------------|-------------|
| Ge | 0.50319400  | -1.19067500 | -2.28738600 |
| Ge | -0.24038200 | -2.55619300 | -0.43594400 |
| Ga | 3.35837300  | 1.23404500  | 0.31631700  |
| Ga | -3.47855900 | 0.55286600  | 0.95679000  |
| Cl | 3.72738000  | 3.41068900  | 0.65220700  |
| Cl | -4.19058900 | 0.85907100  | 3.04628900  |
| N  | 3.23868700  | 0.42858200  | 2.10153400  |
| N  | 5.07817400  | 0.43184600  | -0.15700900 |
| N  | -3.46117800 | 2.34793200  | 0.17233100  |
| N  | -5.03752300 | -0.07789500 | -0.06256200 |
| C  | 4.31838900  | -0.02119600 | 2.73191900  |
| C  | 5.58240600  | -0.15309000 | 2.12106300  |
| H  | 6.38920900  | -0.46674400 | 2.78217500  |
| C  | 5.92914200  | -0.00562500 | 0.77290100  |
| C  | 4.24057400  | -0.41825000 | 4.17993300  |
| H  | 3.93976900  | -1.47297900 | 4.27537900  |
| H  | 3.50263300  | 0.18472300  | 4.72520100  |
| H  | 5.22566100  | -0.30650200 | 4.65039400  |
| C  | 7.34133900  | -0.35034200 | 0.38572200  |
| H  | 7.99555300  | -0.30596200 | 1.26512600  |
| H  | 7.71912400  | 0.33706200  | -0.38408100 |
| H  | 7.40623400  | -1.36762900 | -0.02898300 |
| C  | 1.95981800  | 0.43176800  | 2.72164200  |
| C  | 1.24001900  | 1.62996500  | 2.80166200  |
| C  | -0.02478700 | 1.64629000  | 3.38565700  |
| H  | -0.58257800 | 2.58333100  | 3.42635100  |
| C  | -0.58439100 | 0.47658400  | 3.89770600  |

|   |             |             |             |
|---|-------------|-------------|-------------|
| H | -1.58934500 | 0.49383900  | 4.32393000  |
| C | 0.12604100  | -0.71950400 | 3.80126800  |
| H | -0.31188000 | -1.65104500 | 4.16786100  |
| C | 1.16520900  | -3.18107400 | 0.78119500  |
| C | 1.38434400  | -0.74855400 | 3.20712700  |
| C | 5.40179800  | 0.44476900  | -1.53410800 |
| C | 5.33666500  | 1.65179600  | -2.24075600 |
| C | 5.55863000  | 1.66894800  | -3.61618800 |
| H | 5.50563700  | 2.61711500  | -4.15652700 |
| C | 5.84976900  | 0.48962900  | -4.29992800 |
| H | 6.02164000  | 0.50636800  | -5.37841300 |
| C | 5.91360900  | -0.71447300 | -3.59816900 |
| H | 6.12696600  | -1.64651200 | -4.12700100 |
| C | 5.68457400  | -0.74025800 | -2.22600300 |
| C | -4.44678800 | 2.83853900  | -0.56461900 |
| C | -5.59065100 | 2.10228200  | -0.92911800 |
| H | -6.34913500 | 2.65306000  | -1.48348000 |
| C | -5.85545700 | 0.74227200  | -0.72193400 |
| C | -4.34046100 | 4.25148100  | -1.06165100 |
| H | -4.25516000 | 4.95838500  | -0.22359000 |
| H | -5.20735400 | 4.52322900  | -1.67489900 |
| H | -3.42441900 | 4.36597300  | -1.66105500 |
| C | -7.13819100 | 0.20276600  | -1.29529200 |
| H | -7.58221200 | -0.55056900 | -0.62963800 |
| H | -6.96912900 | -0.28567700 | -2.26718400 |
| H | -7.85565100 | 1.01777500  | -1.45106700 |
| C | -2.34331700 | 3.15387800  | 0.52680500  |
| C | -2.41373500 | 3.98715700  | 1.64839700  |
| C | -1.30972600 | 4.75515700  | 2.01433500  |
| H | -1.37152700 | 5.40576900  | 2.89022300  |
| C | -0.12685000 | 4.67994000  | 1.27913700  |
| H | 0.74879000  | 5.26390500  | 1.57132000  |
| C | -0.05239200 | 3.83427900  | 0.17352800  |
| H | 0.88438600  | 3.76426900  | -0.38305400 |
| C | -1.15508500 | 3.07105200  | -0.20573200 |
| C | -5.24824900 | -1.47680100 | -0.02274700 |
| C | -5.38844200 | -2.11648100 | 1.21506400  |
| C | -5.48127700 | -3.50519300 | 1.27671400  |
| H | -5.58632200 | -3.99274500 | 2.24885100  |
| C | -5.43872400 | -4.27030900 | 0.11228900  |
| H | -5.50664800 | -5.35908400 | 0.16557500  |
| C | -5.30270200 | -3.63574200 | -1.12259000 |
| H | -5.25691900 | -4.22595400 | -2.04099800 |
| C | -5.20322200 | -2.24913700 | -1.19165100 |
| C | 1.89352900  | 0.87202000  | -0.94376200 |
| H | 1.04895100  | 0.56728500  | -0.29790300 |
| H | 1.58578200  | 1.83312400  | -1.37996600 |
| C | 2.15295800  | -0.15872200 | -2.05490900 |
| H | 2.95067200  | -0.87375400 | -1.80445300 |
| H | 2.49055100  | 0.32664500  | -2.98413900 |
| C | -1.80325000 | -0.42817000 | 0.66652000  |
| H | -1.40999100 | 0.03312500  | -0.25436700 |
| H | -1.09815600 | -0.14374300 | 1.46012900  |
| C | -1.85373200 | -1.95135600 | 0.51486500  |
| H | -2.71472300 | -2.28896500 | -0.08165000 |
| H | -1.94763600 | -2.44750500 | 1.49391200  |
| C | 0.43754200  | -3.03506000 | -3.07144500 |
| H | 0.08394000  | -3.11264500 | -4.11164600 |
| H | 1.46293300  | -3.43965500 | -3.04188300 |
| C | -0.46291400 | -3.75300800 | -2.03726800 |
| H | -0.21631000 | -4.81661000 | -1.89137400 |
| H | -1.52368200 | -3.70189200 | -2.33651600 |
| C | -0.88355400 | 0.02327400  | -2.96048400 |
| C | -0.53824200 | 1.26078800  | -3.52047300 |
| C | -1.51784600 | 2.17113700  | -3.92154100 |
| H | -1.22403600 | 3.13320000  | -4.34922000 |
| C | -2.86644400 | 1.85723800  | -3.76627100 |
| H | -3.63809200 | 2.57117100  | -4.06468200 |
| C | -3.22856700 | 0.62531700  | -3.22101900 |

|   |             |             |             |
|---|-------------|-------------|-------------|
| H | -4.28520500 | 0.38310500  | -3.08933100 |
| C | -2.24735200 | -0.28026200 | -2.82537800 |
| C | 2.50548200  | -2.81155900 | 0.60010600  |
| C | 3.49958200  | -3.23825500 | 1.48090400  |
| H | 4.53344300  | -2.91714300 | 1.33045900  |
| C | 3.16702700  | -4.04910200 | 2.56579700  |
| H | 3.94177100  | -4.38341500 | 3.26058000  |
| C | 1.83820700  | -4.42979700 | 2.76137800  |
| H | 1.57056000  | -5.06392300 | 3.61058800  |
| C | 0.84997600  | -3.99772500 | 1.87693300  |
| H | -3.33508100 | 4.00786100  | 2.23441800  |
| H | -1.10619800 | 2.40653700  | -1.07094700 |
| H | -5.40793600 | -1.50916000 | 2.12343300  |
| H | -5.05768500 | -1.75677100 | -2.15528800 |
| H | 0.51504400  | 1.53002100  | -3.64013200 |
| H | -2.55359200 | -1.23154200 | -2.38014400 |
| H | -0.18749800 | -4.29789000 | 2.05377800  |
| H | 2.78253400  | -2.16005900 | -0.23125400 |
| H | 1.91865500  | -1.69219400 | 3.10275400  |
| H | 1.68483700  | 2.54894900  | 2.41271600  |
| H | 5.69064700  | -1.68874700 | -1.68405400 |
| H | 5.10966500  | 2.57188900  | -1.69567500 |

Cartesian coordinates of the optimized geometry of Int-**1a** at PBE0-D3BJ/def2-SVP level of theory:

|    |             |             |             |
|----|-------------|-------------|-------------|
| Ge | -0.08637200 | -0.97327800 | 0.70018200  |
| Ga | -0.56751900 | 0.96339100  | -0.67536900 |
| Cl | -1.81187600 | 0.63207500  | -2.49201200 |
| N  | -1.47703400 | 2.45111500  | 0.26464600  |
| N  | 0.84917400  | 2.12730100  | -1.43046300 |
| C  | -1.57370000 | 3.60560500  | -0.40222700 |
| C  | -0.69553200 | 3.98425900  | -1.42414800 |
| H  | -0.88975000 | 4.95250600  | -1.88223300 |
| C  | 0.51127000  | 3.36481500  | -1.79093500 |
| C  | -2.68262900 | 4.56211000  | -0.06514400 |
| H  | -3.61152600 | 4.19584100  | -0.53131300 |
| H  | -2.47457000 | 5.56545400  | -0.45512200 |
| H  | -2.87013800 | 4.61888300  | 1.01433500  |
| C  | 1.46011300  | 4.17998600  | -2.62417300 |
| H  | 1.51363100  | 3.77576700  | -3.64533600 |
| H  | 2.48061300  | 4.14052700  | -2.21867400 |
| H  | 1.13194300  | 5.22432500  | -2.67752000 |
| C  | -2.21598400 | 2.28421900  | 1.47803000  |
| C  | -1.61485000 | 2.66098000  | 2.70195600  |
| C  | -2.33514800 | 2.45925600  | 3.88211900  |
| H  | -1.88667500 | 2.73436100  | 4.83786100  |
| C  | -3.60974000 | 1.90256300  | 3.86460700  |
| H  | -4.14908200 | 1.74078300  | 4.80084200  |
| C  | -4.19392000 | 1.55996400  | 2.65303400  |
| H  | -5.19969300 | 1.13343700  | 2.63874600  |
| C  | -3.52027600 | 1.75615600  | 1.44317800  |
| C  | -0.23894100 | 3.30103900  | 2.74944400  |
| H  | 0.33116300  | 2.88716900  | 1.90372700  |
| C  | -0.31151200 | 4.81704600  | 2.54410000  |
| H  | -0.68324600 | 5.08642500  | 1.54747100  |
| H  | 0.68743500  | 5.26709600  | 2.65231800  |
| H  | -0.97379800 | 5.27906200  | 3.29372300  |
| C  | 0.52579800  | 2.99650300  | 4.03514000  |
| H  | 0.09413400  | 3.52449000  | 4.89984700  |
| H  | 1.56803800  | 3.33779000  | 3.94321400  |
| H  | 0.53708900  | 1.92149700  | 4.26547200  |
| C  | -4.20084200 | 1.39293800  | 0.14269700  |
| H  | -3.56735500 | 1.74641700  | -0.68336800 |
| C  | -5.56898000 | 2.05879000  | -0.00066700 |
| H  | -5.98750300 | 1.85226100  | -0.99785500 |
| H  | -5.51309600 | 3.15094000  | 0.12658600  |
| H  | -6.28831900 | 1.67716100  | 0.74122300  |
| C  | -4.31255700 | -0.11819400 | -0.00665900 |

|   |             |             |             |
|---|-------------|-------------|-------------|
| H | -4.98079700 | -0.54878000 | 0.75615300  |
| H | -3.33651200 | -0.61449000 | 0.09045900  |
| H | -4.70924100 | -0.37425900 | -0.99777500 |
| C | 2.17363800  | 1.67613100  | -1.72106000 |
| C | 3.13976500  | 1.74490000  | -0.69471200 |
| C | 4.46300600  | 1.42449300  | -1.00445300 |
| H | 5.22408200  | 1.48883500  | -0.22493800 |
| C | 4.82311000  | 1.02790600  | -2.28733100 |
| H | 5.86475400  | 0.78822900  | -2.51498700 |
| C | 3.85126300  | 0.91749900  | -3.27391100 |
| H | 4.13519400  | 0.57792400  | -4.27267100 |
| C | 2.51339100  | 1.23181700  | -3.01604000 |
| C | 2.76550100  | 2.22155000  | 0.69385400  |
| H | 1.69464700  | 2.00114600  | 0.81827200  |
| C | 2.94080500  | 3.73576300  | 0.81970100  |
| H | 2.28726800  | 4.28572600  | 0.12741700  |
| H | 3.98250500  | 4.02580700  | 0.60833500  |
| H | 2.69907600  | 4.07073300  | 1.84009700  |
| C | 3.50367100  | 1.48606600  | 1.80463800  |
| H | 3.38492100  | 0.39847000  | 1.71199100  |
| H | 3.10778400  | 1.79043500  | 2.78486700  |
| H | 4.58104100  | 1.71605000  | 1.80747400  |
| C | 1.47801400  | 1.04421300  | -4.10784100 |
| H | 0.54058000  | 1.51502700  | -3.77610300 |
| C | 1.88559800  | 1.67398000  | -5.43881800 |
| H | 1.05820100  | 1.60140300  | -6.16104700 |
| H | 2.75266000  | 1.16249900  | -5.88552400 |
| H | 2.15053700  | 2.73733100  | -5.33443700 |
| C | 1.18030100  | -0.44362700 | -4.28619100 |
| H | 0.84501000  | -0.89210900 | -3.34291500 |
| H | 2.07515100  | -0.99057300 | -4.62458400 |
| H | 0.37972600  | -0.59527500 | -5.02608300 |
| C | 0.29266600  | -2.87559800 | 0.33414100  |
| C | 1.55149400  | -3.44168300 | 0.63892700  |
| C | 1.75881500  | -4.82127900 | 0.49423600  |
| H | 2.74484900  | -5.22636800 | 0.73617300  |
| C | 0.75102000  | -5.65713700 | 0.03674400  |
| H | 0.92795300  | -6.72913000 | -0.07962700 |
| C | -0.48255300 | -5.10662300 | -0.28186500 |
| H | -1.29070900 | -5.74137800 | -0.65464000 |
| C | -0.72809300 | -3.73426000 | -0.13668100 |
| C | 2.76159500  | -2.68897000 | 1.08150500  |
| C | 3.17231400  | -2.75073700 | 2.42642900  |
| C | 4.40054000  | -2.19155600 | 2.78776000  |
| H | 4.70947800  | -2.22817900 | 3.83700600  |
| C | 5.25282700  | -1.61561900 | 1.84322200  |
| C | 4.83425000  | -1.58902400 | 0.51216600  |
| H | 5.48869400  | -1.15538800 | -0.24799000 |
| C | 3.59599700  | -2.09909600 | 0.11529400  |
| C | 2.32840100  | -3.44589300 | 3.45790400  |
| H | 2.41766100  | -4.54102600 | 3.36992800  |
| H | 1.25964200  | -3.21477700 | 3.33889300  |
| H | 2.63533900  | -3.16590900 | 4.47559000  |
| C | 6.56164300  | -1.00476100 | 2.25086200  |
| H | 6.97866900  | -1.49413100 | 3.14311100  |
| H | 6.43627800  | 0.06432300  | 2.49436400  |
| H | 7.30618600  | -1.07011600 | 1.44381900  |
| C | 3.17303600  | -2.03015200 | -1.32142600 |
| H | 2.72712700  | -2.97587000 | -1.66233300 |
| H | 4.01749300  | -1.77791500 | -1.97505300 |
| H | 2.41208500  | -1.24545500 | -1.46255900 |
| C | -2.10424600 | -3.31937800 | -0.54193800 |
| C | -3.18719200 | -3.53473100 | 0.33424400  |
| C | -4.48683200 | -3.37326100 | -0.14475200 |
| H | -5.32511200 | -3.54784000 | 0.53684900  |
| C | -4.74633200 | -2.99894300 | -1.46625200 |
| C | -3.65978600 | -2.77819700 | -2.31090100 |
| H | -3.83615500 | -2.47736000 | -3.34760000 |
| C | -2.34237800 | -2.94765300 | -1.87596100 |



|   |             |             |             |
|---|-------------|-------------|-------------|
| C | -2.95113000 | -3.97181500 | 1.75014300  |
| H | -3.89234800 | -4.01078600 | 2.31581600  |
| H | -2.26673000 | -3.28269700 | 2.26434900  |
| H | -2.48384400 | -4.96838300 | 1.79116600  |
| C | -6.15522600 | -2.79767900 | -1.94203100 |
| H | -6.22382600 | -2.85024200 | -3.03800800 |
| H | -6.53518200 | -1.80808900 | -1.63476700 |
| H | -6.83619500 | -3.55067600 | -1.51777200 |
| C | -1.20730100 | -2.82336500 | -2.84693900 |
| H | -0.87504900 | -3.81941500 | -3.18483700 |
| H | -0.33424100 | -2.34275400 | -2.38782100 |
| H | -1.49805400 | -2.23438500 | -3.72602700 |
| C | -0.85890900 | -0.82595000 | 2.51524600  |
| C | 0.58049100  | -0.39756100 | 2.46192300  |
| H | -1.62879100 | -0.07822600 | 2.72357500  |
| H | -1.05663000 | -1.79202400 | 2.99102100  |
| H | 0.77932200  | 0.67249100  | 2.54967100  |
| H | 1.33566700  | -1.00589100 | 2.96414900  |

Cartesian coordinates of the optimized geometry of Int-**1b** at PBE0-D3BJ/def2-SVP level of theory:

|    |             |             |             |
|----|-------------|-------------|-------------|
| Ge | -0.95062900 | 0.40921600  | 0.23506200  |
| Ga | 1.25727100  | 0.01215300  | -0.66332800 |
| Cl | 1.49328600  | -0.14708800 | -2.87226800 |
| Si | -2.72863900 | -1.63264800 | -1.52269000 |
| N  | 2.40160800  | -1.48411000 | -0.08260400 |
| N  | 2.52815900  | 1.41558600  | -0.17061800 |
| N  | -2.56817100 | -0.33960800 | -0.32907100 |
| C  | 3.71838900  | -1.34426500 | -0.18420900 |
| C  | 4.35359400  | -0.12360900 | -0.49122100 |
| H  | 5.42602200  | -0.18522900 | -0.67220100 |
| C  | 3.82030000  | 1.16619200  | -0.41698800 |
| C  | 4.62388400  | -2.52445900 | 0.02804800  |
| H  | 4.88666800  | -2.96216500 | -0.94733900 |
| H  | 4.14734000  | -3.30977800 | 0.62728600  |
| H  | 5.55670400  | -2.20717100 | 0.51139100  |
| C  | 4.75240200  | 2.32408800  | -0.63144100 |
| H  | 4.51893000  | 2.78619000  | -1.60411800 |
| H  | 5.79918900  | 1.99851900  | -0.64045400 |
| H  | 4.61911700  | 3.10580400  | 0.12783500  |
| C  | 1.81087000  | -2.73742700 | 0.26233900  |
| C  | 1.27546600  | -2.88502000 | 1.56200500  |
| C  | 0.67202300  | -4.09852900 | 1.89739700  |
| H  | 0.24922700  | -4.23027400 | 2.89444500  |
| C  | 0.60616900  | -5.14441800 | 0.98266900  |
| H  | 0.13222400  | -6.08777700 | 1.26335800  |
| C  | 1.13183100  | -4.98091200 | -0.29100000 |
| H  | 1.06041000  | -5.79937900 | -1.01110700 |
| C  | 1.73115000  | -3.77976600 | -0.68581400 |
| C  | 1.41105200  | -1.77370500 | 2.58414500  |
| H  | 1.33539000  | -0.82322700 | 2.03238200  |
| C  | 2.78900300  | -1.80972600 | 3.24798300  |
| H  | 3.60079900  | -1.69043100 | 2.51674700  |
| H  | 2.94316500  | -2.76589300 | 3.77278200  |
| H  | 2.88495000  | -0.99857500 | 3.98645200  |
| C  | 0.30237600  | -1.76570800 | 3.62772800  |
| H  | 0.38145100  | -0.86490800 | 4.25417500  |
| H  | 0.36121100  | -2.63463200 | 4.30206000  |
| H  | -0.68924700 | -1.75585200 | 3.15422900  |
| C  | 2.22853400  | -3.64404900 | -2.11332000 |
| H  | 2.72161800  | -2.66625300 | -2.21444000 |
| C  | 3.23584900  | -4.73622100 | -2.47693100 |
| H  | 3.66135700  | -4.54668500 | -3.47443300 |
| H  | 2.75900800  | -5.72854900 | -2.50921200 |
| H  | 4.06491100  | -4.79627400 | -1.75666100 |
| C  | 1.06185200  | -3.64762700 | -3.10176600 |
| H  | 0.35178200  | -2.83998300 | -2.88607800 |
| H  | 0.51718000  | -4.60496800 | -3.07140000 |

|   |             |             |             |
|---|-------------|-------------|-------------|
| H | 1.43107900  | -3.49756500 | -4.12780000 |
| C | 2.13055700  | 2.72132200  | 0.25037600  |
| C | 2.18315500  | 3.02335400  | 1.63215000  |
| C | 1.79208200  | 4.30001500  | 2.04317200  |
| H | 1.82142200  | 4.55601900  | 3.10335000  |
| C | 1.34316500  | 5.24683300  | 1.12775500  |
| H | 1.03093900  | 6.23523200  | 1.47274800  |
| C | 1.28130900  | 4.92689200  | -0.22175500 |
| H | 0.91750900  | 5.66910300  | -0.93624700 |
| C | 1.67741500  | 3.66876100  | -0.68762900 |
| C | 2.63839200  | 1.99342700  | 2.65385500  |
| H | 2.33402200  | 1.00949500  | 2.26131200  |
| C | 4.16017900  | 1.95916000  | 2.82088500  |
| H | 4.54265900  | 2.95246500  | 3.10567600  |
| H | 4.67714500  | 1.64069000  | 1.90734100  |
| H | 4.43869800  | 1.24957300  | 3.61567300  |
| C | 1.98750100  | 2.17939400  | 4.02307100  |
| H | 2.39719800  | 3.05442200  | 4.55175200  |
| H | 2.18759600  | 1.30195700  | 4.65691800  |
| H | 0.89810600  | 2.30887000  | 3.95285400  |
| C | 1.58374300  | 3.35511600  | -2.16632900 |
| H | 2.06139400  | 2.37967500  | -2.33491700 |
| C | 2.32044700  | 4.38118800  | -3.02580000 |
| H | 1.85011500  | 5.37578100  | -2.97156000 |
| H | 2.30959600  | 4.07015400  | -4.08172200 |
| H | 3.37066000  | 4.49507600  | -2.71551100 |
| C | 0.12448200  | 3.21823300  | -2.60129100 |
| H | -0.40462200 | 4.18151600  | -2.52311700 |
| H | -0.41458200 | 2.49565700  | -1.97101100 |
| H | 0.06236500  | 2.87101800  | -3.64361200 |
| C | -3.73175600 | 0.26284800  | 0.22357100  |
| C | -4.29797600 | -0.25068600 | 1.41874500  |
| C | -5.47417000 | 0.32351900  | 1.91052900  |
| H | -5.92464300 | -0.07692900 | 2.82215100  |
| C | -6.08182300 | 1.39401000  | 1.26537200  |
| H | -7.00260500 | 1.82629100  | 1.66452100  |
| C | -5.50393300 | 1.91639800  | 0.11460300  |
| H | -5.97632900 | 2.76631200  | -0.38536600 |
| C | -4.33134500 | 1.37540300  | -0.41990500 |
| C | -3.67167600 | -1.41483200 | 2.16866800  |
| H | -2.64970200 | -1.52837700 | 1.77442800  |
| C | -4.41654700 | -2.72778100 | 1.92112700  |
| H | -5.46181600 | -2.65643300 | 2.26303200  |
| H | -3.93777600 | -3.55366700 | 2.47145700  |
| H | -4.43181100 | -3.00015500 | 0.85858800  |
| C | -3.58122600 | -1.16568600 | 3.67469700  |
| H | -3.10021300 | -0.20576500 | 3.91121200  |
| H | -2.99845500 | -1.96440800 | 4.15954700  |
| H | -4.57642700 | -1.16112800 | 4.14651900  |
| C | -3.74586100 | 1.98445100  | -1.68154600 |
| H | -2.78505700 | 1.48048300  | -1.86214000 |
| C | -3.46739500 | 3.48046000  | -1.53609600 |
| H | -3.01133800 | 3.87249100  | -2.45841700 |
| H | -2.77675900 | 3.68763700  | -0.70745300 |
| H | -4.39337400 | 4.05065900  | -1.35940300 |
| C | -4.64212600 | 1.73627000  | -2.89569300 |
| H | -5.61971300 | 2.23058400  | -2.77597300 |
| H | -4.83097400 | 0.66561300  | -3.05308900 |
| H | -4.17521500 | 2.13480800  | -3.81036600 |
| C | -4.55289000 | -2.00910900 | -1.77759800 |
| H | -5.07064900 | -1.17296200 | -2.26822400 |
| H | -5.08927300 | -2.21805200 | -0.84260000 |
| H | -4.64344100 | -2.89167000 | -2.43161000 |
| C | -1.83707500 | -3.15242200 | -0.87871700 |
| H | -0.79576800 | -2.92186900 | -0.60942700 |
| H | -1.81047800 | -3.95858900 | -1.62803900 |
| H | -2.32577300 | -3.54066900 | 0.02712000  |
| C | -2.02007900 | -1.12330000 | -3.18521600 |
| H | -2.61232200 | -0.30297300 | -3.61929400 |

|   |             |             |             |
|---|-------------|-------------|-------------|
| H | -2.05604200 | -1.97175000 | -3.88812500 |
| H | -0.97478400 | -0.78530600 | -3.12523200 |
| C | -1.25075600 | 2.15870700  | 1.06396700  |
| C | -1.02247000 | 1.05624400  | 2.08217700  |
| H | -0.49893900 | 2.94684700  | 0.96897200  |
| H | -2.27919400 | 2.52800800  | 1.00277900  |
| H | -0.08861800 | 1.07553900  | 2.64821800  |
| H | -1.88295900 | 0.76845600  | 2.69122400  |

Cartesian coordinates of the optimized geometry of Int-**2a** at PBE0-D3BJ/def2-SVP level of theory:

|    |             |             |             |
|----|-------------|-------------|-------------|
| Ge | -2.60024500 | -0.88967200 | -1.07368300 |
| Ga | 1.41632300  | 0.91261100  | 0.45264400  |
| Cl | 0.92249600  | 1.19962600  | 2.60534300  |
| N  | 3.30967200  | 0.40853600  | 0.43663400  |
| N  | 1.67046800  | 2.72391100  | -0.26925000 |
| C  | 4.27016000  | 1.33146900  | 0.39740000  |
| C  | 4.03846700  | 2.69878400  | 0.18306200  |
| H  | 4.92208100  | 3.33463900  | 0.21118100  |
| C  | 2.84708500  | 3.33717800  | -0.20280000 |
| C  | 5.69909500  | 0.90363800  | 0.57754700  |
| H  | 6.38899100  | 1.71461900  | 0.31745400  |
| H  | 5.87386300  | 0.61821000  | 1.62522700  |
| H  | 5.93140200  | 0.01823000  | -0.03023900 |
| C  | 2.94716100  | 4.79556300  | -0.55091500 |
| H  | 2.77125800  | 5.39251600  | 0.35788500  |
| H  | 3.94837900  | 5.04191900  | -0.92525800 |
| H  | 2.19285600  | 5.09583400  | -1.28908000 |
| C  | 3.65496500  | -0.97711700 | 0.47705600  |
| C  | 3.94694300  | -1.61836700 | 1.69909500  |
| C  | 4.33026400  | -2.96401000 | 1.66041200  |
| H  | 4.56351900  | -3.47636700 | 2.59692100  |
| C  | 4.42676000  | -3.65699000 | 0.46054200  |
| H  | 4.74336700  | -4.70272600 | 0.45480000  |
| C  | 4.09756000  | -3.01995100 | -0.73134100 |
| H  | 4.14971500  | -3.57336000 | -1.67115300 |
| C  | 3.68840900  | -1.68509400 | -0.74536900 |
| C  | 3.84746600  | -0.91803500 | 3.04164100  |
| H  | 3.59775600  | 0.13705500  | 2.85429100  |
| C  | 5.16103400  | -0.97531700 | 3.82347800  |
| H  | 5.08354900  | -0.37581400 | 4.74348200  |
| H  | 5.40715200  | -2.00605900 | 4.12393500  |
| H  | 6.01378400  | -0.59382100 | 3.24198500  |
| C  | 2.70889800  | -1.50295500 | 3.87868100  |
| H  | 2.62491200  | -0.96558800 | 4.83571500  |
| H  | 1.74505700  | -1.40544700 | 3.36318900  |
| H  | 2.88355600  | -2.56821700 | 4.10069700  |
| C  | 3.31645300  | -1.01215100 | -2.05280500 |
| H  | 2.70034200  | -0.13848600 | -1.79458200 |
| C  | 4.54881200  | -0.48357200 | -2.78742200 |
| H  | 5.09864200  | 0.25329900  | -2.18429400 |
| H  | 5.24157700  | -1.30412800 | -3.03440000 |
| H  | 4.25702900  | 0.00819700  | -3.72896700 |
| C  | 2.47402200  | -1.90924500 | -2.95463400 |
| H  | 1.60484500  | -2.31786400 | -2.41850600 |
| H  | 2.10559100  | -1.33848300 | -3.82024300 |
| H  | 3.05555400  | -2.75601200 | -3.35157500 |
| C  | 0.52755700  | 3.36335700  | -0.83998000 |
| C  | -0.30012200 | 4.19398900  | -0.05832000 |
| C  | -1.42757700 | 4.75986400  | -0.66371500 |
| H  | -2.07769000 | 5.40913500  | -0.07187100 |
| C  | -1.73825900 | 4.50829600  | -1.99319900 |
| H  | -2.62255900 | 4.96160900  | -2.44753300 |
| C  | -0.92207100 | 3.67099800  | -2.74628500 |
| H  | -1.17800000 | 3.46717500  | -3.78743800 |
| C  | 0.21634700  | 3.08441600  | -2.19058100 |
| C  | -0.02537500 | 4.48264700  | 1.40433100  |
| H  | 0.88483500  | 3.93538100  | 1.69052100  |

|   |             |             |             |
|---|-------------|-------------|-------------|
| C | 0.20168700  | 5.97376500  | 1.65806300  |
| H | 0.48066500  | 6.14664700  | 2.70907400  |
| H | 0.99705100  | 6.38780600  | 1.02129200  |
| H | -0.71189800 | 6.55671700  | 1.45957400  |
| C | -1.15638100 | 3.95582500  | 2.28618500  |
| H | -0.89782900 | 4.06757600  | 3.35024500  |
| H | -2.09169700 | 4.50963400  | 2.10447400  |
| H | -1.33850200 | 2.89020700  | 2.09733300  |
| C | 1.11012700  | 2.19542300  | -3.03376600 |
| H | 1.62940700  | 1.51676800  | -2.34086700 |
| C | 2.18995000  | 3.01140400  | -3.74680200 |
| H | 2.82521600  | 3.55814000  | -3.03586100 |
| H | 2.84381800  | 2.35371900  | -4.34115600 |
| H | 1.73661000  | 3.74790200  | -4.42947600 |
| C | 0.33443700  | 1.33430800  | -4.02558700 |
| H | -0.47630100 | 0.77450800  | -3.53487400 |
| H | -0.11163500 | 1.93613700  | -4.83269200 |
| H | 1.00860900  | 0.60830300  | -4.50443300 |
| C | -3.06453100 | -2.03667200 | 0.52438400  |
| C | -2.56221700 | -3.31973100 | 0.78551800  |
| C | -3.04417100 | -4.03751900 | 1.88779000  |
| H | -2.64461500 | -5.03489900 | 2.09201600  |
| C | -4.03044100 | -3.49795100 | 2.71174500  |
| H | -4.40602600 | -4.07402900 | 3.56097900  |
| C | -4.54458700 | -2.22847600 | 2.44872300  |
| H | -5.32846900 | -1.80657300 | 3.08391100  |
| C | -4.06026200 | -1.50164500 | 1.36018000  |
| C | -1.52181400 | -3.90184300 | -0.10835200 |
| C | -0.17047800 | -3.89225900 | 0.28149000  |
| C | 0.78785100  | -4.43256900 | -0.58130000 |
| H | 1.83637100  | -4.41232800 | -0.27595600 |
| C | 0.44224700  | -4.98106200 | -1.81660600 |
| C | -0.90629800 | -4.98338900 | -2.18219400 |
| H | -1.20126400 | -5.41530200 | -3.14366200 |
| C | -1.89593300 | -4.45761100 | -1.34993600 |
| C | 0.25437500  | -3.32089900 | 1.60437000  |
| H | -0.24165200 | -2.36123600 | 1.81414700  |
| H | -0.01221400 | -3.99340200 | 2.43591000  |
| H | 1.34166800  | -3.16539100 | 1.63208800  |
| C | 1.48516100  | -5.55131800 | -2.73433300 |
| H | 1.54244200  | -4.98177300 | -3.67610900 |
| H | 2.48102000  | -5.53348100 | -2.26956300 |
| H | 1.25592200  | -6.59477400 | -3.00240100 |
| C | -3.33632700 | -4.49081400 | -1.77292900 |
| H | -3.98381400 | -4.86649200 | -0.96660100 |
| H | -3.69537300 | -3.47873900 | -2.02567200 |
| H | -3.47379200 | -5.12620600 | -2.65883600 |
| C | -4.52488500 | -0.13686700 | 0.98226100  |
| C | -4.11832400 | 0.98828900  | 1.73736500  |
| C | -4.41493200 | 2.26163500  | 1.26045600  |
| H | -4.08949300 | 3.12838400  | 1.84177700  |
| C | -5.09418400 | 2.46739000  | 0.05201200  |
| C | -5.51732800 | 1.35056700  | -0.65898900 |
| H | -6.08141600 | 1.48567700  | -1.58655900 |
| C | -5.26353200 | 0.04337800  | -0.21002000 |
| C | -3.35171600 | 0.82170300  | 3.01762800  |
| H | -3.16918400 | 1.79386500  | 3.49461100  |
| H | -3.88716800 | 0.18143300  | 3.73320900  |
| H | -2.37364800 | 0.34531900  | 2.84365000  |
| C | -5.33903500 | 3.85776300  | -0.45478600 |
| H | -6.08142400 | 3.86940200  | -1.26515100 |
| H | -5.69492800 | 4.52171700  | 0.34759900  |
| H | -4.40578000 | 4.29183100  | -0.84808000 |
| C | -5.91707500 | -1.10866800 | -0.92759500 |
| H | -6.95736900 | -1.21546800 | -0.57630700 |
| H | -5.94791000 | -0.93593700 | -2.01243800 |
| H | -5.41208300 | -2.06452700 | -0.74015900 |
| C | 0.06060800  | -0.17065700 | -0.47054100 |
| H | 0.17925500  | -1.21331300 | -0.13170800 |

|   |             |             |             |
|---|-------------|-------------|-------------|
| H | 0.26225000  | -0.18251100 | -1.55403700 |
| C | -1.34441300 | 0.37412200  | -0.16218900 |
| H | -1.51167500 | 0.43307900  | 0.92099600  |
| H | -1.47589900 | 1.38584300  | -0.57780500 |

Cartesian coordinates of the optimized geometry of Int-**2b** at PBE0-D3BJ/def2-SVP level of theory:

|    |             |             |             |
|----|-------------|-------------|-------------|
| Ge | 2.18835900  | -2.13852900 | 0.90930000  |
| Ga | -1.76761500 | 0.05246100  | -0.51891000 |
| Cl | -1.34389000 | -0.24965900 | -2.69090700 |
| Si | 5.31481300  | -2.23699900 | 0.98157300  |
| N  | -2.09350100 | 1.98068700  | -0.38119300 |
| C  | -3.41974300 | 3.96463800  | -0.91867300 |
| H  | -3.02284400 | 4.25927400  | -1.90226100 |
| H  | -2.84570400 | 4.51877800  | -0.16419800 |
| H  | -4.47367900 | 4.26311100  | -0.87123300 |
| N  | -3.63673100 | -0.48561700 | -0.31031200 |
| C  | -3.27019400 | 2.47975600  | -0.74913800 |
| N  | 3.83173100  | -1.36002800 | 0.49881800  |
| C  | -4.41194900 | 1.69348500  | -0.99231900 |
| H  | -5.29248800 | 2.23695700  | -1.33119000 |
| C  | -4.61127000 | 0.33577900  | -0.69774500 |
| C  | -6.00992000 | -0.20068100 | -0.79511700 |
| H  | -6.04438900 | -1.04193600 | -1.50267900 |
| H  | -6.71179800 | 0.57477600  | -1.12250000 |
| H  | -6.34238700 | -0.59971700 | 0.17398000  |
| C  | -1.01328000 | 2.83580300  | -0.00081100 |
| C  | -0.78937900 | 3.05378400  | 1.37862200  |
| C  | 0.26039700  | 3.89474400  | 1.75509700  |
| H  | 0.44259800  | 4.08652600  | 2.81345400  |
| C  | 1.08937200  | 4.48195400  | 0.80460800  |
| H  | 1.91102300  | 5.12941600  | 1.12010100  |
| C  | 0.87869300  | 4.22785300  | -0.54262800 |
| H  | 1.54687200  | 4.66976400  | -1.28525900 |
| C  | -0.16995200 | 3.40858300  | -0.97522200 |
| C  | -1.67447200 | 2.40448200  | 2.42816000  |
| H  | -1.96269100 | 1.41808000  | 2.03042100  |
| C  | -0.95451400 | 2.16924700  | 3.75173400  |
| H  | -1.58912500 | 1.58124700  | 4.42961500  |
| H  | -0.72509500 | 3.11411300  | 4.26865000  |
| H  | -0.01114200 | 1.62213500  | 3.60986400  |
| C  | -2.96796400 | 3.18905800  | 2.65579600  |
| H  | -3.57625900 | 3.25665600  | 1.74380800  |
| H  | -2.74878600 | 4.21335400  | 2.99720900  |
| H  | -3.58426700 | 2.69958400  | 3.42669300  |
| C  | -0.33506700 | 3.15183600  | -2.46025300 |
| H  | -1.22368500 | 2.51942100  | -2.60024800 |
| C  | 0.85930800  | 2.37099200  | -3.00649600 |
| H  | 1.03943300  | 1.45519600  | -2.42876500 |
| H  | 1.77853300  | 2.97536600  | -2.97064100 |
| H  | 0.68062200  | 2.07585600  | -4.05166200 |
| C  | -0.53156700 | 4.44568100  | -3.25180100 |
| H  | -0.73448500 | 4.21854800  | -4.30979200 |
| H  | 0.36985900  | 5.07801300  | -3.21910500 |
| H  | -1.36689700 | 5.04997100  | -2.86736800 |
| C  | -3.94879700 | -1.77620800 | 0.21720900  |
| C  | -3.99015700 | -2.90653800 | -0.62520300 |
| C  | -4.29346500 | -4.14745500 | -0.05588200 |
| H  | -4.32898000 | -5.03115500 | -0.69776200 |
| C  | -4.54678600 | -4.27878900 | 1.30348700  |
| H  | -4.78479400 | -5.25758700 | 1.72645900  |
| C  | -4.48557600 | -3.15881600 | 2.12398500  |
| H  | -4.67431300 | -3.26500400 | 3.19529800  |
| C  | -4.18153700 | -1.89787000 | 1.60460200  |
| C  | -3.69187700 | -2.82473700 | -2.10833000 |
| H  | -3.54052200 | -1.76672300 | -2.36583600 |
| C  | -2.38662200 | -3.55228500 | -2.43302500 |
| H  | -2.47292600 | -4.63367700 | -2.23865100 |

|   |             |             |             |
|---|-------------|-------------|-------------|
| H | -1.55416100 | -3.16143800 | -1.83077200 |
| H | -2.11988800 | -3.41153000 | -3.49127300 |
| C | -4.84228700 | -3.35671200 | -2.96226800 |
| H | -5.00873800 | -4.43356900 | -2.80026500 |
| H | -4.62139200 | -3.21430800 | -4.03131300 |
| H | -5.78966300 | -2.84070300 | -2.74254800 |
| C | -4.10759900 | -0.70651100 | 2.54041000  |
| H | -3.78555700 | 0.16104100  | 1.94568300  |
| C | -3.06744900 | -0.92835500 | 3.63705200  |
| H | -3.32347900 | -1.79342800 | 4.26826200  |
| H | -3.00729500 | -0.04885200 | 4.29538300  |
| H | -2.06896300 | -1.10856900 | 3.21240200  |
| C | -5.47255900 | -0.36705100 | 3.13967200  |
| H | -5.85315200 | -1.19203900 | 3.76272100  |
| H | -6.22134700 | -0.16677100 | 2.35916200  |
| H | -5.40445500 | 0.52908700  | 3.77640000  |
| C | -0.42812900 | -0.79542100 | 0.64205000  |
| H | -0.37072100 | -0.24551400 | 1.59669800  |
| H | -0.81731400 | -1.79820000 | 0.89697000  |
| C | 0.94705900  | -0.87948000 | -0.02237400 |
| H | 1.39597700  | 0.11672100  | -0.16587600 |
| H | 0.85326900  | -1.30367200 | -1.04073000 |
| C | 3.95879900  | -0.12304000 | -0.19065000 |
| C | 4.09255400  | 1.07087200  | 0.55940500  |
| C | 4.22423900  | 2.28518400  | -0.11626200 |
| H | 4.32124900  | 3.21025500  | 0.45487300  |
| C | 4.24175400  | 2.33683800  | -1.50579100 |
| H | 4.35544900  | 3.29468600  | -2.01918700 |
| C | 4.10743300  | 1.16311500  | -2.23482300 |
| H | 4.11060300  | 1.20591800  | -3.32697800 |
| C | 3.95546300  | -0.07511300 | -1.60330800 |
| C | 4.06488400  | 1.03124400  | 2.07526900  |
| H | 4.48039300  | 0.05774900  | 2.37552600  |
| C | 4.91604000  | 2.11301100  | 2.73186200  |
| H | 5.94112100  | 2.12176100  | 2.33086800  |
| H | 4.97508100  | 1.94317700  | 3.81800400  |
| H | 4.48928300  | 3.11811900  | 2.58653600  |
| C | 2.62973500  | 1.08630000  | 2.59799000  |
| H | 2.03006400  | 0.23640100  | 2.23822600  |
| H | 2.12344900  | 2.00031400  | 2.25233400  |
| H | 2.60871300  | 1.06841500  | 3.69939100  |
| C | 3.81876300  | -1.32370000 | -2.45202600 |
| H | 3.58111600  | -2.15301200 | -1.76868800 |
| C | 2.68604500  | -1.22049000 | -3.47316100 |
| H | 2.56764200  | -2.17399300 | -4.01158300 |
| H | 2.89051200  | -0.44409900 | -4.22744500 |
| H | 1.72200000  | -0.97491600 | -3.00452900 |
| C | 5.14187900  | -1.66101600 | -3.14180700 |
| H | 5.06526200  | -2.60800700 | -3.69957000 |
| H | 5.96386300  | -1.75724400 | -2.41707500 |
| H | 5.42509000  | -0.87243100 | -3.85735200 |
| C | 5.45313200  | -3.83631300 | 0.00380200  |
| H | 4.56918400  | -4.46853200 | 0.18516000  |
| H | 6.34483600  | -4.40624900 | 0.31117000  |
| H | 5.52295700  | -3.65127600 | -1.07825700 |
| C | 5.22545800  | -2.68031500 | 2.80692500  |
| H | 4.33976100  | -3.30035000 | 3.01609500  |
| H | 5.17092200  | -1.78449300 | 3.44450200  |
| H | 6.11864600  | -3.25405600 | 3.10282100  |
| C | 6.79257000  | -1.12957500 | 0.65153800  |
| H | 6.84469500  | -0.82926000 | -0.40578300 |
| H | 7.72340100  | -1.66104600 | 0.90586800  |
| H | 6.74795000  | -0.20952300 | 1.25361900  |

Cartesian coordinates of the optimized geometry of Int-**3b** at PBE0-D3BJ/def2-SVP level of theory:

|    |             |             |             |
|----|-------------|-------------|-------------|
| Ge | -1.05806000 | -0.53743700 | 2.08257500  |
| Ga | -4.99813100 | -0.10827300 | -0.64654300 |

|    |             |             |             |
|----|-------------|-------------|-------------|
| Cl | -6.32977400 | -1.24337900 | 0.73770600  |
| Si | 0.84160500  | -2.86521200 | 3.00580500  |
| N  | -5.41236300 | -0.84625000 | -2.42064000 |
| C  | -6.90635500 | -1.16330600 | -4.33205100 |
| H  | -7.24807700 | -2.18232500 | -4.10083100 |
| H  | -6.05146800 | -1.27042800 | -5.01503600 |
| H  | -7.71457100 | -0.62817100 | -4.84351700 |
| C  | -2.40140100 | 3.01843900  | 1.70475800  |
| H  | -3.36846400 | 3.08243600  | 2.22503600  |
| H  | -2.37944400 | 2.07305200  | 1.14831300  |
| H  | -2.37197900 | 3.82823400  | 0.96280700  |
| C  | -1.29514400 | 2.18595100  | 4.44005400  |
| H  | -0.57681800 | 2.42325100  | 5.23727800  |
| H  | -1.24610600 | 1.09905500  | 4.26190100  |
| H  | -2.30770800 | 2.41910600  | 4.80731800  |
| Ge | 0.54505400  | 1.03504000  | 0.95201600  |
| Ga | 4.97509100  | -0.05992600 | -0.49639200 |
| Cl | 6.08759900  | 0.99813300  | 1.11591500  |
| Si | -0.94499000 | 3.17151900  | 2.86990700  |
| N  | -5.93480400 | 1.59739300  | -0.91991700 |
| C  | -6.50050900 | -0.44937500 | -3.07428400 |
| N  | -0.72799600 | -2.35826900 | 2.31294900  |
| C  | -7.29843300 | 0.63523300  | -2.67045800 |
| H  | -8.19969500 | 0.80062700  | -3.25796100 |
| N  | 0.50378400  | 2.61371300  | 2.02086000  |
| C  | -6.99170500 | 1.63435800  | -1.73655200 |
| N  | 5.70867800  | 0.71041700  | -2.15846500 |
| C  | -7.89949600 | 2.83121400  | -1.69660100 |
| H  | -8.32315400 | 2.95145400  | -0.68898500 |
| H  | -8.71658000 | 2.72913400  | -2.41976900 |
| H  | -7.34575200 | 3.75686600  | -1.90847900 |
| N  | 5.90840600  | -1.78081900 | -0.65487700 |
| C  | -4.59624500 | -1.87400600 | -2.98365600 |
| C  | -3.41879900 | -1.49822900 | -3.66479800 |
| C  | -2.67822100 | -2.49183400 | -4.31013300 |
| H  | -1.77156300 | -2.21824300 | -4.85305600 |
| C  | -3.07656100 | -3.82308500 | -4.26939100 |
| H  | -2.49079100 | -4.58606100 | -4.78740400 |
| C  | -4.19867300 | -4.18431800 | -3.53478400 |
| H  | -4.48087300 | -5.23765300 | -3.46610900 |
| C  | -4.96980600 | -3.22884300 | -2.86583900 |
| C  | -2.97500300 | -0.04914300 | -3.71965300 |
| H  | -3.39493200 | 0.44804100  | -2.83211400 |
| C  | -1.46019800 | 0.10327200  | -3.64270600 |
| H  | -1.18621400 | 1.16278000  | -3.53527400 |
| H  | -0.96050900 | -0.26928700 | -4.54997800 |
| H  | -1.04406200 | -0.43582500 | -2.77866400 |
| C  | -3.54656300 | 0.66611400  | -4.94415000 |
| H  | -4.64632500 | 0.67113500  | -4.93525600 |
| H  | -3.21601300 | 0.17569600  | -5.87372100 |
| H  | -3.20963100 | 1.71412800  | -4.97575700 |
| C  | -6.12311800 | -3.67805900 | -1.99004400 |
| H  | -6.67674200 | -2.78371400 | -1.66802400 |
| C  | -5.57328600 | -4.33768200 | -0.72481500 |
| H  | -4.87761800 | -3.67633400 | -0.19202000 |
| H  | -5.03505600 | -5.26791900 | -0.96793700 |
| H  | -6.38851900 | -4.58345700 | -0.02748700 |
| C  | -7.09613100 | -4.61342100 | -2.70591500 |
| H  | -7.95255000 | -4.84092600 | -2.05301300 |
| H  | -6.62226000 | -5.57286200 | -2.96701300 |
| H  | -7.48959300 | -4.17788400 | -3.63732000 |
| C  | -5.57403100 | 2.80515600  | -0.24251000 |
| C  | -6.10963400 | 3.10603800  | 1.02675000  |
| C  | -5.81436700 | 4.35088800  | 1.59219100  |
| H  | -6.22632900 | 4.60019200  | 2.57307900  |
| C  | -5.01775000 | 5.27678400  | 0.92997500  |
| H  | -4.80966000 | 6.24795700  | 1.38493600  |
| C  | -4.46776600 | 4.95100200  | -0.30377700 |
| H  | -3.82034200 | 5.67054200  | -0.81166000 |

|   |             |             |             |
|---|-------------|-------------|-------------|
| C | -0.72629200 | 4.97773200  | 3.33712100  |
| H | -1.62232500 | 5.33006700  | 3.87324800  |
| H | -0.59389000 | 5.60282800  | 2.44119100  |
| H | 0.14943100  | 5.13704400  | 3.98366100  |
| C | -4.71952400 | 3.71415300  | -0.90316900 |
| C | -6.96884200 | 2.12133200  | 1.79398600  |
| H | -7.19977800 | 1.27993300  | 1.12482400  |
| C | -6.18752300 | 1.54494600  | 2.97524300  |
| H | -5.92740200 | 2.33038300  | 3.70362900  |
| H | -5.25533800 | 1.07040200  | 2.63937400  |
| H | -6.77808500 | 0.77405100  | 3.49268500  |
| C | -8.29193100 | 2.72700100  | 2.25927800  |
| H | -8.14075900 | 3.52511500  | 3.00325500  |
| H | -8.91798800 | 1.95394700  | 2.73047200  |
| H | -8.86326900 | 3.15898800  | 1.42319300  |
| C | -4.08588600 | 3.39127000  | -2.24354100 |
| H | -4.34010800 | 2.34849600  | -2.48241700 |
| C | -2.56225500 | 3.49412000  | -2.18350400 |
| H | -2.23273300 | 4.51573000  | -1.93826600 |
| H | -2.12004700 | 3.23451600  | -3.15752400 |
| H | -2.13595300 | 2.81908400  | -1.42695100 |
| C | -4.65279500 | 4.26472100  | -3.36297100 |
| H | -4.44379300 | 5.33127000  | -3.18248200 |
| H | -5.74253500 | 4.14796300  | -3.45611300 |
| H | -4.20435200 | 3.99480400  | -4.33184000 |
| C | -3.10023400 | -0.16216500 | -0.10611100 |
| H | -2.61774400 | -0.94397600 | -0.71491900 |
| H | -2.60964600 | 0.77867400  | -0.39809700 |
| C | -2.92173600 | -0.46005400 | 1.38322200  |
| H | -3.39280600 | -1.42151200 | 1.63393900  |
| H | -3.43323900 | 0.29505500  | 2.00046700  |
| C | -1.76131300 | -3.32945700 | 2.20456400  |
| C | -1.74128700 | -4.26930700 | 1.14836300  |
| C | -2.70406200 | -5.28105100 | 1.11797500  |
| H | -2.68234800 | -6.01304400 | 0.30627200  |
| C | -3.69310400 | -5.36496600 | 2.08906700  |
| H | -4.44071000 | -6.16045600 | 2.04942400  |
| C | -3.74147700 | -4.40793000 | 3.09538500  |
| H | -4.53816500 | -4.45601100 | 3.84124700  |
| C | -2.79700800 | -3.38095400 | 3.17338800  |
| C | -0.71550200 | -4.19089100 | 0.03620000  |
| H | -0.03738800 | -3.36305800 | 0.28319500  |
| C | 0.11342500  | -5.46906000 | -0.07843300 |
| H | 0.60962800  | -5.72152600 | 0.87006600  |
| H | 0.89312200  | -5.35588700 | -0.84634700 |
| H | -0.51201600 | -6.32929400 | -0.36545000 |
| C | -1.37875000 | -3.85370500 | -1.29666300 |
| H | -1.96570300 | -2.92556000 | -1.23684500 |
| H | -2.06757200 | -4.64897400 | -1.61850100 |
| H | -0.62622400 | -3.72479000 | -2.09066000 |
| C | -2.91868300 | -2.36169000 | 4.29250200  |
| H | -2.28115600 | -1.49949200 | 4.03151300  |
| C | -4.34413800 | -1.83410800 | 4.45441100  |
| H | -4.35501300 | -0.96953300 | 5.13651400  |
| H | -5.01124000 | -2.59605900 | 4.88760400  |
| H | -4.77887200 | -1.52257800 | 3.49338300  |
| C | -2.38232900 | -2.90660000 | 5.61566200  |
| H | -2.47348200 | -2.15382700 | 6.41460000  |
| H | -1.32330100 | -3.18859000 | 5.53511700  |
| H | -2.94452800 | -3.80194400 | 5.92606000  |
| C | 1.36498500  | -1.63116200 | 4.32403800  |
| H | 1.52650500  | -0.62608700 | 3.90683500  |
| H | 2.31129900  | -1.95970800 | 4.78411900  |
| H | 0.60639100  | -1.54585600 | 5.11761200  |
| C | 2.13948500  | -2.92394200 | 1.65986500  |
| H | 2.01733500  | -2.08020000 | 0.96841600  |
| H | 2.07909400  | -3.85008700 | 1.07410100  |
| H | 3.15370500  | -2.87069800 | 2.07932800  |
| C | 0.66110800  | -4.57132900 | 3.76645200  |



|   |             |             |             |
|---|-------------|-------------|-------------|
| H | -0.02488400 | -4.58079000 | 4.62535100  |
| H | 1.65010400  | -4.91409200 | 4.11146800  |
| H | 0.28240400  | -5.29986900 | 3.03489600  |
| C | 1.63381800  | 3.47503000  | 2.03620900  |
| C | 1.77346300  | 4.46269900  | 1.02760000  |
| C | 2.83951300  | 5.36071900  | 1.09619600  |
| H | 2.94598400  | 6.12781600  | 0.32579500  |
| C | 3.77273400  | 5.29504500  | 2.12553800  |
| H | 4.60268700  | 6.00456700  | 2.16182600  |
| C | 3.65267700  | 4.30767200  | 3.09367700  |
| H | 4.39620500  | 4.24386600  | 3.89228700  |
| C | 2.59598100  | 3.39186500  | 3.07059300  |
| C | 0.79905000  | 4.52333300  | -0.13250100 |
| H | -0.13266000 | 4.04854000  | 0.20968400  |
| C | 1.32346600  | 3.69804500  | -1.30818300 |
| H | 2.29722800  | 4.07325900  | -1.65811700 |
| H | 0.62066300  | 3.71823600  | -2.15666800 |
| H | 1.46572100  | 2.64180000  | -1.02842800 |
| C | 0.46081500  | 5.94332800  | -0.57500500 |
| H | 0.12410900  | 6.56201100  | 0.27091100  |
| H | -0.34325400 | 5.92630000  | -1.32744700 |
| H | 1.32220200  | 6.44949200  | -1.03890100 |
| C | 2.49513800  | 2.35038000  | 4.16606100  |
| H | 1.66971300  | 1.67870500  | 3.88228000  |
| C | 2.14111100  | 2.99411500  | 5.50748000  |
| H | 2.95821700  | 3.64569800  | 5.85701400  |
| H | 1.97159000  | 2.22603000  | 6.27907000  |
| H | 1.23596900  | 3.61419600  | 5.43719200  |
| C | 3.77105500  | 1.51868500  | 4.29687900  |
| H | 4.60575000  | 2.12290800  | 4.68706300  |
| H | 4.09565000  | 1.10753100  | 3.33166300  |
| H | 3.61584500  | 0.68292500  | 4.99746700  |
| C | 2.50051800  | 0.57645100  | 0.99201700  |
| H | 3.02349000  | 1.50125900  | 1.27801700  |
| H | 2.69631200  | -0.14054300 | 1.80422600  |
| C | 3.01113800  | 0.06338300  | -0.35311500 |
| H | 2.71642900  | 0.75692600  | -1.15960500 |
| H | 2.56151300  | -0.90606500 | -0.62545300 |
| C | 7.50732800  | 1.02361400  | -3.78764300 |
| H | 6.76434400  | 1.28760400  | -4.55282800 |
| H | 8.30502800  | 0.42562400  | -4.24335900 |
| H | 7.94136400  | 1.96961200  | -3.43205600 |
| C | 6.87186000  | 0.28866800  | -2.64203200 |
| C | 7.55792000  | -0.83648600 | -2.14935700 |
| H | 8.53437000  | -1.02256700 | -2.59324400 |
| C | 7.08070100  | -1.83777000 | -1.29349400 |
| C | 7.94377000  | -3.05593500 | -1.11945000 |
| H | 8.25960800  | -3.14280000 | -0.06914100 |
| H | 8.83508600  | -3.00139800 | -1.75482200 |
| H | 7.39018300  | -3.97657800 | -1.35154400 |
| C | 5.02731700  | 1.79851500  | -2.78381400 |
| C | 3.94574700  | 1.50668600  | -3.64435900 |
| C | 3.30686100  | 2.56465600  | -4.29500400 |
| H | 2.47433000  | 2.35650600  | -4.96939800 |
| C | 3.71302400  | 3.87955600  | -4.09528000 |
| H | 3.20477200  | 4.69492000  | -4.61527400 |
| C | 4.74733200  | 4.15334100  | -3.21038400 |
| H | 5.04132200  | 5.19016100  | -3.03036800 |
| C | 5.41721500  | 3.12999300  | -2.53085300 |
| C | 3.50224100  | 0.07616800  | -3.88266700 |
| H | 3.76836300  | -0.49400800 | -2.97987800 |
| C | 1.99448500  | -0.05193900 | -4.06502800 |
| H | 1.44787300  | 0.44042200  | -3.24771400 |
| H | 1.69886900  | -1.11137600 | -4.07473500 |
| H | 1.65260200  | 0.38722200  | -5.01533700 |
| C | 4.25874200  | -0.56021100 | -5.04908900 |
| H | 4.08968800  | 0.00413900  | -5.98005100 |
| H | 3.91947700  | -1.59516200 | -5.21359300 |
| H | 5.34185700  | -0.59200700 | -4.86296700 |

|   |            |             |             |
|---|------------|-------------|-------------|
| C | 6.48626800 | 3.49151800  | -1.51819000 |
| H | 6.95059300 | 2.55970200  | -1.16291500 |
| C | 7.57945100 | 4.38613100  | -2.10284800 |
| H | 7.18610800 | 5.37697200  | -2.37996500 |
| H | 8.04117900 | 3.95518100  | -3.00430000 |
| H | 8.37516500 | 4.54804000  | -1.35966500 |
| C | 5.84358800 | 4.15926700  | -0.30352300 |
| H | 6.59306700 | 4.34381900  | 0.48109400  |
| H | 5.05894500 | 3.53184200  | 0.13786000  |
| H | 5.39004700 | 5.12477800  | -0.57791500 |
| C | 5.40494200 | -2.97988900 | -0.06157700 |
| C | 5.74886300 | -3.33498400 | 1.25850200  |
| C | 5.31294400 | -4.57224100 | 1.74456000  |
| H | 5.57593400 | -4.86564300 | 2.76369100  |
| C | 4.55378600 | -5.43199800 | 0.96022600  |
| H | 4.23132300 | -6.39732500 | 1.35744400  |
| C | 4.18543900 | -5.04762300 | -0.32412300 |
| H | 3.56772400 | -5.71544200 | -0.92922100 |
| C | 4.58963900 | -3.81883800 | -0.85179400 |
| C | 6.52973600 | -2.40443300 | 2.16478500  |
| H | 6.90943400 | -1.57445200 | 1.55094100  |
| C | 7.72434600 | -3.08544600 | 2.82959500  |
| H | 8.31122300 | -2.34956600 | 3.40014500  |
| H | 8.39470300 | -3.55320800 | 2.09201100  |
| H | 7.41063800 | -3.87104100 | 3.53514300  |
| C | 5.60070000 | -1.78667100 | 3.21128900  |
| H | 6.14403900 | -1.05775500 | 3.83106000  |
| H | 5.17830100 | -2.55941500 | 3.87467600  |
| H | 4.76792400 | -1.24921700 | 2.73717700  |
| C | 4.17947400 | -3.42222800 | -2.25728600 |
| H | 4.40452900 | -2.35135500 | -2.36584700 |
| C | 4.99908300 | -4.16403300 | -3.31366800 |
| H | 4.69393100 | -3.86118500 | -4.32752300 |
| H | 4.85813900 | -5.25363800 | -3.22917500 |
| H | 6.07380500 | -3.95435200 | -3.21410300 |
| C | 2.68270800 | -3.60333700 | -2.49596800 |
| H | 2.08550500 | -3.07921600 | -1.73486700 |
| H | 2.39015200 | -4.66465100 | -2.48099400 |
| H | 2.40203700 | -3.20677200 | -3.48356000 |

Cartesian coordinates of the optimized geometry of Int-4 at PBE0-D3BJ/def2-SVP level of theory:

|    |             |             |             |
|----|-------------|-------------|-------------|
| Ge | -0.52255800 | -1.33529800 | -1.08120700 |
| Ga | 0.56099400  | 0.30122800  | 0.35295000  |
| Cl | 0.51524700  | 0.18759700  | 2.58230300  |
| N  | 2.38835500  | 0.84394500  | -0.06849900 |
| N  | -0.23524200 | 2.05034700  | -0.04672400 |
| C  | 2.76243000  | 2.11568300  | -0.20075900 |
| C  | 1.87059100  | 3.19757400  | -0.22055900 |
| H  | 2.32189600  | 4.18336900  | -0.32020900 |
| C  | 0.46293200  | 3.16388400  | -0.20539200 |
| C  | 4.22733700  | 2.40977700  | -0.35594400 |
| H  | 4.78952100  | 2.03501800  | 0.51254500  |
| H  | 4.40762600  | 3.48558500  | -0.46200200 |
| H  | 4.63333900  | 1.89019900  | -1.23696000 |
| C  | -0.27597100 | 4.45849700  | -0.39122400 |
| H  | -1.06194500 | 4.56457400  | 0.37093600  |
| H  | -0.78166900 | 4.47809400  | -1.36840300 |
| H  | 0.40618400  | 5.31490900  | -0.33431800 |
| C  | 3.32780200  | -0.21822900 | -0.10516300 |
| C  | 3.58261800  | -0.88249900 | -1.30983100 |
| C  | 4.43278200  | -1.98644500 | -1.33130700 |
| H  | 4.62594800  | -2.50198700 | -2.27515500 |
| C  | 5.02761500  | -2.43731100 | -0.15339100 |
| H  | 5.68837600  | -3.30684200 | -0.17105000 |
| C  | 4.76728400  | -1.78032300 | 1.04897600  |
| H  | 5.22037100  | -2.13669800 | 1.97703100  |
| C  | 3.91795600  | -0.67619000 | 1.07834700  |

|   |             |             |             |
|---|-------------|-------------|-------------|
| C | -1.64799600 | 2.00145600  | -0.17348100 |
| C | -2.23840900 | 1.98086100  | -1.44247400 |
| C | -3.61200000 | 1.79247100  | -1.56779300 |
| H | -4.06491000 | 1.76316000  | -2.56159800 |
| C | -4.40219600 | 1.61274500  | -0.43315600 |
| H | -5.47554000 | 1.43962600  | -0.53430800 |
| C | -3.81357900 | 1.63078200  | 0.82914800  |
| H | -4.42459600 | 1.47023100  | 1.71978400  |
| C | -2.44050400 | 1.82245100  | 0.96405700  |
| C | -2.28005300 | -1.70512000 | -0.21697200 |
| C | -2.52601100 | -1.64119800 | 1.16337500  |
| C | -3.80461300 | -1.85627100 | 1.67670600  |
| H | -3.96977100 | -1.80558500 | 2.75643200  |
| C | -4.87058400 | -2.12590700 | 0.81894800  |
| H | -5.87294400 | -2.29273900 | 1.22193200  |
| C | -4.65000900 | -2.17733500 | -0.55599100 |
| H | -5.47990800 | -2.38276500 | -1.23760700 |
| C | -3.36722100 | -1.96721700 | -1.06335100 |
| H | 3.67485500  | -0.17440800 | 2.01735500  |
| H | 3.09296600  | -0.53075900 | -2.22090000 |
| H | -1.95970700 | 1.79846300  | 1.94416100  |
| H | -1.60424400 | 2.08216200  | -2.32624700 |
| H | -3.21197000 | -2.00720400 | -2.14687800 |
| H | -1.71255200 | -1.40360700 | 1.85558600  |
| C | 0.68334100  | -2.56869400 | 0.38892100  |
| C | 0.46256300  | -3.14523900 | -0.89211000 |
| H | 1.67682000  | -2.19755800 | 0.65238400  |
| H | 0.02504500  | -2.79867200 | 1.22868300  |
| H | 1.29960900  | -3.23118400 | -1.58997900 |
| H | -0.31936100 | -3.90228600 | -1.00409400 |

Cartesian coordinates of the optimized geometry of Int-5 at PBE0-D3BJ/def2-SVP level of theory:

|    |             |             |             |
|----|-------------|-------------|-------------|
| Ge | 0.30219100  | -1.60622600 | 0.26645900  |
| Ga | -0.56674900 | 0.47232900  | -0.52402900 |
| Cl | -0.40565400 | 0.85839600  | -2.70022000 |
| N  | -2.38380400 | 0.88065700  | 0.04760700  |
| N  | 0.25406300  | 2.03092700  | 0.31012700  |
| C  | -2.75000700 | 2.08880600  | 0.47555200  |
| C  | -1.84458000 | 3.12941500  | 0.73309700  |
| H  | -2.28561800 | 4.07363800  | 1.04884900  |
| C  | -0.43740600 | 3.08635100  | 0.71661300  |
| C  | -4.20940700 | 2.37029700  | 0.70327100  |
| H  | -4.82543200 | 1.89924300  | -0.07589800 |
| H  | -4.39411800 | 3.45139000  | 0.70993900  |
| H  | -4.54555000 | 1.96348400  | 1.66891700  |
| C  | 0.31462100  | 4.29188900  | 1.20075300  |
| H  | 0.96126600  | 4.68730900  | 0.40324400  |
| H  | 0.98088700  | 4.01637300  | 2.03210800  |
| H  | -0.36822700 | 5.08153700  | 1.53450900  |
| C  | -3.28604000 | -0.20873700 | -0.03813300 |
| C  | -3.86216000 | -0.75856600 | 1.11359400  |
| C  | -4.67268600 | -1.88648200 | 1.02035700  |
| H  | -5.11222100 | -2.31151800 | 1.92576700  |
| C  | -4.90461200 | -2.48526300 | -0.21796400 |
| H  | -5.53292200 | -3.37589100 | -0.28741700 |
| C  | -4.31890200 | -1.94872900 | -1.36363200 |
| H  | -4.48689200 | -2.41685700 | -2.33622300 |
| C  | -3.51169800 | -0.81638200 | -1.27910600 |
| C  | 1.67458600  | 1.98484300  | 0.34759700  |
| C  | 2.31777100  | 1.36103900  | 1.42128100  |
| C  | 3.70262700  | 1.21576800  | 1.41452800  |
| H  | 4.19663500  | 0.70712500  | 2.24504100  |
| C  | 4.45123800  | 1.69194600  | 0.34016600  |
| H  | 5.53562900  | 1.56347000  | 0.33037200  |
| C  | 3.80967200  | 2.30864000  | -0.73301300 |
| H  | 4.39056000  | 2.66823900  | -1.58562600 |
| C  | 2.42378000  | 2.44911600  | -0.73817500 |

|   |             |             |             |
|---|-------------|-------------|-------------|
| C | 2.20196000  | -1.91364700 | 0.00857500  |
| C | 2.83718200  | -1.31583800 | -1.08918000 |
| C | 4.21111400  | -1.45306800 | -1.27926400 |
| H | 4.68916700  | -0.97557000 | -2.13826800 |
| C | 4.97258200  | -2.19160000 | -0.37499300 |
| H | 6.05022600  | -2.29891100 | -0.52225200 |
| C | 4.35218400  | -2.79269200 | 0.72045800  |
| H | 4.94371200  | -3.37242600 | 1.43413400  |
| C | 2.97843100  | -2.65204600 | 0.91109700  |
| H | -3.03896800 | -0.39444500 | -2.16947900 |
| H | -3.64629500 | -0.30983700 | 2.08581900  |
| H | 1.90422100  | 2.89026500  | -1.59127900 |
| H | 1.71662400  | 0.96846100  | 2.24443200  |
| H | 2.50937200  | -3.11812400 | 1.78230100  |
| H | 2.25499400  | -0.72688600 | -1.80513700 |
| C | -0.80837200 | -3.19292400 | 0.56989600  |
| C | -0.46716600 | -2.46947600 | 1.85635100  |
| H | -1.84946100 | -3.15584100 | 0.23110000  |
| H | -0.32709400 | -4.16112400 | 0.39517800  |
| H | -1.28634600 | -1.95710100 | 2.37122900  |
| H | 0.22098900  | -2.96875400 | 2.54807200  |

Cartesian coordinates of the optimized geometry of Int-6 at PBE0-D3BJ/def2-SVP level of theory:

|    |             |             |             |
|----|-------------|-------------|-------------|
| Ge | -0.57531500 | 2.90963600  | -0.48431200 |
| Ga | 0.60917500  | -0.43311000 | 0.16624600  |
| Cl | 0.14224100  | 0.75254300  | -1.75888500 |
| N  | 2.48048900  | -0.86486700 | -0.10628200 |
| N  | -0.06595400 | -2.22137400 | -0.14938400 |
| C  | 2.87722400  | -1.96160700 | -0.74597600 |
| C  | 2.00356900  | -2.99857400 | -1.11332000 |
| H  | 2.45102300  | -3.81915200 | -1.67191000 |
| C  | 0.64402100  | -3.14786100 | -0.79336800 |
| C  | 4.32965700  | -2.10262400 | -1.09637400 |
| H  | 4.67205700  | -1.22635100 | -1.66709000 |
| H  | 4.50999800  | -3.01046100 | -1.68323100 |
| H  | 4.94572800  | -2.14008700 | -0.18556200 |
| C  | -0.02573200 | -4.42585000 | -1.21385000 |
| H  | -1.05187300 | -4.23529900 | -1.55857900 |
| H  | -0.09520700 | -5.13273100 | -0.37348300 |
| H  | 0.54590500  | -4.90948100 | -2.01527600 |
| C  | 3.39956800  | 0.15024400  | 0.28077000  |
| C  | 4.09642500  | 0.04668200  | 1.48840200  |
| C  | 4.94311800  | 1.07540400  | 1.89440900  |
| H  | 5.48329900  | 0.98950300  | 2.84017200  |
| C  | 5.09075800  | 2.21549100  | 1.10505700  |
| H  | 5.74873700  | 3.02474600  | 1.42930600  |
| C  | 4.38637600  | 2.32374400  | -0.09297200 |
| H  | 4.48596400  | 3.21947800  | -0.71015300 |
| C  | 3.54096500  | 1.29688400  | -0.50778800 |
| C  | -1.39813700 | -2.45518300 | 0.28710900  |
| C  | -1.67170400 | -3.41286300 | 1.27046800  |
| C  | -2.97311700 | -3.58417700 | 1.73382700  |
| H  | -3.17798800 | -4.33353600 | 2.50222600  |
| C  | -4.00592100 | -2.78975700 | 1.23609300  |
| H  | -5.02439900 | -2.91755800 | 1.60951400  |
| C  | -3.73018800 | -1.82053700 | 0.27355300  |
| H  | -4.52137600 | -1.17294700 | -0.10794200 |
| C  | -2.43226100 | -1.65085400 | -0.20287000 |
| C  | -2.44313400 | 2.18410600  | -0.25144600 |
| C  | -3.09519000 | 2.19310500  | 0.99134000  |
| C  | -4.44560600 | 1.85975800  | 1.11141600  |
| H  | -4.92714200 | 1.87894600  | 2.09306500  |
| C  | -5.17911100 | 1.50039000  | -0.01795900 |
| H  | -6.23796600 | 1.24319700  | 0.07135400  |
| C  | -4.55073200 | 1.47526200  | -1.26473800 |
| H  | -5.11790500 | 1.19679300  | -2.15759700 |
| C  | -3.20460400 | 1.82132900  | -1.37457500 |

|   |             |             |             |
|---|-------------|-------------|-------------|
| C | 0.22226800  | 2.19357200  | 1.24149700  |
| C | 0.01423400  | 0.72786500  | 1.61635800  |
| H | 1.29721000  | 2.44074700  | 1.20772700  |
| H | -0.20246100 | 2.86385700  | 2.01672500  |
| H | 0.54177400  | 0.45141700  | 2.54672500  |
| H | -1.05311500 | 0.50382900  | 1.77627300  |
| H | -2.73294100 | 1.81079400  | -2.36306600 |
| H | -2.54331600 | 2.47106700  | 1.89549200  |
| H | 2.96591600  | 1.38061600  | -1.43230400 |
| H | 3.95704000  | -0.84162200 | 2.10900300  |
| H | -0.85333200 | -4.00628900 | 1.68445400  |
| H | -2.21631500 | -0.88467300 | -0.95114800 |

Cartesian coordinates of the optimized geometry of Int-7 at PBE0-D3BJ/def2-SVP level of theory:

|    |             |             |             |
|----|-------------|-------------|-------------|
| Ge | 0.34147100  | -0.79150800 | -1.14604000 |
| Ga | -0.90027100 | 0.71014600  | 0.24102500  |
| Cl | -0.53346700 | 0.34305400  | 2.39450100  |
| Si | 1.20399300  | -3.28059100 | 0.62101900  |
| N  | -2.82611400 | 0.75400200  | -0.02524300 |
| N  | -0.59863300 | 2.60906100  | -0.05460800 |
| N  | 1.61746200  | -1.83993900 | -0.30706400 |
| C  | -3.51863000 | 1.87021000  | -0.23646500 |
| C  | -2.93247700 | 3.14079600  | -0.35310000 |
| H  | -3.62076400 | 3.96523500  | -0.53093900 |
| C  | -1.57261100 | 3.48779000  | -0.26724100 |
| C  | -5.01184000 | 1.76931700  | -0.35608500 |
| H  | -5.43444700 | 1.29140000  | 0.54049800  |
| H  | -5.29027400 | 1.13077500  | -1.20763100 |
| H  | -5.46784300 | 2.75726200  | -0.48683200 |
| C  | -1.20564900 | 4.93455000  | -0.43041200 |
| H  | -0.76210400 | 5.32545700  | 0.49754400  |
| H  | -2.08207300 | 5.54004100  | -0.68820800 |
| H  | -0.44022700 | 5.05077700  | -1.21206400 |
| C  | -3.45895800 | -0.51584700 | 0.07778700  |
| C  | -3.71450400 | -1.26959100 | -1.07181700 |
| C  | -4.26139200 | -2.54539300 | -0.96203800 |
| H  | -4.45281800 | -3.13056200 | -1.86443900 |
| C  | -4.54752400 | -3.07979800 | 0.29352700  |
| H  | -4.96716600 | -4.08458600 | 0.37839500  |
| C  | -4.28101400 | -2.33380200 | 1.44030500  |
| H  | -4.48862600 | -2.75282900 | 2.42753400  |
| C  | -3.73467800 | -1.05608500 | 1.33785800  |
| C  | 0.76118000  | 3.01145200  | 0.06574000  |
| C  | 1.62652600  | 2.87994400  | -1.02447800 |
| C  | 2.97135700  | 3.21549900  | -0.88942600 |
| H  | 3.64501200  | 3.09683300  | -1.74062800 |
| C  | 3.45919400  | 3.67951200  | 0.33034500  |
| H  | 4.51594900  | 3.93494800  | 0.43475300  |
| C  | 2.60061200  | 3.79106400  | 1.42331500  |
| H  | 2.98187800  | 4.13396300  | 2.38810900  |
| C  | 1.25613800  | 3.44941700  | 1.29800400  |
| C  | 2.89043400  | -1.24197400 | -0.13526500 |
| C  | 3.97849600  | -1.65241000 | -0.91967600 |
| C  | 5.23462200  | -1.07135800 | -0.75592000 |
| H  | 6.07039400  | -1.40560700 | -1.37635000 |
| C  | 5.42631300  | -0.06654800 | 0.19174500  |
| H  | 6.41142700  | 0.38857600  | 0.32003600  |
| C  | 4.35077200  | 0.34960200  | 0.97623800  |
| H  | 4.48692000  | 1.13479600  | 1.72341800  |
| C  | 3.09532200  | -0.23145300 | 0.81793100  |
| C  | 2.15871200  | -4.75603300 | -0.05279200 |
| H  | 3.24353300  | -4.57418600 | 0.00738800  |
| H  | 1.90361500  | -4.93902900 | -1.10854900 |
| H  | 1.93898300  | -5.67206800 | 0.51910800  |
| C  | -0.64404900 | -3.56675100 | 0.44779000  |
| H  | -1.22371500 | -2.74111900 | 0.89052900  |
| H  | -0.92481700 | -4.48919300 | 0.98162300  |

|   |             |             |             |
|---|-------------|-------------|-------------|
| H | -0.95515600 | -3.67417900 | -0.60229500 |
| C | 1.64979300  | -3.02699700 | 2.42673900  |
| H | 2.72300900  | -2.80846800 | 2.54191200  |
| H | 1.41898600  | -3.92434100 | 3.02310500  |
| H | 1.08293800  | -2.17683700 | 2.83759600  |
| C | 0.84561100  | -0.43955100 | -3.00439100 |
| C | -0.20507800 | -1.53018800 | -2.87378900 |
| H | 0.53563600  | 0.50000500  | -3.47506600 |
| H | 1.85739900  | -0.74755200 | -3.28981900 |
| H | -1.21000900 | -1.31382000 | -3.25182900 |
| H | 0.11476700  | -2.55809900 | -3.07548300 |
| H | 2.25403300  | 0.08619000  | 1.43959300  |
| H | 3.81530800  | -2.43548100 | -1.66373600 |
| H | -3.48999700 | -0.47484200 | 2.22883700  |
| H | -3.46451600 | -0.85057900 | -2.04883500 |
| H | 0.58115800  | 3.49739200  | 2.15488600  |
| H | 1.23891300  | 2.49570600  | -1.96962000 |

Cartesian coordinates of the optimized geometry of Int-8 at PBE0-D3BJ/def2-SVP level of theory:

|    |             |             |             |
|----|-------------|-------------|-------------|
| Ge | 1.32835000  | -2.18614100 | 0.12309800  |
| Ga | -1.36216700 | 0.27611400  | -0.17147100 |
| Cl | -0.16310600 | -0.32220500 | 1.66871100  |
| Si | 4.11275100  | -1.12368300 | 1.23282100  |
| N  | -3.05274400 | -0.67155000 | 0.07436500  |
| N  | -2.05854100 | 2.04138000  | 0.25846800  |
| N  | 2.82746600  | -1.04759300 | 0.01958100  |
| C  | -4.14570900 | -0.12700200 | 0.59119100  |
| C  | -4.24303100 | 1.23599100  | 0.92192700  |
| H  | -5.19206000 | 1.55370200  | 1.35008200  |
| C  | -3.27881200 | 2.24132400  | 0.76361400  |
| C  | -5.33951000 | -1.00224500 | 0.84013500  |
| H  | -5.06028600 | -1.85388900 | 1.47853800  |
| H  | -5.70949100 | -1.43056000 | -0.10327200 |
| H  | -6.15075900 | -0.44212900 | 1.31899500  |
| C  | -3.65279200 | 3.63031600  | 1.19713000  |
| H  | -2.95025800 | 3.99616000  | 1.96091900  |
| H  | -4.66999300 | 3.65583100  | 1.60383600  |
| H  | -3.58588900 | 4.33397000  | 0.35432200  |
| C  | -2.99227800 | -2.05152900 | -0.26494200 |
| C  | -3.43462500 | -2.48670400 | -1.51807400 |
| C  | -3.28504100 | -3.82213300 | -1.88369200 |
| H  | -3.62729100 | -4.15519500 | -2.86631700 |
| C  | -2.68470900 | -4.72652900 | -1.00776000 |
| H  | -2.55586900 | -5.77045800 | -1.30196300 |
| C  | -2.23693400 | -4.29049500 | 0.23797300  |
| H  | -1.74789300 | -4.98748200 | 0.92189100  |
| C  | -2.38947900 | -2.95741400 | 0.61333400  |
| C  | -1.14241600 | 3.12825600  | 0.17067100  |
| C  | -1.12527200 | 3.94958600  | -0.96017600 |
| C  | -0.24292200 | 5.02551900  | -1.02762000 |
| H  | -0.23946400 | 5.66720300  | -1.91175800 |
| C  | 0.63640100  | 5.27886600  | 0.02465600  |
| H  | 1.32790700  | 6.12261200  | -0.02972900 |
| C  | 0.64318500  | 4.43894300  | 1.13812700  |
| H  | 1.34443000  | 4.61839800  | 1.95635400  |
| C  | -0.23914200 | 3.36332200  | 1.21259500  |
| C  | 2.86564900  | 0.04470700  | -0.87247700 |
| C  | 3.29215800  | -0.13213800 | -2.19840500 |
| C  | 3.29103200  | 0.93085700  | -3.09792500 |
| H  | 3.61593100  | 0.76592000  | -4.12867400 |
| C  | 2.88230800  | 2.20048600  | -2.68881100 |
| H  | 2.88023000  | 3.03431700  | -3.39475000 |
| C  | 2.47919100  | 2.39499300  | -1.36802800 |
| H  | 2.14882200  | 3.38019800  | -1.03367600 |
| C  | 2.46890400  | 1.33096700  | -0.46969200 |
| C  | 5.76243800  | -0.89281300 | 0.36121400  |
| H  | 5.78807400  | 0.06637300  | -0.17917200 |

|   |             |             |             |
|---|-------------|-------------|-------------|
| H | 5.93569300  | -1.69653100 | -0.37164500 |
| H | 6.59485800  | -0.89994800 | 1.08299300  |
| C | 4.06358100  | -2.79168000 | 2.09157800  |
| H | 3.13431600  | -2.93399700 | 2.66322700  |
| H | 4.91180600  | -2.86188900 | 2.79230900  |
| H | 4.14383800  | -3.61967100 | 1.37068900  |
| C | 3.90336800  | 0.23442400  | 2.52204500  |
| H | 4.04118200  | 1.23243500  | 2.07836700  |
| H | 4.63842900  | 0.12194100  | 3.33551100  |
| H | 2.89286800  | 0.19052600  | 2.95844400  |
| C | -0.31879000 | -0.23780500 | -1.74245700 |
| C | 0.31973400  | -1.61698600 | -1.55009300 |
| H | -0.98085600 | -0.22668600 | -2.62683800 |
| H | 0.44332500  | 0.53624100  | -1.91193900 |
| H | -0.45082100 | -2.40278100 | -1.64052200 |
| H | 1.04608100  | -1.81684000 | -2.36203700 |
| H | 2.11808800  | 1.47367000  | 0.55355000  |
| H | 3.61786800  | -1.12746100 | -2.50896700 |
| H | -2.01237500 | -2.59763400 | 1.57245800  |
| H | -3.87646100 | -1.76346100 | -2.20742300 |
| H | -0.23705600 | 2.69037600  | 2.07267400  |
| H | -1.81482700 | 3.73857100  | -1.78070700 |

Cartesian coordinates of the optimized geometry of Int-9 at PBE0-D3BJ/def2-SVP level of theory:

|    |             |             |             |
|----|-------------|-------------|-------------|
| Ge | 0.00006700  | 0.90331700  | 0.00029300  |
| C  | -1.63743600 | -0.11814800 | 0.04188200  |
| C  | -1.67399100 | -1.37160300 | 0.66932200  |
| C  | -2.85676600 | -2.10791900 | 0.71852000  |
| H  | -2.86932800 | -3.08357800 | 1.21081400  |
| C  | -4.02140700 | -1.59888300 | 0.14573500  |
| H  | -4.94910800 | -2.17493000 | 0.18530500  |
| C  | -3.99772800 | -0.35287700 | -0.48029700 |
| H  | -4.90694600 | 0.04894800  | -0.93448700 |
| C  | -2.81320600 | 0.37903700  | -0.53617200 |
| H  | -2.80496000 | 1.34791800  | -1.04300000 |
| H  | -0.76902800 | -1.78011000 | 1.12842600  |
| C  | 1.63751900  | -0.11816100 | -0.04161400 |
| C  | 1.67349100  | -1.37193400 | -0.66847000 |
| C  | 2.81373300  | 0.37917500  | 0.53538700  |
| C  | 2.85613800  | -2.10842500 | -0.71807900 |
| H  | 0.76817300  | -1.78053500 | -1.12677500 |
| C  | 3.99811700  | -0.35293400 | 0.47911100  |
| H  | 2.80596200  | 1.34832700  | 1.04170300  |
| C  | 4.02122300  | -1.59925100 | -0.14631600 |
| H  | 2.86825600  | -3.08432700 | -1.20989600 |
| H  | 4.90768500  | 0.04900400  | 0.93249400  |
| H  | 4.94882400  | -2.17543300 | -0.18621700 |
| C  | -0.02755500 | 2.68890700  | -0.76554500 |
| C  | 0.02757400  | 2.68922300  | 0.76534500  |
| H  | 0.87509200  | 3.01806600  | -1.29132200 |
| H  | -0.94525300 | 3.06215300  | -1.23427300 |
| H  | 0.94530500  | 3.06258600  | 1.23391900  |
| H  | -0.87503800 | 3.01854200  | 1.29108000  |

Cartesian coordinates of the optimized geometry of Int-10 at PBE0-D3BJ/def2-SVP level of theory:

|    |             |             |             |
|----|-------------|-------------|-------------|
| Ge | -0.01929200 | -0.77658100 | -1.22025400 |
| C  | -1.86257800 | -0.25148100 | 0.97556300  |
| C  | -1.25261200 | 1.01165500  | 0.90376600  |
| C  | -1.93683300 | 2.10718100  | 0.37003500  |
| H  | -1.44281200 | 3.08048400  | 0.32208600  |
| C  | -3.24176700 | 1.96001800  | -0.08874900 |
| H  | -3.77826200 | 2.81503600  | -0.50634700 |
| C  | -3.86463100 | 0.71288600  | -0.00679800 |
| H  | -4.89205800 | 0.59243300  | -0.35899600 |
| C  | -3.18085000 | -0.38017100 | 0.51552000  |

|   |             |             |             |
|---|-------------|-------------|-------------|
| H | -3.67124800 | -1.35638900 | 0.56632500  |
| H | -0.23581400 | 1.13895500  | 1.28301100  |
| C | 1.65895700  | -0.12050500 | -0.35371400 |
| C | 2.35458500  | -0.76679000 | 0.68173000  |
| C | 2.19673700  | 1.07951600  | -0.85082700 |
| C | 3.53200000  | -0.23497900 | 1.20452700  |
| H | 1.97455700  | -1.70743700 | 1.09107400  |
| C | 3.36602100  | 1.62653300  | -0.32479800 |
| H | 1.68292600  | 1.59826300  | -1.66791900 |
| C | 4.03603800  | 0.96682600  | 0.70518900  |
| H | 4.05944000  | -0.75640000 | 2.00774500  |
| H | 3.76135400  | 2.56500700  | -0.72224500 |
| H | 4.95660500  | 1.38753700  | 1.11786000  |
| C | -1.06881500 | -1.46202000 | 1.40469400  |
| C | -0.53996500 | -2.18045900 | 0.15622000  |
| H | -0.22740900 | -1.13103200 | 2.03299200  |
| H | -1.69035700 | -2.12857900 | 2.02718600  |
| H | 0.28480800  | -2.87193100 | 0.40010500  |
| H | -1.34213600 | -2.78462800 | -0.29890600 |

Cartesian coordinates of the optimized geometry of Int-**11** at PBE0-D3BJ/def2-SVP level of theory:

|    |             |             |             |
|----|-------------|-------------|-------------|
| Ge | -0.29018700 | 0.68280300  | 0.00071600  |
| C  | 1.53328200  | 0.02110900  | 0.00028200  |
| C  | 1.77623300  | -1.35924600 | 0.00069500  |
| C  | 3.07796900  | -1.85954300 | 0.00037900  |
| H  | 3.24593100  | -2.93953300 | 0.00070300  |
| C  | 4.16163100  | -0.98344000 | -0.00034500 |
| H  | 5.18281500  | -1.37216000 | -0.00059100 |
| C  | 3.93537500  | 0.39336200  | -0.00074700 |
| H  | 4.78074100  | 1.08627700  | -0.00130600 |
| C  | 2.63372200  | 0.88974800  | -0.00045900 |
| H  | 2.47798800  | 1.97260000  | -0.00080300 |
| H  | 0.93732700  | -2.06232400 | 0.00129300  |
| Si | -2.14687200 | -0.77633600 | -0.00017900 |
| C  | -2.11732600 | -1.86114300 | 1.54042900  |
| H  | -2.98955900 | -2.53528900 | 1.55356700  |
| H  | -1.20925300 | -2.48271000 | 1.57807600  |
| H  | -2.14281600 | -1.24816700 | 2.45429000  |
| C  | -3.68323900 | 0.31324900  | -0.00117300 |
| H  | -3.71210800 | 0.95873900  | -0.89259100 |
| H  | -4.59319400 | -0.30860000 | -0.00187300 |
| H  | -3.71350400 | 0.95879500  | 0.89015400  |
| C  | -2.11536800 | -1.86077100 | -1.54102000 |
| H  | -1.20706100 | -2.48203900 | -1.57790600 |
| H  | -2.98737600 | -2.53519000 | -1.55517200 |
| H  | -2.14012800 | -1.24757500 | -2.45474900 |
| C  | -0.48042400 | 2.48495100  | -0.75662100 |
| C  | -0.48026400 | 2.48557400  | 0.75646400  |
| H  | -1.41836200 | 2.73873300  | -1.26161500 |
| H  | 0.39954600  | 2.89686500  | -1.26345600 |
| H  | -1.41813600 | 2.73961400  | 1.26144500  |
| H  | 0.39979800  | 2.89787200  | 1.26282000  |

Cartesian coordinates of the optimized geometry of Int-**12** at PBE0-D3BJ/def2-SVP level of theory:

|    |            |             |             |
|----|------------|-------------|-------------|
| Ge | 0.96750500 | -1.84116800 | 0.01734000  |
| C  | 2.04378400 | -0.16581400 | 0.04143300  |
| C  | 3.32650100 | -0.24629800 | -0.52891400 |
| C  | 4.17917600 | 0.85663500  | -0.56363400 |
| H  | 5.17286700 | 0.76984800  | -1.01051700 |
| C  | 3.75709100 | 2.07221400  | -0.02823000 |
| H  | 4.41934000 | 2.94146200  | -0.05418800 |
| C  | 2.48628800 | 2.17957500  | 0.54108900  |
| H  | 2.15466800 | 3.13313200  | 0.96050800  |
| C  | 1.64377400 | 1.07175200  | 0.57593700  |
| H  | 0.65292100 | 1.17985200  | 1.02601200  |



|    |             |             |             |
|----|-------------|-------------|-------------|
| H  | 3.66317600  | -1.19696000 | -0.95712300 |
| Si | -2.93308000 | 0.51024700  | -0.14929600 |
| C  | -4.18535500 | -0.52304000 | 0.80164500  |
| H  | -5.09608800 | 0.05897700  | 1.01488500  |
| H  | -4.48265800 | -1.41463700 | 0.22686100  |
| H  | -3.77127300 | -0.86342200 | 1.76357700  |
| C  | -2.43014500 | 2.01014400  | 0.87395600  |
| H  | -1.67915800 | 2.61637400  | 0.34238600  |
| H  | -3.29932600 | 2.65540300  | 1.07871100  |
| H  | -2.00241600 | 1.71242500  | 1.84422800  |
| C  | -3.67121400 | 1.08027800  | -1.78488000 |
| H  | -3.97124100 | 0.22176800  | -2.40655200 |
| H  | -4.56420600 | 1.70461400  | -1.62143500 |
| H  | -2.94577900 | 1.67646900  | -2.36102600 |
| C  | -1.38819000 | -0.53439000 | -0.49756500 |
| C  | -0.73354200 | -1.12127600 | 0.76960800  |
| H  | -0.68873200 | 0.12265700  | -1.05186800 |
| H  | -1.66894000 | -1.33736300 | -1.20416400 |
| H  | -1.35823100 | -1.92517700 | 1.18736200  |
| H  | -0.60098500 | -0.36017700 | 1.55493100  |

Cartesian coordinates of the optimized geometry of TS-**1a** at PBE0-D3BJ/def2-SVP level of theory:

|    |             |             |             |
|----|-------------|-------------|-------------|
| Ge | 0.10360400  | 0.98571500  | 0.93855000  |
| Ga | 0.28483600  | -0.95447900 | -0.75662100 |
| Cl | 1.66919300  | -1.34460500 | -2.49675100 |
| N  | 0.78899100  | -2.56113100 | 0.35010200  |
| N  | -1.36042900 | -1.84158600 | -1.47581300 |
| C  | 0.53426700  | -3.77574500 | -0.12844900 |
| C  | -0.34512300 | -4.02085200 | -1.19502300 |
| H  | -0.40594000 | -5.05486900 | -1.53069400 |
| C  | -1.30697200 | -3.15336400 | -1.72715900 |
| C  | 1.19080300  | -4.97665400 | 0.49514400  |
| H  | 2.26385600  | -4.98926400 | 0.25330400  |
| H  | 0.73899500  | -5.90476200 | 0.12626000  |
| H  | 1.11828200  | -4.94871200 | 1.59124300  |
| C  | -2.37624000 | -3.79771900 | -2.56947300 |
| H  | -1.98832400 | -4.71739000 | -3.02598000 |
| H  | -2.74760400 | -3.12714500 | -3.35360800 |
| H  | -3.23961700 | -4.07202000 | -1.94553600 |
| C  | 1.59085900  | -2.45088600 | 1.52476200  |
| C  | 0.95312700  | -2.26170800 | 2.77210500  |
| C  | 1.74247800  | -2.23170300 | 3.92576900  |
| H  | 1.26517500  | -2.09311100 | 4.89725000  |
| C  | 3.12323200  | -2.37852600 | 3.85885300  |
| H  | 3.72192200  | -2.35458200 | 4.77219400  |
| C  | 3.73937900  | -2.52802300 | 2.62337500  |
| H  | 4.82719300  | -2.61079700 | 2.57111600  |
| C  | 2.99666600  | -2.55676300 | 1.43886100  |
| C  | -0.55523500 | -2.14499600 | 2.87679000  |
| H  | -0.90873700 | -1.72400600 | 1.92239800  |
| C  | -1.20017000 | -3.52393000 | 3.03251500  |
| H  | -0.99998200 | -4.16784700 | 2.16427900  |
| H  | -2.29295900 | -3.43478400 | 3.13379100  |
| H  | -0.81898300 | -4.03537500 | 3.93092900  |
| C  | -0.99914200 | -1.19751500 | 3.98667100  |
| H  | -0.77781300 | -1.59886200 | 4.98812300  |
| H  | -2.08491400 | -1.03279400 | 3.93604200  |
| H  | -0.51180900 | -0.21640300 | 3.88273600  |
| C  | 3.71860300  | -2.63169400 | 0.10932300  |
| H  | 2.97831500  | -2.85232200 | -0.67312700 |
| C  | 4.79246900  | -3.71679500 | 0.06698200  |
| H  | 5.20411800  | -3.79980200 | -0.95042300 |
| H  | 4.39777400  | -4.70397100 | 0.35373000  |
| H  | 5.63453100  | -3.49076700 | 0.74018200  |
| C  | 4.31304600  | -1.26709300 | -0.23464200 |
| H  | 5.07475000  | -0.96574500 | 0.50327200  |
| H  | 3.54319500  | -0.48418100 | -0.26886800 |

|   |             |             |             |
|---|-------------|-------------|-------------|
| H | 4.78191600  | -1.29294500 | -1.22878200 |
| C | -2.58054600 | -1.17722300 | -1.79862900 |
| C | -3.70347700 | -1.38110300 | -0.96780600 |
| C | -4.93194200 | -0.84018300 | -1.35960400 |
| H | -5.81043700 | -0.99447100 | -0.72795500 |
| C | -5.05533200 | -0.12625700 | -2.54434200 |
| H | -6.02697600 | 0.27007100  | -2.84906900 |
| C | -3.93094200 | 0.10374700  | -3.33080700 |
| H | -4.03046300 | 0.69232600  | -4.24404500 |
| C | -2.67569400 | -0.39338000 | -2.97047800 |
| C | -3.61128500 | -2.14824800 | 0.33907200  |
| H | -2.61290000 | -2.60600400 | 0.39239100  |
| C | -4.64301100 | -3.27053000 | 0.44787600  |
| H | -4.59744100 | -3.96224800 | -0.40599100 |
| H | -5.66979700 | -2.87517400 | 0.49854100  |
| H | -4.47267500 | -3.85689600 | 1.36410600  |
| C | -3.74496400 | -1.19079900 | 1.51998200  |
| H | -2.97830000 | -0.40244300 | 1.50109600  |
| H | -3.65902800 | -1.73352400 | 2.47314600  |
| H | -4.72467200 | -0.69087000 | 1.50763200  |
| C | -1.45941500 | -0.12048700 | -3.83490900 |
| H | -0.59200300 | -0.05288500 | -3.16031500 |
| C | -1.15407800 | -1.26739800 | -4.79887100 |
| H | -0.28939700 | -1.00886600 | -5.42857600 |
| H | -2.01393500 | -1.46935600 | -5.45843200 |
| H | -0.89115600 | -2.18907400 | -4.26443900 |
| C | -1.54841100 | 1.20126100  | -4.59051400 |
| H | -1.79138900 | 2.04134800  | -3.92246500 |
| H | -2.30632900 | 1.17074500  | -5.38946400 |
| H | -0.58424900 | 1.42115700  | -5.07099900 |
| C | 0.23748500  | 2.80495200  | 0.08373200  |
| C | -0.89363100 | 3.58336100  | 0.41759600  |
| C | -0.97615400 | 4.93170300  | 0.05869000  |
| H | -1.87203700 | 5.49883600  | 0.32658400  |
| C | 0.07062400  | 5.54002700  | -0.62460000 |
| H | 0.01059300  | 6.59419200  | -0.90577500 |
| C | 1.20132100  | 4.79305800  | -0.93760200 |
| H | 2.03749000  | 5.26008500  | -1.46541400 |
| C | 1.30511900  | 3.44051600  | -0.58790900 |
| C | -2.04871200 | 2.98320200  | 1.15176700  |
| C | -2.06506300 | 2.96302600  | 2.56538100  |
| C | -3.20445900 | 2.49575400  | 3.21829000  |
| H | -3.21238600 | 2.47187300  | 4.31225600  |
| C | -4.33984100 | 2.07848300  | 2.51564500  |
| C | -4.30969700 | 2.12739300  | 1.12197700  |
| H | -5.18612000 | 1.80651300  | 0.55177500  |
| C | -3.18187600 | 2.56861900  | 0.42530400  |
| C | -0.87632500 | 3.43968400  | 3.34304800  |
| H | -0.59567900 | 4.46469600  | 3.05635100  |
| H | -0.00004400 | 2.80162100  | 3.13560400  |
| H | -1.07045100 | 3.41670600  | 4.42413100  |
| C | -5.54502100 | 1.56934900  | 3.25049000  |
| H | -5.34694700 | 0.57865900  | 3.69243000  |
| H | -6.41239400 | 1.46819100  | 2.58291800  |
| H | -5.82567500 | 2.24031700  | 4.07684400  |
| C | -3.19584400 | 2.65137200  | -1.07185800 |
| H | -3.19594500 | 3.69959600  | -1.41051900 |
| H | -4.07740600 | 2.14978900  | -1.48756400 |
| H | -2.30240800 | 2.18292900  | -1.50886600 |
| C | 2.58174300  | 2.76116700  | -0.94618300 |
| C | 3.72912900  | 2.96677100  | -0.15469000 |
| C | 4.93665200  | 2.39159400  | -0.55431100 |
| H | 5.82524600  | 2.54175600  | 0.06738200  |
| C | 5.04276300  | 1.64365000  | -1.73102000 |
| C | 3.90206200  | 1.48809300  | -2.51774400 |
| H | 3.95998600  | 0.90839400  | -3.44263600 |
| C | 2.67541800  | 2.04921300  | -2.15335000 |
| C | 3.67449400  | 3.84807500  | 1.06126300  |
| H | 4.53120500  | 3.66495000  | 1.72624500  |

|   |            |             |             |
|---|------------|-------------|-------------|
| H | 2.74671900 | 3.70142500  | 1.63088200  |
| H | 3.70055900 | 4.91170400  | 0.77227400  |
| C | 6.35808400 | 1.04466300  | -2.13762000 |
| H | 6.24812000 | 0.39202900  | -3.01504400 |
| H | 6.79375500 | 0.44597000  | -1.32262000 |
| H | 7.09097500 | 1.82794700  | -2.39151300 |
| C | 1.49221400 | 1.97026900  | -3.06779000 |
| H | 1.29992200 | 2.95157500  | -3.53259300 |
| H | 0.58092700 | 1.70222700  | -2.51532900 |
| H | 1.64693500 | 1.22437600  | -3.85665000 |
| C | 2.93419900 | 0.86213600  | 2.49383900  |
| C | 2.52983700 | 1.55205000  | 3.56157200  |
| H | 2.54524900 | -0.13841900 | 2.29208000  |
| H | 3.68519900 | 1.24458400  | 1.79876900  |
| H | 1.77653100 | 1.14522200  | 4.24291400  |
| H | 2.92963200 | 2.54245200  | 3.79876300  |

Cartesian coordinates of the optimized geometry of TS-**1b** at PBE0-D3BJ/def2-SVP level of theory:

|    |             |             |             |
|----|-------------|-------------|-------------|
| Ge | -1.22356500 | 0.66972300  | 0.18030200  |
| Ga | 1.21030600  | 0.17720900  | -0.58752300 |
| Cl | 1.75002400  | 0.17701400  | -2.80072900 |
| Si | -2.06413500 | -1.99280100 | -1.59952100 |
| N  | 2.76097400  | -0.93572800 | -0.00126400 |
| N  | 2.09437400  | 1.89540400  | -0.07835900 |
| N  | -2.35219400 | -0.71320800 | -0.36860600 |
| C  | 3.98837300  | -0.43028300 | -0.07885300 |
| C  | 4.27244800  | 0.92063600  | -0.35344000 |
| H  | 5.32540400  | 1.15683700  | -0.50302200 |
| C  | 3.40194400  | 2.01659600  | -0.30308900 |
| C  | 5.18208500  | -1.32145300 | 0.13158400  |
| H  | 5.53381500  | -1.70278700 | -0.83897100 |
| H  | 4.94324000  | -2.18892900 | 0.75942200  |
| H  | 6.00557700  | -0.75610000 | 0.58579000  |
| C  | 3.98775700  | 3.38363600  | -0.51520300 |
| H  | 3.73144600  | 3.71804500  | -1.53356200 |
| H  | 5.08012700  | 3.37264800  | -0.41994400 |
| H  | 3.56646500  | 4.12271200  | 0.17881500  |
| C  | 2.55466300  | -2.32074100 | 0.26752300  |
| C  | 2.06253300  | -2.69212600 | 1.54116100  |
| C  | 1.81644600  | -4.04398000 | 1.79028500  |
| H  | 1.43464500  | -4.35304300 | 2.76344800  |
| C  | 2.04919900  | -5.01095400 | 0.81787600  |
| H  | 1.84944300  | -6.06314200 | 1.03349300  |
| C  | 2.52591000  | -4.63101000 | -0.42710400 |
| H  | 2.69411300  | -5.39126700 | -1.19352500 |
| C  | 2.78173200  | -3.29011300 | -0.73473800 |
| C  | 1.82961900  | -1.64925400 | 2.62078800  |
| H  | 1.32823700  | -0.79175000 | 2.13489300  |
| C  | 3.14464300  | -1.13464700 | 3.21171500  |
| H  | 3.77813800  | -0.64970400 | 2.45810400  |
| H  | 3.71607000  | -1.96194400 | 3.66180300  |
| H  | 2.94592900  | -0.39268600 | 4.00120200  |
| C  | 0.91853700  | -2.13808800 | 3.73949200  |
| H  | 0.72064900  | -1.32258300 | 4.44782500  |
| H  | 1.38481300  | -2.95337000 | 4.31439300  |
| H  | -0.04752600 | -2.49813800 | 3.35463200  |
| C  | 3.25028500  | -2.95039400 | -2.13801300 |
| H  | 3.45557700  | -1.87131500 | -2.18327900 |
| C  | 4.52488800  | -3.70769700 | -2.51573600 |
| H  | 4.90586000  | -3.35274300 | -3.48574800 |
| H  | 4.33803400  | -4.78877700 | -2.61469400 |
| H  | 5.32259100  | -3.58291200 | -1.76867200 |
| C  | 2.15021900  | -3.22497800 | -3.16444700 |
| H  | 1.24882000  | -2.63839700 | -2.94857500 |
| H  | 1.87914600  | -4.29312700 | -3.18330100 |
| H  | 2.49129000  | -2.94130000 | -4.17180800 |
| C  | 1.30703900  | 3.03356800  | 0.26469700  |

|   |             |             |             |
|---|-------------|-------------|-------------|
| C | 1.15996300  | 3.36567900  | 1.63488600  |
| C | 0.33744500  | 4.44537000  | 1.96656200  |
| H | 0.20882600  | 4.72371100  | 3.01315100  |
| C | -0.33905700 | 5.17020400  | 0.98969600  |
| H | -0.98772000 | 6.00111000  | 1.27673800  |
| C | -0.18432900 | 4.83272000  | -0.34629100 |
| H | -0.71422800 | 5.40375900  | -1.11257300 |
| C | 0.64492000  | 3.77499600  | -0.73488600 |
| C | 1.85532500  | 2.56379700  | 2.72615700  |
| H | 1.73725300  | 1.50056000  | 2.45127100  |
| C | 3.35864200  | 2.84344500  | 2.82541700  |
| H | 3.54480900  | 3.92096000  | 2.96011900  |
| H | 3.91699300  | 2.49988200  | 1.94751000  |
| H | 3.77969300  | 2.31924600  | 3.69761700  |
| C | 1.24371800  | 2.77462400  | 4.10857700  |
| H | 1.50159500  | 3.76701300  | 4.51159100  |
| H | 1.64475000  | 2.03066200  | 4.81387700  |
| H | 0.14928400  | 2.69050500  | 4.10899300  |
| C | 0.79455600  | 3.45576000  | -2.20812900 |
| H | 1.56802700  | 2.68275200  | -2.31210300 |
| C | 1.24222100  | 4.67191400  | -3.01817800 |
| H | 0.47444300  | 5.46174600  | -3.03485500 |
| H | 1.43976200  | 4.38238200  | -4.06180500 |
| H | 2.16232500  | 5.11509800  | -2.60753200 |
| C | -0.49186000 | 2.86532700  | -2.78080000 |
| H | -1.32052800 | 3.58937000  | -2.74280800 |
| H | -0.80701400 | 1.97133000  | -2.21842800 |
| H | -0.34569100 | 2.54805300  | -3.82387200 |
| C | -3.71885600 | -0.51980100 | 0.01337200  |
| C | -4.26618300 | -1.26447400 | 1.09087700  |
| C | -5.62328900 | -1.11662000 | 1.39181400  |
| H | -6.05342400 | -1.69664800 | 2.21123600  |
| C | -6.43616400 | -0.24194800 | 0.68121400  |
| H | -7.49444900 | -0.14366500 | 0.93399300  |
| C | -5.88447900 | 0.51610700  | -0.34174900 |
| H | -6.51612900 | 1.22033200  | -0.88953400 |
| C | -4.53647300 | 0.39642100  | -0.69357600 |
| C | -3.42870600 | -2.20515800 | 1.94196900  |
| H | -2.37572800 | -1.91775900 | 1.78957700  |
| C | -3.58138900 | -3.67125600 | 1.53144400  |
| H | -4.63127200 | -3.99213900 | 1.62795500  |
| H | -2.97058700 | -4.31805300 | 2.18149900  |
| H | -3.27171500 | -3.85315000 | 0.49644900  |
| C | -3.75606900 | -2.08079100 | 3.43142500  |
| H | -3.79914500 | -1.03491800 | 3.76501100  |
| H | -2.99955000 | -2.60766200 | 4.03435400  |
| H | -4.72693500 | -2.54246100 | 3.67020000  |
| C | -4.00881600 | 1.26760400  | -1.81828800 |
| H | -2.96262700 | 0.98111000  | -1.99665400 |
| C | -4.01860400 | 2.74412300  | -1.42066100 |
| H | -3.63966300 | 3.37087400  | -2.24290600 |
| H | -3.38490100 | 2.91937600  | -0.53755100 |
| H | -5.03765600 | 3.08667400  | -1.18050300 |
| C | -4.76223400 | 1.04029200  | -3.12816800 |
| H | -5.81558200 | 1.35346800  | -3.05258600 |
| H | -4.75193400 | -0.02034400 | -3.42033400 |
| H | -4.30180400 | 1.62108600  | -3.94274100 |
| C | -3.70825500 | -2.81337100 | -2.01232000 |
| H | -4.37142000 | -2.09127800 | -2.51224900 |
| H | -4.25607400 | -3.21322100 | -1.14970100 |
| H | -3.52083400 | -3.63993400 | -2.71735600 |
| C | -0.82525200 | -3.22356100 | -0.92696000 |
| H | 0.12283200  | -2.73179200 | -0.66678000 |
| H | -0.59720800 | -3.99692600 | -1.67630800 |
| H | -1.19144400 | -3.72280400 | -0.01911700 |
| C | -1.47330000 | -1.24503600 | -3.21266500 |
| H | -2.24370400 | -0.57812700 | -3.63018300 |
| H | -1.30611900 | -2.05405500 | -3.94313000 |
| H | -0.53306900 | -0.68180600 | -3.12618900 |

|   |             |             |            |
|---|-------------|-------------|------------|
| C | -2.10554900 | 1.23917500  | 3.06252200 |
| C | -1.36087500 | 0.39733100  | 3.78494500 |
| H | -1.76749800 | 2.25227400  | 2.82564100 |
| H | -3.10033700 | 0.96364300  | 2.69709400 |
| H | -0.37562300 | 0.68309500  | 4.15735300 |
| H | -1.70313200 | -0.60900100 | 4.02847000 |

Cartesian coordinates of the optimized geometry of TS-**2a** at PBE0-D3BJ/def2-SVP level of theory:

|    |             |             |             |
|----|-------------|-------------|-------------|
| Ge | -1.40674900 | 0.65322900  | -0.87019300 |
| Ga | 0.34980200  | -0.98569500 | 0.55469400  |
| Cl | -0.98059700 | -1.09793200 | 2.35733600  |
| N  | 0.22495000  | -2.83094200 | -0.14298100 |
| N  | 2.09609400  | -1.28747500 | 1.48172500  |
| C  | 0.71824300  | -3.83325100 | 0.57431700  |
| C  | 1.62229500  | -3.65549900 | 1.63499000  |
| H  | 1.90423400  | -4.56344500 | 2.16653000  |
| C  | 2.33231400  | -2.49907600 | 1.98999000  |
| C  | 0.30488700  | -5.24714400 | 0.27762600  |
| H  | -0.47126200 | -5.54233800 | 1.00175300  |
| H  | 1.15003900  | -5.93725900 | 0.39779500  |
| H  | -0.11858700 | -5.35429700 | -0.72807300 |
| C  | 3.42726700  | -2.66736800 | 3.00677000  |
| H  | 3.12364000  | -2.20095500 | 3.95618900  |
| H  | 4.35234800  | -2.16429700 | 2.69486000  |
| H  | 3.63540800  | -3.72773500 | 3.19004200  |
| C  | -0.53304700 | -3.04661700 | -1.33335400 |
| C  | 0.14430700  | -3.03715900 | -2.57386300 |
| C  | -0.61309800 | -3.12426400 | -3.74476900 |
| H  | -0.10796000 | -3.11590800 | -4.71290700 |
| C  | -1.99962800 | -3.22347300 | -3.69729800 |
| H  | -2.57653100 | -3.27765400 | -4.62360100 |
| C  | -2.64579500 | -3.27365000 | -2.46881200 |
| H  | -3.73308200 | -3.37729300 | -2.43459300 |
| C  | -1.93392000 | -3.19838400 | -1.26756800 |
| C  | 1.66085700  | -3.01915400 | -2.64714600 |
| H  | 2.02800100  | -2.63292700 | -1.68363800 |
| C  | 2.20668500  | -4.44217700 | -2.79055600 |
| H  | 1.87567100  | -5.09112800 | -1.96824900 |
| H  | 3.30828300  | -4.43762600 | -2.79561400 |
| H  | 1.86365200  | -4.89752100 | -3.73343900 |
| C  | 2.21068500  | -2.12464200 | -3.75438500 |
| H  | 1.93125300  | -2.49278500 | -4.75360500 |
| H  | 3.31028300  | -2.10992500 | -3.71616700 |
| H  | 1.85305400  | -1.08886400 | -3.66269600 |
| C  | -2.67387700 | -3.34698700 | 0.04750500  |
| H  | -1.94294600 | -3.23103900 | 0.86055500  |
| C  | -3.30015500 | -4.73990700 | 0.15842000  |
| H  | -3.74831700 | -4.87892500 | 1.15475400  |
| H  | -2.56506400 | -5.54223400 | -0.00089700 |
| H  | -4.10107500 | -4.87590600 | -0.58603800 |
| C  | -3.73347000 | -2.27059000 | 0.25236300  |
| H  | -4.53208700 | -2.33586500 | -0.50427300 |
| H  | -3.29953800 | -1.26374200 | 0.20315000  |
| H  | -4.19882000 | -2.38198500 | 1.24284900  |
| C  | 3.02015900  | -0.23420700 | 1.76567400  |
| C  | 4.07710200  | 0.00275900  | 0.85679300  |
| C  | 5.01484700  | 0.99392300  | 1.16092100  |
| H  | 5.84166500  | 1.17667300  | 0.47069500  |
| C  | 4.92345000  | 1.73665400  | 2.33216800  |
| H  | 5.66931000  | 2.50249000  | 2.55766200  |
| C  | 3.87309000  | 1.50265800  | 3.21051000  |
| H  | 3.79683400  | 2.09409000  | 4.12585800  |
| C  | 2.90592500  | 0.52649700  | 2.95074200  |
| C  | 4.26131200  | -0.83502900 | -0.39504300 |
| H  | 3.32240000  | -1.38429200 | -0.55426900 |
| C  | 5.35868100  | -1.88381800 | -0.20561400 |
| H  | 5.13597800  | -2.55934400 | 0.63273600  |

|   |             |             |             |
|---|-------------|-------------|-------------|
| H | 6.33186000  | -1.40752200 | -0.00518600 |
| H | 5.46444200  | -2.50031200 | -1.11249000 |
| C | 4.52743600  | 0.01662200  | -1.63407700 |
| H | 3.73902200  | 0.76802500  | -1.78497100 |
| H | 4.57176000  | -0.61744800 | -2.53181500 |
| H | 5.49034100  | 0.54681000  | -1.56532200 |
| C | 1.77988500  | 0.32476500  | 3.94619900  |
| H | 1.22972900  | -0.58242300 | 3.65860200  |
| C | 2.28968700  | 0.13688100  | 5.37514900  |
| H | 1.45532500  | -0.12883500 | 6.04215000  |
| H | 2.74598800  | 1.05655500  | 5.77422700  |
| H | 3.04550600  | -0.66055500 | 5.44372000  |
| C | 0.78051600  | 1.47968900  | 3.88249600  |
| H | 0.33484200  | 1.56907100  | 2.88242700  |
| H | 1.26110000  | 2.44009600  | 4.12993700  |
| H | -0.04460500 | 1.31278100  | 4.59123200  |
| C | -1.51641000 | 2.58994500  | -0.23747100 |
| C | -0.64581700 | 3.68521200  | -0.45640000 |
| C | -0.94474500 | 4.94643000  | 0.07508400  |
| H | -0.24686700 | 5.76877500  | -0.10598600 |
| C | -2.10987100 | 5.16556200  | 0.80082800  |
| H | -2.33225700 | 6.15686600  | 1.20354900  |
| C | -2.99984200 | 4.11582900  | 0.98205700  |
| H | -3.94252300 | 4.27481600  | 1.51242600  |
| C | -2.71735200 | 2.84198800  | 0.47203000  |
| C | 0.60116800  | 3.62291200  | -1.27402800 |
| C | 0.53585100  | 3.82293200  | -2.66511800 |
| C | 1.71933100  | 3.80777300  | -3.40850500 |
| H | 1.66356800  | 3.94906500  | -4.49217400 |
| C | 2.96557800  | 3.61155400  | -2.80835900 |
| C | 3.00884200  | 3.45917300  | -1.42075100 |
| H | 3.97268200  | 3.32220200  | -0.92144800 |
| C | 1.84784000  | 3.47122200  | -0.64360100 |
| C | -0.78851200 | 4.02387000  | -3.34270300 |
| H | -1.33959200 | 4.86842100  | -2.90138300 |
| H | -1.43272300 | 3.13797100  | -3.22176200 |
| H | -0.66264300 | 4.21284500  | -4.41777200 |
| C | 4.22123100  | 3.53845200  | -3.62784600 |
| H | 4.09064100  | 4.00860900  | -4.61300900 |
| H | 4.51687200  | 2.48932300  | -3.79900300 |
| H | 5.06353000  | 4.03229300  | -3.12060300 |
| C | 1.93035300  | 3.32990700  | 0.84572300  |
| H | 1.67981900  | 4.27688800  | 1.35032300  |
| H | 2.93362200  | 3.02355200  | 1.16470300  |
| H | 1.21034500  | 2.58889900  | 1.21864900  |
| C | -3.78935900 | 1.81414800  | 0.64863700  |
| C | -4.64156800 | 1.50288900  | -0.43000600 |
| C | -5.71721600 | 0.63687200  | -0.21877800 |
| H | -6.37892500 | 0.40329800  | -1.05852300 |
| C | -5.97435500 | 0.07167900  | 1.03048900  |
| C | -5.11726200 | 0.39439400  | 2.08451300  |
| H | -5.29618700 | -0.04087700 | 3.07230700  |
| C | -4.03324100 | 1.25767600  | 1.92023200  |
| C | -4.41359900 | 2.08429300  | -1.79759700 |
| H | -5.31103900 | 1.98147300  | -2.42342800 |
| H | -3.59444600 | 1.56339500  | -2.32788500 |
| H | -4.13363800 | 3.14673700  | -1.75147600 |
| C | -7.11014000 | -0.88933600 | 1.22560600  |
| H | -7.51544800 | -0.83502500 | 2.24662300  |
| H | -6.77407800 | -1.92745300 | 1.06218400  |
| H | -7.93043700 | -0.69590100 | 0.51904000  |
| C | -3.15043300 | 1.59172500  | 3.08643400  |
| H | -3.37795300 | 0.94813800  | 3.94713700  |
| H | -3.27189000 | 2.64073800  | 3.39925200  |
| H | -2.09245500 | 1.44610200  | 2.83059000  |
| C | 0.06838400  | 0.56844700  | -2.21190200 |
| C | 0.98281600  | 0.19892500  | -1.07986400 |
| H | -0.11516800 | -0.26456000 | -2.90128400 |
| H | 0.35732000  | 1.47986400  | -2.73913600 |

|   |            |             |             |
|---|------------|-------------|-------------|
| H | 1.64702700 | -0.64363700 | -1.31935000 |
| H | 1.56582000 | 1.03479800  | -0.68081500 |

Cartesian coordinates of the optimized geometry of TS-**2b** at PBE0-D3BJ/def2-SVP level of theory:

|    |             |             |             |
|----|-------------|-------------|-------------|
| Ge | -1.13913400 | 0.72744600  | -0.27090000 |
| Ga | 1.18196800  | 0.11622100  | -0.68944600 |
| Cl | 1.49198100  | 0.00316500  | -2.91569200 |
| Si | -2.61459000 | -1.91186700 | -1.35761900 |
| N  | 2.49545600  | -1.28071900 | -0.15719300 |
| N  | 2.33186500  | 1.63479500  | -0.19179300 |
| N  | -2.55954300 | -0.52238900 | -0.26916800 |
| C  | 3.78580800  | -0.99530700 | -0.31995800 |
| C  | 4.28671700  | 0.29217300  | -0.58894200 |
| H  | 5.35256900  | 0.34269100  | -0.80844200 |
| C  | 3.63407200  | 1.52233000  | -0.46290900 |
| C  | 4.81334500  | -2.09018900 | -0.23616000 |
| H  | 4.97584100  | -2.50967000 | -1.24094200 |
| H  | 4.49313600  | -2.91335600 | 0.41401300  |
| H  | 5.77164600  | -1.69190500 | 0.11941700  |
| C  | 4.45435900  | 2.76011100  | -0.68943700 |
| H  | 4.40495100  | 2.99894700  | -1.76466400 |
| H  | 5.50802300  | 2.60037200  | -0.42923000 |
| H  | 4.06523900  | 3.62752300  | -0.14279700 |
| C  | 2.09582500  | -2.61280400 | 0.17783600  |
| C  | 1.76057400  | -2.89082900 | 1.52239100  |
| C  | 1.34903200  | -4.18289100 | 1.85495600  |
| H  | 1.08094800  | -4.41227000 | 2.88755600  |
| C  | 1.28140200  | -5.18420400 | 0.89209300  |
| H  | 0.95531100  | -6.18948400 | 1.16866700  |
| C  | 1.62836600  | -4.89988800 | -0.42064800 |
| H  | 1.57148600  | -5.68876200 | -1.17431000 |
| C  | 2.03810600  | -3.61967900 | -0.80955800 |
| C  | 1.89776600  | -1.82358500 | 2.58911700  |
| H  | 1.66540200  | -0.86755900 | 2.10073400  |
| C  | 3.33546700  | -1.72613900 | 3.10413500  |
| H  | 4.04210100  | -1.45842800 | 2.30680200  |
| H  | 3.66117900  | -2.68414800 | 3.53984200  |
| H  | 3.41237900  | -0.95449600 | 3.88646500  |
| C  | 0.92645200  | -1.99890600 | 3.75056900  |
| H  | 0.91911500  | -1.09607200 | 4.37940700  |
| H  | 1.20950300  | -2.84423300 | 4.39779200  |
| H  | -0.10017400 | -2.17384100 | 3.39830600  |
| C  | 2.38244500  | -3.37733900 | -2.26705100 |
| H  | 2.75500300  | -2.34761400 | -2.36631500 |
| C  | 3.46375700  | -4.33626600 | -2.76834200 |
| H  | 3.77443800  | -4.05975100 | -3.78766100 |
| H  | 3.09616000  | -5.37376200 | -2.80953500 |
| H  | 4.35678900  | -4.33288600 | -2.12596900 |
| C  | 1.13825200  | -3.47559900 | -3.14823000 |
| H  | 0.36613400  | -2.76766100 | -2.82632000 |
| H  | 0.70939300  | -4.49053300 | -3.12175800 |
| H  | 1.38915700  | -3.23656400 | -4.19280500 |
| C  | 1.78092400  | 2.86259200  | 0.28267100  |
| C  | 1.86451800  | 3.14443700  | 1.66853900  |
| C  | 1.25894600  | 4.31041600  | 2.14407600  |
| H  | 1.30765500  | 4.54374900  | 3.20935800  |
| C  | 0.57960600  | 5.17131200  | 1.28760200  |
| H  | 0.09948400  | 6.06963700  | 1.68262100  |
| C  | 0.52185600  | 4.88881400  | -0.07104200 |
| H  | 0.00354400  | 5.57662200  | -0.74360000 |
| C  | 1.12891300  | 3.74612200  | -0.60325300 |
| C  | 2.60892500  | 2.22986200  | 2.62961800  |
| H  | 2.62999500  | 1.22790800  | 2.17052600  |
| C  | 4.06460200  | 2.66677200  | 2.81369900  |
| H  | 4.11389300  | 3.68830900  | 3.22351700  |
| H  | 4.62577600  | 2.65581000  | 1.87135100  |
| H  | 4.58033500  | 1.99386000  | 3.51659000  |

|   |             |             |             |
|---|-------------|-------------|-------------|
| C | 1.93487900  | 2.11265000  | 3.99620100  |
| H | 2.02650500  | 3.04426700  | 4.57589700  |
| H | 2.41988200  | 1.32058200  | 4.58735300  |
| H | 0.86597700  | 1.86965100  | 3.91160200  |
| C | 1.13830800  | 3.54065700  | -2.10611900 |
| H | 1.61432200  | 2.57143700  | -2.31251000 |
| C | 1.97590100  | 4.62626300  | -2.78776600 |
| H | 1.51102700  | 5.61891000  | -2.67492100 |
| H | 2.06559600  | 4.42027200  | -3.86568900 |
| H | 2.98987300  | 4.68875200  | -2.36672900 |
| C | -0.26157500 | 3.49021500  | -2.71289200 |
| H | -0.79055100 | 4.45064400  | -2.60212300 |
| H | -0.87166000 | 2.70997600  | -2.23554900 |
| H | -0.19933800 | 3.26128100  | -3.78746500 |
| C | -3.76208000 | -0.07043700 | 0.33688300  |
| C | -4.18075700 | -0.62647700 | 1.57253100  |
| C | -5.38908900 | -0.20845100 | 2.13784700  |
| H | -5.71768300 | -0.64985500 | 3.08268000  |
| C | -6.17492700 | 0.76180900  | 1.52861200  |
| H | -7.11526100 | 1.07884300  | 1.98588100  |
| C | -5.74844100 | 1.32879100  | 0.33379200  |
| H | -6.36166500 | 2.09781800  | -0.14402000 |
| C | -4.55744400 | 0.93012200  | -0.27930500 |
| C | -3.34497400 | -1.65887100 | 2.30571100  |
| H | -2.40306100 | -1.75052200 | 1.74291300  |
| C | -4.01114800 | -3.03447200 | 2.32581400  |
| H | -4.96974600 | -3.00525400 | 2.86859300  |
| H | -3.36495500 | -3.77265900 | 2.82742000  |
| H | -4.21621300 | -3.40212900 | 1.31089000  |
| C | -3.01699500 | -1.20856200 | 3.72995300  |
| H | -2.53482900 | -0.21996600 | 3.74420200  |
| H | -2.33854300 | -1.92579600 | 4.21856500  |
| H | -3.92415400 | -1.14349900 | 4.35116600  |
| C | -4.15846300 | 1.58857100  | -1.58677000 |
| H | -3.22617800 | 1.10985300  | -1.92212700 |
| C | -3.86817200 | 3.07752500  | -1.39577500 |
| H | -3.53462100 | 3.53368500  | -2.34109900 |
| H | -3.07628700 | 3.23419000  | -0.64778600 |
| H | -4.76562600 | 3.62049200  | -1.05843600 |
| C | -5.19761600 | 1.36640200  | -2.68514600 |
| H | -6.15978100 | 1.84184600  | -2.43649100 |
| H | -5.38926100 | 0.29539300  | -2.84701600 |
| H | -4.85105900 | 1.79694600  | -3.63786800 |
| C | -4.39851300 | -2.47549600 | -1.53296800 |
| H | -5.01740300 | -1.68661400 | -1.98543100 |
| H | -4.85802700 | -2.73952100 | -0.57011000 |
| H | -4.44029600 | -3.36022300 | -2.18861300 |
| C | -1.56882100 | -3.30312700 | -0.65591600 |
| H | -0.56237300 | -2.95194600 | -0.38336100 |
| H | -1.44734600 | -4.12818100 | -1.37435000 |
| H | -2.02932100 | -3.71163000 | 0.25624500  |
| C | -2.00871000 | -1.40029800 | -3.06309600 |
| H | -2.71807500 | -0.68196300 | -3.50487400 |
| H | -1.95581800 | -2.27291700 | -3.73403300 |
| H | -1.01443600 | -0.92608600 | -3.05806000 |
| C | -1.32166000 | 1.66721200  | 1.50258200  |
| C | -0.44603300 | 0.58173600  | 1.84518600  |
| H | -0.91779900 | 2.68291500  | 1.47388800  |
| H | -2.37977200 | 1.60000600  | 1.77915000  |
| H | 0.60132100  | 0.79283300  | 2.04807900  |
| H | -0.84458400 | -0.33730000 | 2.27089000  |

Cartesian coordinates of the optimized geometry of TS-**3a** at PBE0-D3BJ/def2-SVP level of theory:

|    |             |             |             |
|----|-------------|-------------|-------------|
| Ge | 0.87788000  | 0.44070600  | 0.82779500  |
| Ge | -1.11692100 | 1.11063600  | -0.86171200 |
| Ga | 5.55669100  | -0.82642900 | 0.19724300  |
| Ga | -5.44487000 | -0.85168900 | -0.21802400 |



|    |             |             |             |
|----|-------------|-------------|-------------|
| Cl | 5.69320200  | -2.46562900 | 1.70156800  |
| Cl | -5.50186000 | -2.32180600 | -1.90288700 |
| N  | 6.35574100  | -1.58641100 | -1.42268700 |
| N  | 7.06127500  | 0.36184700  | 0.63320900  |
| N  | -6.23046400 | -1.89180300 | 1.26275400  |
| N  | -7.05320400 | 0.24149100  | -0.54439900 |
| C  | 7.68152100  | -1.64350900 | -1.53721100 |
| C  | 8.57430000  | -0.98217300 | -0.67421100 |
| H  | 9.63047400  | -1.17538800 | -0.85551500 |
| C  | 8.29547800  | 0.01567100  | 0.27479900  |
| C  | 8.28031700  | -2.44587600 | -2.65683400 |
| H  | 7.80018000  | -2.20537900 | -3.61585200 |
| H  | 8.10833900  | -3.51834800 | -2.48381400 |
| H  | 9.35924800  | -2.27051300 | -2.73647700 |
| C  | 9.46722100  | 0.71058600  | 0.90761000  |
| H  | 10.37572000 | 0.59117700  | 0.30546700  |
| H  | 9.65034200  | 0.26628900  | 1.89902500  |
| H  | 9.27035700  | 1.77859200  | 1.06912000  |
| C  | 5.52218900  | -2.15965300 | -2.43482800 |
| C  | 5.20745700  | -3.53424100 | -2.41487300 |
| C  | 4.42350900  | -4.04896600 | -3.45337900 |
| H  | 4.16867900  | -5.11134200 | -3.45015900 |
| C  | 3.95317800  | -3.23811500 | -4.47742400 |
| H  | 3.34083500  | -3.66177900 | -5.27652600 |
| C  | 4.23107200  | -1.87578100 | -4.45777700 |
| H  | 3.81890300  | -1.23245500 | -5.23672200 |
| C  | -0.34066100 | 0.86342100  | -2.75973000 |
| C  | 4.99951700  | -1.31103300 | -3.43667400 |
| C  | 5.64061300  | -4.45780000 | -1.29311300 |
| H  | 6.30267400  | -3.89260900 | -0.62081500 |
| C  | 6.40320000  | -5.68188400 | -1.80031800 |
| H  | 5.76078000  | -6.33656400 | -2.41013300 |
| H  | 6.77051100  | -6.28034000 | -0.95251100 |
| H  | 7.27042500  | -5.40670000 | -2.41969200 |
| C  | 4.42824500  | -4.88841700 | -0.46696300 |
| H  | 3.72379900  | -5.47663500 | -1.07644700 |
| H  | 3.88914800  | -4.02319800 | -0.05794100 |
| H  | 4.74408000  | -5.50934400 | 0.38521500  |
| C  | 5.24998000  | 0.18354200  | -3.40897200 |
| H  | 5.41821600  | 0.45174900  | -2.35521900 |
| C  | 6.51852300  | 0.56398400  | -4.17298600 |
| H  | 7.41437000  | 0.09928300  | -3.73672900 |
| H  | 6.66869600  | 1.65499600  | -4.15559800 |
| H  | 6.44906900  | 0.24960800  | -5.22658100 |
| C  | 4.05105600  | 0.99015200  | -3.89740900 |
| H  | 3.88883700  | 0.88005600  | -4.98038300 |
| H  | 4.21134200  | 2.06085900  | -3.70690400 |
| H  | 3.11761300  | 0.68899600  | -3.39839600 |
| C  | 6.80947900  | 1.54939800  | 1.38645600  |
| C  | 6.82247300  | 1.53256400  | 2.79545100  |
| C  | 6.54433600  | 2.72265700  | 3.47739500  |
| H  | 6.55611600  | 2.72298700  | 4.57008900  |
| C  | 6.24539100  | 3.89446200  | 2.79604600  |
| H  | 6.03039500  | 4.81263400  | 3.34823000  |
| C  | 6.21380200  | 3.89266700  | 1.40537300  |
| H  | 5.96793100  | 4.81331000  | 0.87325000  |
| C  | 6.49336300  | 2.73330900  | 0.67846600  |
| C  | 7.09667600  | 0.27482200  | 3.59370000  |
| H  | 7.31999200  | -0.53528300 | 2.88402700  |
| C  | 8.29284100  | 0.43452300  | 4.53185500  |
| H  | 8.51395700  | -0.51901700 | 5.03576200  |
| H  | 8.09598700  | 1.18292900  | 5.31584900  |
| H  | 9.19846000  | 0.75366200  | 3.99440900  |
| C  | 5.84731100  | -0.14304300 | 4.36740000  |
| H  | 4.99002800  | -0.26246500 | 3.69229600  |
| H  | 5.57964600  | 0.60389200  | 5.13220300  |
| H  | 6.00664400  | -1.10771900 | 4.87248800  |
| C  | 6.49672300  | 2.76378300  | -0.83772500 |
| H  | 6.27660300  | 1.74000800  | -1.17585900 |

|   |              |             |             |
|---|--------------|-------------|-------------|
| C | 7.88002300   | 3.12661000  | -1.38217000 |
| H | 8.64607300   | 2.40196800  | -1.07466400 |
| H | 8.19086100   | 4.12112600  | -1.02392100 |
| H | 7.86885100   | 3.14971700  | -2.48292100 |
| C | 5.43267700   | 3.68560800  | -1.42429000 |
| H | 5.39163500   | 3.56820400  | -2.51733000 |
| H | 5.65220000   | 4.74654000  | -1.22693500 |
| H | 4.43293200   | 3.46856100  | -1.02136600 |
| C | -7.54747400  | -2.08005400 | 1.31598200  |
| C | -8.47529400  | -1.38849700 | 0.51710600  |
| H | -9.51428400  | -1.69109400 | 0.63546600  |
| C | -8.26037700  | -0.24827000 | -0.27174600 |
| C | -8.10676400  | -3.07076300 | 2.29782600  |
| H | -7.86129100  | -4.09477600 | 1.98131600  |
| H | -9.19649800  | -2.97908900 | 2.37122400  |
| H | -7.66212800  | -2.93670000 | 3.29389100  |
| C | -9.47036900  | 0.46803300  | -0.79863000 |
| H | -9.44794700  | 0.48575800  | -1.89805900 |
| H | -9.47794500  | 1.51802000  | -0.47342100 |
| H | -10.39557300 | -0.01701800 | -0.46713600 |
| C | -5.38732300  | -2.54195900 | 2.21600100  |
| C | -4.99327700  | -3.88393300 | 2.03216300  |
| C | -4.20810200  | -4.48443400 | 3.02261800  |
| H | -3.89154600  | -5.52205200 | 2.89323800  |
| C | -3.81875200  | -3.78911400 | 4.15889300  |
| H | -3.20742200  | -4.27886400 | 4.92029600  |
| C | -4.18126300  | -2.45438600 | 4.30661600  |
| H | -3.83811900  | -1.90119700 | 5.18185000  |
| C | -4.95211000  | -1.80347800 | 3.33963600  |
| C | -5.35696800  | -4.68554700 | 0.79682300  |
| H | -6.05381000  | -4.08669200 | 0.19219600  |
| C | -6.03281100  | -6.01404000 | 1.13932300  |
| H | -6.37553100  | -6.51396300 | 0.22040100  |
| H | -6.90436900  | -5.88451000 | 1.79888300  |
| H | -5.33947700  | -6.70305000 | 1.64708300  |
| C | -4.12074200  | -4.93050800 | -0.06757100 |
| H | -4.39323400  | -5.49352000 | -0.97306800 |
| H | -3.36384300  | -5.51324400 | 0.48151200  |
| H | -3.66344500  | -3.98938300 | -0.40052900 |
| C | -5.30915500  | -0.33736800 | 3.50030300  |
| H | -5.37389200  | 0.08500000  | 2.48484800  |
| C | -6.67985400  | -0.14913000 | 4.15231900  |
| H | -7.48670300  | -0.58717300 | 3.54823700  |
| H | -6.90473900  | 0.92214800  | 4.27547900  |
| H | -6.70589100  | -0.61650000 | 5.14975100  |
| C | -4.23708500  | 0.44637300  | 4.24850300  |
| H | -3.23921200  | 0.29387500  | 3.81187900  |
| H | -4.18364800  | 0.16306900  | 5.31121900  |
| H | -4.46200100  | 1.52167400  | 4.21623700  |
| C | -6.92498400  | 1.54610200  | -1.11022100 |
| C | -6.88100900  | 1.72620000  | -2.50812800 |
| C | -6.73769400  | 3.02516000  | -3.00609400 |
| H | -6.70313100  | 3.17765100  | -4.08769600 |
| C | -6.63354400  | 4.11988300  | -2.15712200 |
| H | -6.51981900  | 5.12586100  | -2.56840800 |
| C | -6.67504200  | 3.92705600  | -0.78119500 |
| H | -6.59570400  | 4.78875500  | -0.11363200 |
| C | -6.82350600  | 2.64960300  | -0.23466200 |
| C | -6.96319900  | 0.56543500  | -3.47807700 |
| H | -7.14086500  | -0.35051100 | -2.89574100 |
| C | -8.10794900  | 0.72338600  | -4.47825100 |
| H | -7.95191000  | 1.58724600  | -5.14375700 |
| H | -9.07809100  | 0.86553200  | -3.97765800 |
| H | -8.18425900  | -0.17202000 | -5.11414700 |
| C | -5.62982900  | 0.38047500  | -4.19885000 |
| H | -5.65507100  | -0.51352300 | -4.83967800 |
| H | -4.81076000  | 0.24795600  | -3.48023900 |
| H | -5.39056300  | 1.25030000  | -4.83163100 |
| C | -6.89837300  | 2.48663900  | 1.27145100  |

|   |             |             |             |
|---|-------------|-------------|-------------|
| H | -6.91750900 | 1.40808900  | 1.48579600  |
| C | -8.18479400 | 3.08829500  | 1.83851400  |
| H | -9.08024600 | 2.64346200  | 1.38026900  |
| H | -8.22682000 | 4.17563700  | 1.66588200  |
| H | -8.24532300 | 2.91855600  | 2.92505900  |
| C | -5.66961400 | 3.07101100  | 1.96041100  |
| H | -4.74765800 | 2.59476400  | 1.60073000  |
| H | -5.72863900 | 2.92319700  | 3.04922200  |
| H | -5.57928100 | 4.15404500  | 1.78241100  |
| C | 3.84624500  | 0.12055400  | 0.04156400  |
| H | 4.12486400  | 1.17848600  | 0.15654800  |
| H | 3.50133700  | 0.00316300  | -0.99704600 |
| C | 2.77738100  | -0.26939400 | 1.04710500  |
| H | 3.08637500  | 0.00352100  | 2.06762500  |
| H | 2.62284400  | -1.35941200 | 1.06900600  |
| C | -3.76403900 | 0.14498700  | 0.02603700  |
| H | -4.03085000 | 1.21203800  | -0.08648200 |
| H | -3.44317000 | 0.03872000  | 1.07592100  |
| C | -2.64170700 | -0.22495000 | -0.94162300 |
| H | -2.99414000 | -0.13823200 | -1.98094800 |
| H | -2.32340500 | -1.26935400 | -0.84019400 |
| C | 2.01183500  | 2.58854000  | 0.18892200  |
| H | 2.57808400  | 2.62537400  | 1.12337600  |
| H | 2.50559700  | 2.15002500  | -0.68018500 |
| C | 0.86199700  | 3.28745000  | 0.02929300  |
| H | 0.38381000  | 3.38634200  | -0.94030900 |
| H | 0.39643300  | 3.82797300  | 0.85020000  |
| C | 0.27456100  | 0.49347200  | 2.77258000  |
| C | 0.10148900  | -0.78551900 | 3.36191600  |
| C | -0.43107000 | -0.91785300 | 4.65033200  |
| H | -0.56006700 | -1.92405200 | 5.05765300  |
| C | -0.77174900 | 0.19739500  | 5.40265400  |
| H | -1.18372800 | 0.08753300  | 6.40872000  |
| C | -0.55713200 | 1.45709300  | 4.86145700  |
| H | -0.78022700 | 2.35282400  | 5.44731600  |
| C | -0.04257300 | 1.62126600  | 3.56656200  |
| C | 0.50037400  | -2.07078200 | 2.70906500  |
| C | -0.41405400 | -2.75666900 | 1.88646200  |
| C | -0.08310600 | -4.02319500 | 1.40694100  |
| H | -0.81214200 | -4.54887500 | 0.78658700  |
| C | 1.13901700  | -4.62883700 | 1.70993500  |
| C | 2.03448100  | -3.93078200 | 2.52119900  |
| H | 3.00066300  | -4.38021100 | 2.76748300  |
| C | 1.72436600  | -2.67452300 | 3.05276800  |
| C | -1.75837100 | -2.16992300 | 1.60817000  |
| H | -1.68536400 | -1.11192100 | 1.33230700  |
| H | -2.39551200 | -2.22277400 | 2.50224000  |
| H | -2.26685400 | -2.70388300 | 0.79699900  |
| C | 1.45987400  | -6.00069500 | 1.19225500  |
| H | 0.68123700  | -6.72437800 | 1.48112100  |
| H | 2.42268700  | -6.36302800 | 1.57760600  |
| H | 1.51399700  | -6.01508100 | 0.09197300  |
| C | 2.68477900  | -2.03317200 | 4.01135400  |
| H | 3.72166800  | -2.23131100 | 3.70708300  |
| H | 2.54605700  | -2.44106200 | 5.02688500  |
| H | 2.53817500  | -0.94785900 | 4.08362700  |
| C | 0.21524800  | 3.03951800  | 3.18446400  |
| C | -0.84383900 | 3.88138300  | 2.79160300  |
| C | -0.57966700 | 5.22936000  | 2.53651200  |
| H | -1.40330100 | 5.87394800  | 2.21462400  |
| C | 0.70810900  | 5.76244800  | 2.63852800  |
| C | 1.73801600  | 4.91392600  | 3.04908800  |
| H | 2.75311800  | 5.31035700  | 3.14775600  |
| C | 1.51104900  | 3.56559400  | 3.34380200  |
| C | -2.21629300 | 3.33028500  | 2.56084900  |
| H | -2.93843700 | 4.13571400  | 2.37331800  |
| H | -2.56972000 | 2.72979200  | 3.40974600  |
| H | -2.20877100 | 2.66791700  | 1.67678400  |
| C | 0.97620300  | 7.19220400  | 2.26900200  |

|   |             |             |             |
|---|-------------|-------------|-------------|
| H | 0.16514300  | 7.85525500  | 2.60552300  |
| H | 1.05259100  | 7.30240900  | 1.17390300  |
| H | 1.91883300  | 7.55440500  | 2.70367000  |
| C | 2.63525000  | 2.70550400  | 3.84793400  |
| H | 3.59917200  | 3.22792000  | 3.78740200  |
| H | 2.72229300  | 1.76638100  | 3.28289300  |
| H | 2.46275000  | 2.41140800  | 4.89585300  |
| C | -0.14963400 | 2.03984600  | -3.53582000 |
| C | 0.36957000  | 1.97068900  | -4.83724300 |
| H | 0.47516400  | 2.89392900  | -5.41258200 |
| C | 0.72612200  | 0.75483200  | -5.40192200 |
| H | 1.14214200  | 0.71121200  | -6.41182100 |
| C | 0.50133000  | -0.40927000 | -4.67892700 |
| H | 0.72467300  | -1.38380700 | -5.12199500 |
| C | -0.06001500 | -0.37476200 | -3.39342900 |
| C | -0.54165300 | 3.40706400  | -3.07191300 |
| C | 0.44291500  | 4.41142000  | -2.92098100 |
| C | 0.06803200  | 5.68171200  | -2.47795300 |
| H | 0.84506600  | 6.43922300  | -2.33471300 |
| C | -1.25928900 | 6.00043300  | -2.18617100 |
| C | -2.22502500 | 5.01804200  | -2.40139700 |
| H | -3.27813800 | 5.24857900  | -2.21161400 |
| C | -1.89566000 | 3.73525100  | -2.84885000 |
| C | 1.89888300  | 4.13216200  | -3.17346100 |
| H | 2.17011500  | 3.10764500  | -2.88692200 |
| H | 2.53340400  | 4.83207300  | -2.61106300 |
| H | 2.15538500  | 4.23489300  | -4.24025100 |
| C | -1.62575100 | 7.34472600  | -1.62768200 |
| H | -0.98777100 | 8.14236700  | -2.03665400 |
| H | -1.50127000 | 7.35809200  | -0.53109600 |
| H | -2.67399500 | 7.59994100  | -1.84063200 |
| C | -3.00826900 | 2.75528800  | -3.08120800 |
| H | -3.31568300 | 2.27238300  | -2.13819300 |
| H | -2.72233900 | 1.96101400  | -3.78223600 |
| H | -3.90075500 | 3.26522900  | -3.46904500 |
| C | -0.42176700 | -1.73089900 | -2.86878100 |
| C | 0.49233400  | -2.49627200 | -2.12403200 |
| C | 0.19792500  | -3.82652900 | -1.82941900 |
| H | 0.93618800  | -4.40867200 | -1.27300200 |
| C | -0.99534700 | -4.42615800 | -2.23739800 |
| C | -1.90016900 | -3.64805700 | -2.95822500 |
| H | -2.84895000 | -4.08572000 | -3.28162800 |
| C | -1.62127100 | -2.32208400 | -3.30808800 |
| C | 1.80774300  | -1.92149400 | -1.71430500 |
| H | 2.20679300  | -2.43253400 | -0.82795800 |
| H | 1.70843900  | -0.85187100 | -1.49363700 |
| H | 2.54941200  | -2.01836900 | -2.52050500 |
| C | -1.26966800 | -5.86994800 | -1.92904200 |
| H | -2.24066000 | -6.19094300 | -2.33037800 |
| H | -1.27761900 | -6.06099300 | -0.84392000 |
| H | -0.49243400 | -6.52137600 | -2.36042300 |
| C | -2.58545500 | -1.59419300 | -4.19911500 |
| H | -2.40205400 | -1.84821100 | -5.25697200 |
| H | -2.48679200 | -0.50458900 | -4.11442700 |
| H | -3.61914800 | -1.87366900 | -3.95455300 |

Cartesian coordinates of the optimized geometry of TS-4 at PBE0-D3BJ/def2-SVP level of theory:

|    |             |             |             |
|----|-------------|-------------|-------------|
| Ge | -0.48611100 | -1.36924900 | -0.93408300 |
| Ga | 0.55896100  | 0.34097100  | 0.38019300  |
| Cl | 0.49998700  | 0.14958300  | 2.59742600  |
| N  | 2.38561100  | 0.86670700  | -0.03410100 |
| N  | -0.23385600 | 2.08696000  | -0.01162100 |
| C  | 2.76907600  | 2.13751900  | -0.13974100 |
| C  | 1.88195200  | 3.22457600  | -0.13663900 |
| H  | 2.33983100  | 4.21022200  | -0.20356400 |
| C  | 0.47394100  | 3.20022400  | -0.13855300 |
| C  | 4.23634100  | 2.42472800  | -0.28185200 |

|   |             |             |             |
|---|-------------|-------------|-------------|
| H | 4.79559600  | 1.99027900  | 0.56039200  |
| H | 4.42822300  | 3.50297200  | -0.32348700 |
| H | 4.63467500  | 1.95634900  | -1.19445200 |
| C | -0.24899000 | 4.50730700  | -0.30215900 |
| H | -1.10448200 | 4.56541800  | 0.38623200  |
| H | -0.65357600 | 4.60414500  | -1.32103400 |
| H | 0.42612500  | 5.35203600  | -0.11976500 |
| C | 3.30894900  | -0.20872600 | -0.10583900 |
| C | 3.61937400  | -0.78386900 | -1.34275500 |
| C | 4.45560700  | -1.89670700 | -1.40427200 |
| H | 4.69243200  | -2.34251300 | -2.37333800 |
| C | 4.97938900  | -2.44628200 | -0.23458500 |
| H | 5.62854400  | -3.32327600 | -0.28411900 |
| C | 4.66231200  | -1.87884600 | 0.99913100  |
| H | 5.05979300  | -2.31234800 | 1.91978100  |
| C | 3.82776500  | -0.76518800 | 1.06858400  |
| C | -1.64266100 | 2.03906500  | -0.17474500 |
| C | -2.21545400 | 2.17438400  | -1.44481300 |
| C | -3.58602600 | 1.99830500  | -1.61319800 |
| H | -4.02436900 | 2.09589900  | -2.60926800 |
| C | -4.39143500 | 1.67013400  | -0.52312100 |
| H | -5.46249900 | 1.50850700  | -0.66119000 |
| C | -3.82020600 | 1.52461800  | 0.73887200  |
| H | -4.44091600 | 1.24391400  | 1.59207600  |
| C | -2.45101100 | 1.70703300  | 0.91753300  |
| C | -2.27887300 | -1.76271300 | -0.21061200 |
| C | -2.53325000 | -1.83438700 | 1.16797400  |
| C | -3.82893200 | -2.01964300 | 1.64794100  |
| H | -4.00512200 | -2.07569200 | 2.72559200  |
| C | -4.89808600 | -2.12920000 | 0.75843800  |
| H | -5.91390400 | -2.27481100 | 1.13512400  |
| C | -4.66440700 | -2.04909900 | -0.61291000 |
| H | -5.49735200 | -2.12855400 | -1.31666800 |
| C | -3.36594800 | -1.86336300 | -1.08924900 |
| H | 3.54241800  | -0.33071500 | 2.02897500  |
| H | 3.18380100  | -0.35682300 | -2.24908200 |
| H | -1.98642400 | 1.56514000  | 1.89573500  |
| H | -1.57125800 | 2.38663100  | -2.30116600 |
| H | -3.19888500 | -1.79064800 | -2.16838600 |
| H | -1.70871500 | -1.72760500 | 1.87865100  |
| C | 0.64568300  | -2.81021100 | 0.19561000  |
| C | 0.51616200  | -3.10090000 | -1.21184400 |
| H | 1.60806800  | -2.46844400 | 0.58425800  |
| H | -0.00211800 | -3.31384000 | 0.91689500  |
| H | 1.38922100  | -2.99779000 | -1.86213500 |
| H | -0.20106900 | -3.86371200 | -1.53072500 |

Cartesian coordinates of the optimized geometry of TS-5 at PBE0-D3BJ/def2-SVP level of theory:

|    |             |             |             |
|----|-------------|-------------|-------------|
| Ge | -0.25173500 | -2.67903500 | 0.00679300  |
| Ga | 0.51704800  | 0.35875200  | 0.20752600  |
| Cl | 0.11034500  | -0.13858700 | 2.34023000  |
| N  | 2.40591300  | 0.84384000  | 0.16437500  |
| N  | -0.15104200 | 2.19384000  | 0.05988300  |
| C  | 2.82878200  | 2.05784100  | 0.50699300  |
| C  | 1.96585300  | 3.14932100  | 0.70043900  |
| H  | 2.43739600  | 4.06944900  | 1.04265300  |
| C  | 0.58884300  | 3.23601400  | 0.42571200  |
| C  | 4.30024600  | 2.29065000  | 0.70596500  |
| H  | 4.75948400  | 1.44648500  | 1.24033300  |
| H  | 4.47139800  | 3.21571700  | 1.26956600  |
| H  | 4.82045700  | 2.37920600  | -0.25973100 |
| C  | -0.05557500 | 4.58735500  | 0.56527800  |
| H  | -1.06733200 | 4.49837600  | 0.98533600  |
| H  | -0.15377300 | 5.08283400  | -0.41249500 |
| H  | 0.55172600  | 5.23431400  | 1.21017500  |
| C  | 3.29183900  | -0.21258700 | -0.16126200 |
| C  | 4.06398700  | -0.17135000 | -1.32835100 |

|   |             |             |             |
|---|-------------|-------------|-------------|
| C | 4.86810200  | -1.25442100 | -1.67286300 |
| H | 5.46607100  | -1.21407400 | -2.58650300 |
| C | 4.89670200  | -2.39311700 | -0.86729100 |
| H | 5.52148600  | -3.24511200 | -1.14443700 |
| C | 4.11502700  | -2.44254800 | 0.28545700  |
| H | 4.12026600  | -3.33444600 | 0.91599100  |
| C | 3.31416400  | -1.35949400 | 0.64141600  |
| C | -1.50408900 | 2.31660300  | -0.34278500 |
| C | -1.85154500 | 3.01420800  | -1.50577100 |
| C | -3.17737100 | 3.05043300  | -1.92964000 |
| H | -3.43769600 | 3.59604500  | -2.83993300 |
| C | -4.16459400 | 2.37716900  | -1.21042200 |
| H | -5.20195200 | 2.39701900  | -1.55189900 |
| C | -3.81765100 | 1.66682400  | -0.06243600 |
| H | -4.57628500 | 1.11829100  | 0.49894600  |
| C | -2.49578600 | 1.63514800  | 0.37403800  |
| C | -2.20709000 | -2.26567300 | 0.13045400  |
| C | -2.76598500 | -2.13847800 | 1.41334500  |
| C | -4.12754600 | -1.89466600 | 1.58965000  |
| H | -4.53961200 | -1.79217000 | 2.59712700  |
| C | -4.96379700 | -1.78821400 | 0.47803700  |
| H | -6.03354300 | -1.60571000 | 0.61191500  |
| C | -4.43184000 | -1.91466000 | -0.80556300 |
| H | -5.08364800 | -1.82781100 | -1.67897000 |
| C | -3.06765400 | -2.14708100 | -0.97251400 |
| H | 2.69310900  | -1.39152000 | 1.53977800  |
| H | 4.01106500  | 0.70886600  | -1.97329000 |
| H | -2.21755300 | 1.07442100  | 1.26967600  |
| H | -1.06983400 | 3.50614100  | -2.08886000 |
| H | -2.66870300 | -2.23651200 | -1.98748300 |
| H | -2.11525800 | -2.21145400 | 2.29016700  |
| C | 0.05709200  | -2.02951100 | -1.84613200 |
| C | -0.04128100 | -0.54211500 | -1.50565300 |
| H | 1.07628300  | -2.30140000 | -2.15779200 |
| H | -0.64253300 | -2.32186500 | -2.64384800 |
| H | 0.60755200  | 0.07132800  | -2.15916000 |
| H | -1.07450900 | -0.18229000 | -1.62830400 |

Cartesian coordinates of the optimized geometry of TS-6 at PBE0-D3BJ/def2-SVP level of theory:

|    |             |             |             |
|----|-------------|-------------|-------------|
| Ge | 0.08131000  | -1.20674000 | 1.06424300  |
| Ga | 0.84549100  | 0.67873800  | -0.21943000 |
| Cl | 0.50678400  | 0.25133000  | -2.38165900 |
| Si | -1.25136200 | -3.38567300 | -0.78352000 |
| N  | 2.77644700  | 0.89465800  | 0.04663900  |
| N  | 0.40236800  | 2.57781100  | -0.02066400 |
| N  | -1.43447400 | -1.99835200 | 0.28518000  |
| C  | 3.38356100  | 2.06525600  | 0.20723300  |
| C  | 2.70024600  | 3.29075500  | 0.25096400  |
| H  | 3.32343900  | 4.17507800  | 0.37109000  |
| C  | 1.32202900  | 3.53067600  | 0.13226600  |
| C  | 4.88036200  | 2.09435600  | 0.33182100  |
| H  | 5.34316500  | 1.53193900  | -0.49278600 |
| H  | 5.20581500  | 1.60632000  | 1.26241000  |
| H  | 5.25642300  | 3.12390700  | 0.32474400  |
| C  | 0.87138800  | 4.96422700  | 0.16368400  |
| H  | 0.30665600  | 5.20747400  | -0.74883500 |
| H  | 1.72688600  | 5.64372800  | 0.24915000  |
| H  | 0.18721300  | 5.14249600  | 1.00604800  |
| C  | 3.50366900  | -0.32638500 | 0.03547800  |
| C  | 3.94530400  | -0.90018800 | 1.23213100  |
| C  | 4.58860300  | -2.13451900 | 1.21921700  |
| H  | 4.92620300  | -2.57803900 | 2.15885800  |
| C  | 4.78232200  | -2.81202300 | 0.01565100  |
| H  | 5.27718700  | -3.78569300 | 0.00825100  |
| C  | 4.32834300  | -2.24815200 | -1.17507000 |
| H  | 4.46382800  | -2.77946400 | -2.11991600 |
| C  | 3.68942700  | -1.00961700 | -1.17006900 |

|   |             |             |             |
|---|-------------|-------------|-------------|
| C | -0.96463900 | 2.93896700  | -0.20378300 |
| C | -1.79016900 | 3.20010600  | 0.89355200  |
| C | -3.11934200 | 3.56566000  | 0.69792200  |
| H | -3.75752800 | 3.76317700  | 1.56206400  |
| C | -3.63474800 | 3.67193600  | -0.59242300 |
| H | -4.67770400 | 3.95938200  | -0.74355000 |
| C | -2.81848700 | 3.39274500  | -1.68715800 |
| H | -3.21853900 | 3.45953200  | -2.70173100 |
| C | -1.48934300 | 3.02078100  | -1.49793100 |
| C | -2.69801700 | -1.37309700 | 0.35049100  |
| C | -3.63634200 | -1.75972600 | 1.32036900  |
| C | -4.88887500 | -1.15044500 | 1.38843200  |
| H | -5.60376200 | -1.46677400 | 2.15268500  |
| C | -5.23093500 | -0.14744300 | 0.48351500  |
| H | -6.21375100 | 0.32752600  | 0.53207800  |
| C | -4.30760100 | 0.24208300  | -0.48798000 |
| H | -4.56453000 | 1.02449100  | -1.20468600 |
| C | -3.05368900 | -0.35775800 | -0.55317600 |
| C | -2.23232000 | -4.84312200 | -0.10613900 |
| H | -3.29688500 | -4.57769400 | -0.00658900 |
| H | -1.86241000 | -5.13774800 | 0.88868800  |
| H | -2.16438700 | -5.71844500 | -0.77223400 |
| C | 0.57534600  | -3.82038700 | -0.87257400 |
| H | 1.16090700  | -2.99914500 | -1.31519600 |
| H | 0.70332400  | -4.70777500 | -1.51415300 |
| H | 1.00734800  | -4.05382600 | 0.11302700  |
| C | -1.88253900 | -2.97197100 | -2.50332000 |
| H | -2.94625000 | -2.68843000 | -2.47903500 |
| H | -1.77645900 | -3.83562400 | -3.17955100 |
| H | -1.31229000 | -2.12729500 | -2.92056800 |
| C | -0.85192300 | 0.24288900  | 2.37437200  |
| C | -0.31770600 | -0.93289300 | 3.02174800  |
| H | -0.31639600 | 1.18921500  | 2.48161400  |
| H | -1.92436800 | 0.32183800  | 2.17712800  |
| H | 0.57167600  | -0.85308400 | 3.65375900  |
| H | -1.01438200 | -1.72300100 | 3.31979500  |
| H | -2.32669600 | -0.05288600 | -1.30987500 |
| H | -3.36250900 | -2.55386700 | 2.01924500  |
| H | 3.30470300  | -0.57033700 | -2.09240900 |
| H | 3.75964800  | -0.37847700 | 2.17396900  |
| H | -0.84520700 | 2.78060300  | -2.34552600 |
| H | -1.38273100 | 3.11740100  | 1.90267200  |

Cartesian coordinates of the optimized geometry of TS-7 at PBE0-D3BJ/def2-SVP level of theory:

|    |             |             |             |
|----|-------------|-------------|-------------|
| Ge | -0.02117500 | -1.23141900 | -0.81321500 |
| C  | -1.53204800 | -0.02812900 | 0.12138000  |
| C  | -1.20668400 | 1.27659500  | 0.53107300  |
| C  | -2.17135100 | 2.28310700  | 0.56302700  |
| H  | -1.88770500 | 3.29051100  | 0.87861900  |
| C  | -3.48824400 | 2.00881200  | 0.20240000  |
| H  | -4.24478600 | 2.79635900  | 0.23115200  |
| C  | -3.83426200 | 0.71297900  | -0.19624700 |
| H  | -4.86377900 | 0.48606300  | -0.48527600 |
| C  | -2.87252300 | -0.28628600 | -0.23899800 |
| H  | -3.15902600 | -1.29045000 | -0.56791900 |
| H  | -0.17843100 | 1.50741100  | 0.82264700  |
| C  | 1.57375800  | -0.14957800 | -0.25180100 |
| C  | 2.37909500  | -0.35411600 | 0.87670400  |
| C  | 1.93307800  | 0.88876200  | -1.12572700 |
| C  | 3.49147500  | 0.44948000  | 1.13073700  |
| H  | 2.14638500  | -1.15365900 | 1.58777700  |
| C  | 3.04040200  | 1.69903700  | -0.87992500 |
| H  | 1.32803200  | 1.07559800  | -2.02058600 |
| C  | 3.82378300  | 1.48001700  | 0.25285300  |
| H  | 4.10260700  | 0.26942200  | 2.01922600  |
| H  | 3.29453900  | 2.50384400  | -1.57471100 |
| H  | 4.69431700  | 2.11057400  | 0.45011300  |

|   |             |             |            |
|---|-------------|-------------|------------|
| C | -0.79868500 | -1.41699400 | 1.41973300 |
| C | -0.12511700 | -2.52331200 | 0.79271500 |
| H | -0.20335500 | -0.72917300 | 2.02665200 |
| H | -1.81930000 | -1.55077300 | 1.78118300 |
| H | 0.90367300  | -2.73030100 | 1.10194900 |
| H | -0.71164000 | -3.42228800 | 0.58451600 |

Cartesian coordinates of the optimized geometry of TS-8 at PBE0-D3BJ/def2-SVP level of theory:

|    |             |             |             |
|----|-------------|-------------|-------------|
| Ge | -0.31758300 | -0.97256500 | -0.90623900 |
| C  | 1.44101500  | -0.27640900 | -0.23710900 |
| C  | 2.09558600  | 0.64385800  | -1.07041900 |
| C  | 3.34161600  | 1.17430900  | -0.73522400 |
| H  | 3.82933000  | 1.88919000  | -1.40312400 |
| C  | 3.96151100  | 0.79238100  | 0.45296000  |
| H  | 4.93615500  | 1.20647900  | 0.72302900  |
| C  | 3.33187800  | -0.12490700 | 1.29445300  |
| H  | 3.81432100  | -0.43231800 | 2.22617200  |
| C  | 2.08960300  | -0.65423500 | 0.94733500  |
| H  | 1.62645800  | -1.37858700 | 1.62524900  |
| H  | 1.62116900  | 0.95782600  | -2.00694600 |
| Si | -1.87640700 | 0.76678500  | 0.20881900  |
| C  | -1.15039400 | 2.18180800  | -0.82116000 |
| H  | -1.74159000 | 3.09532900  | -0.63823000 |
| H  | -0.10816000 | 2.38790800  | -0.53411700 |
| H  | -1.17521800 | 1.95087200  | -1.89621500 |
| C  | -3.60583900 | 0.36187900  | -0.42022400 |
| H  | -4.09455600 | -0.43083700 | 0.16688300  |
| H  | -4.23716200 | 1.26309300  | -0.35319800 |
| H  | -3.57793800 | 0.04105700  | -1.47210300 |
| C  | -2.00171900 | 1.52329900  | 1.94057600  |
| H  | -1.00017500 | 1.75926500  | 2.33505900  |
| H  | -2.56277700 | 2.46964000  | 1.87624100  |
| H  | -2.51248800 | 0.87336400  | 2.66689400  |
| C  | -1.20169500 | -1.16490400 | 1.18955000  |
| C  | -0.69154200 | -2.35827100 | 0.49464500  |
| H  | -2.26057500 | -1.20028100 | 1.47792900  |
| H  | -0.56154900 | -0.74770200 | 1.97425000  |
| H  | -1.43914500 | -3.09739200 | 0.19160200  |
| H  | 0.21616400  | -2.81266700 | 0.90450200  |
